# Supplementary material for: Electronic and steric effects controlling monomer–dimer self-assembly in 6H-1,4-diazepinoporphyrazines: an experimental and theoretical study
Source: Royal Society of Chemistry journal article supplement (doi:10.1039/d2dt03371b), 2023-01-01
Supplement: d2dt03371b1.pdf [file d2dt03371b1.pdf]

## Supporting Information

### Electronic and steric effects controlling monomer-dimer self-assembly in 6*H*-1,4-diazepinoporphyrazines: experimental and theoretical study

Pavel A. Tarakanov\*<sup>a</sup>, Anton O. Simakov,<sup>a</sup> Victor E. Pushkarev,<sup>a</sup> Dmitry V. Konev,<sup>b</sup>  
Olga A. Goncharova,<sup>b</sup> Nikita A. Slesarenko,<sup>b</sup> Ekaterina N. Tarakanova,<sup>a,c</sup> [Sergey E. Nefedov]<sup>d</sup> and  
Pavel A. Stuzhin<sup>c</sup>

<sup>a</sup> *Institute of Physiologically Active Compounds at Federal Research Center of Problems of Chemical Physics and Medicinal Chemistry, Russian Academy of Sciences, 1 Severny Proezd, 142432 Chernogolovka, Moscow Region, Russian Federation. E-mails: tarakanov@ipac.ac.ru, pushkarev@ipac.ac.ru*

<sup>b</sup> *Federal Research Center of Problems of Chemical Physics and Medicinal Chemistry, Russian Academy of Sciences, 1 Academician Semenov Avenue, 142432 Chernogolovka, Moscow Region, Russian Federation*

<sup>c</sup> *Research Institute of Macroheterocycles, Ivanovo State University of Chemistry and Technology, RF-153000 Ivanovo, Russian Federation. E-mail: tarakanova.ek.nik@gmail.com*

<sup>d</sup> *Kurnakov Institute of General and Inorganic Chemistry, Russian Academy of Sciences, Leninskii pr. 31, 119991 Moscow, Russian Federation*

#### Table of Contents

|                                                                                 |     |
|---------------------------------------------------------------------------------|-----|
| Mass spectra                                                                    | S2  |
| NMR spectra                                                                     | S3  |
| X-ray structure analysis of <sup>t</sup> BuPh <sub>8</sub> Dz <sub>4</sub> PzNi | S10 |
| UV-vis and TD-DFT study                                                         | S17 |
| DFT calculation details                                                         | S17 |
| Hirshfeld surface analysis                                                      | S44 |
| NCI-RDG analysis                                                                | S47 |
| NBO analysis                                                                    | S49 |
| Atomic dipole corrected Hirshfeld atomic charge                                 | S49 |
| UV-vis and fluorescence spectra                                                 | S53 |
| Spectroelectrochemistry                                                         | S54 |
| References                                                                      | S56 |

# Mass spectra

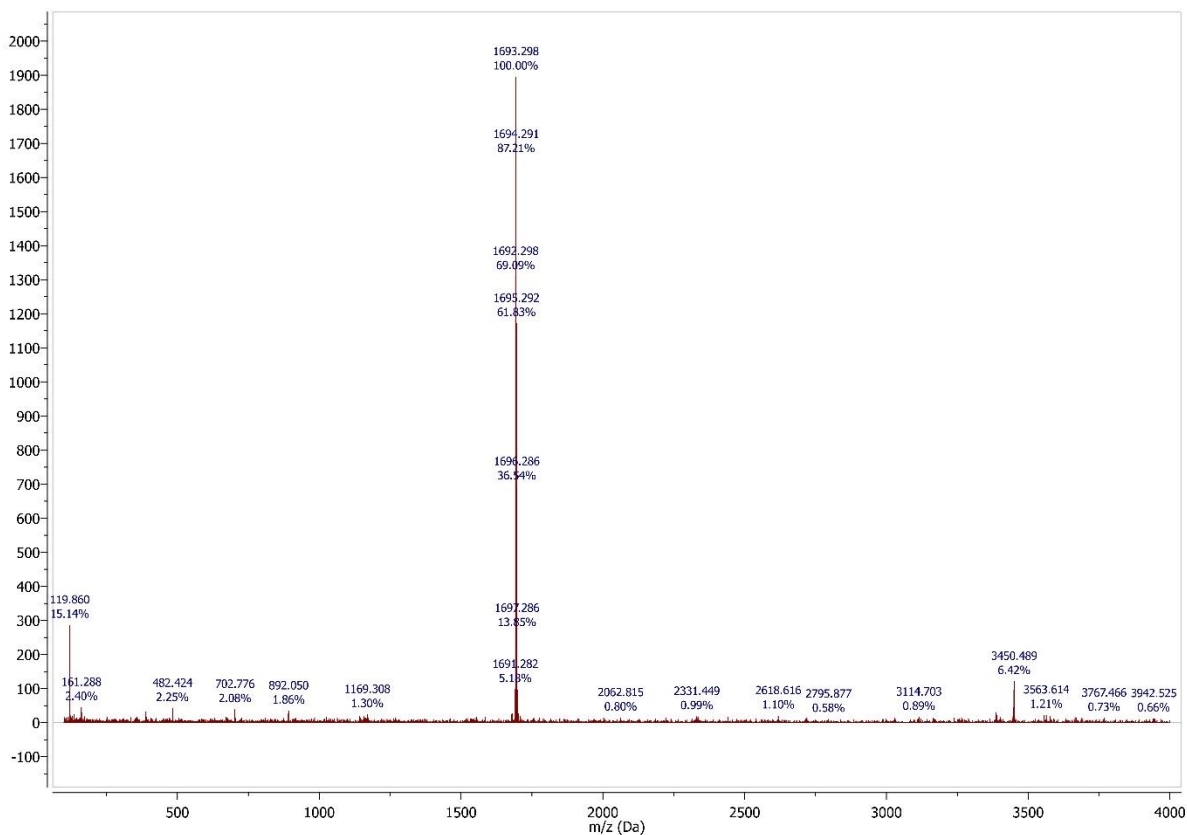

Fig. S1 MALDI-TOF mass spectrum of  $t\text{BuPh}_8\text{Dz}_4\text{PzNi}$ .

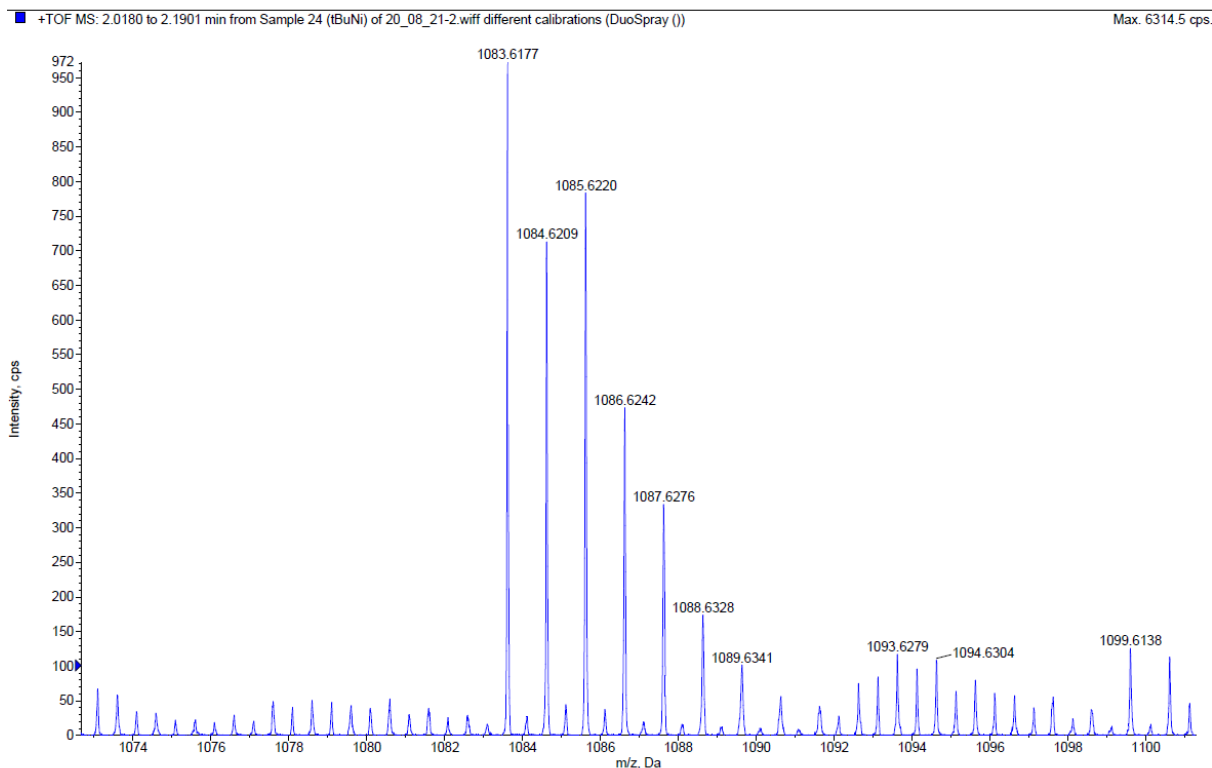

Fig. S2 High-resolution ESI-TOF mass spectrum of  $t\text{Bu}_8\text{Dz}_4\text{PzNi}$ .

# NMR spectra

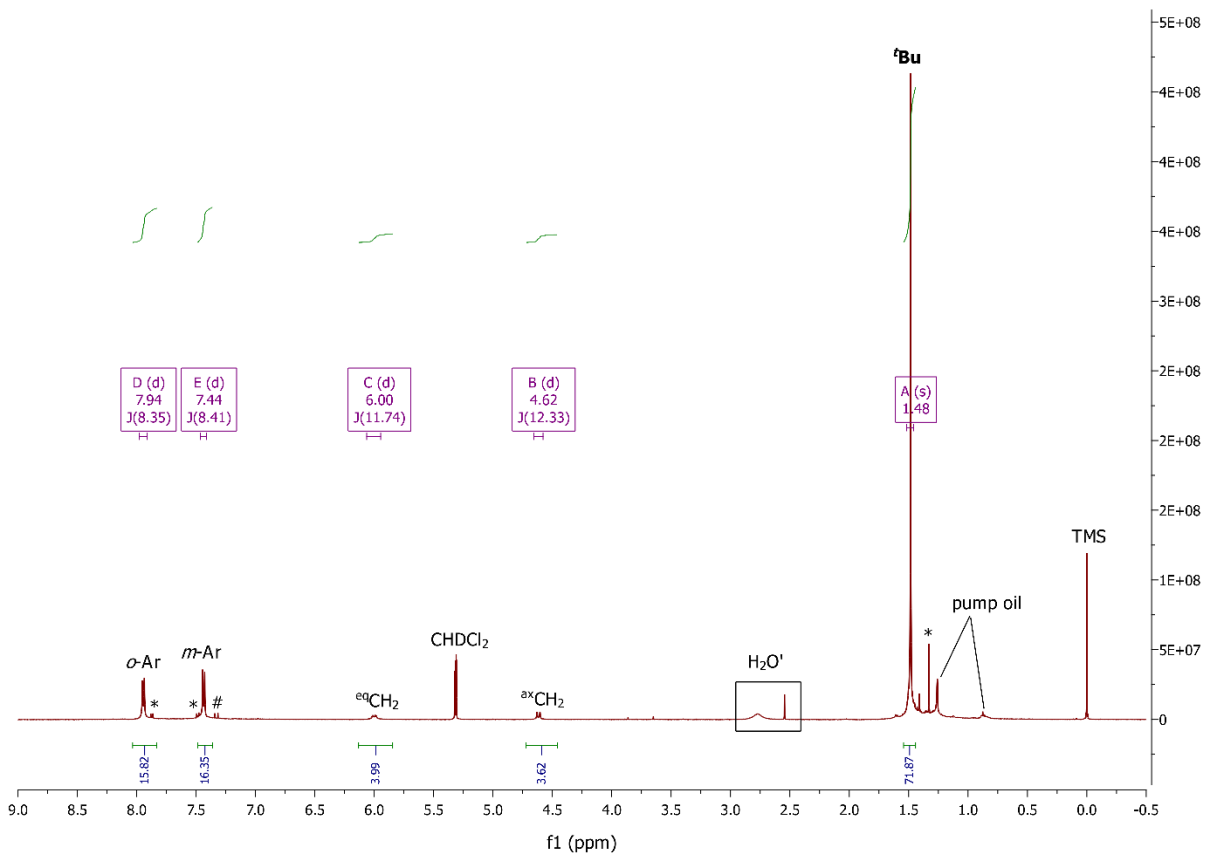

**Fig. S3**  $^1\text{H}$  NMR spectrum of  ${}^t\text{BuPh}_8\text{Dz}_4\text{PzNi}$  ( $\text{CD}_2\text{Cl}_2$ , 298 K). \*  $^1\text{H}$  NMR signals of the isomer of  ${}^t\text{BuPh}_8\text{Dz}_4\text{PzNi}$  resulting from imine-enamine tautomerization of 6*H*-1,4-diazepine heterocycle or that of the aggregated form of  ${}^t\text{BuPh}_8\text{Dz}_4\text{PzNi}$  dimer. #  $^1\text{H}$  NMR signals of the trace impurities of chloroform (7.32 ppm) and benzene (7.35 ppm).  $\text{H}_2\text{O}'$  designates the signals of water molecules included into the structure of  ${}^t\text{BuPh}_8\text{Dz}_4\text{PzNi}$  via  $\text{HO}\cdots\text{N}^{\text{Dz}}$  hydrogen bonds.<sup>2</sup>

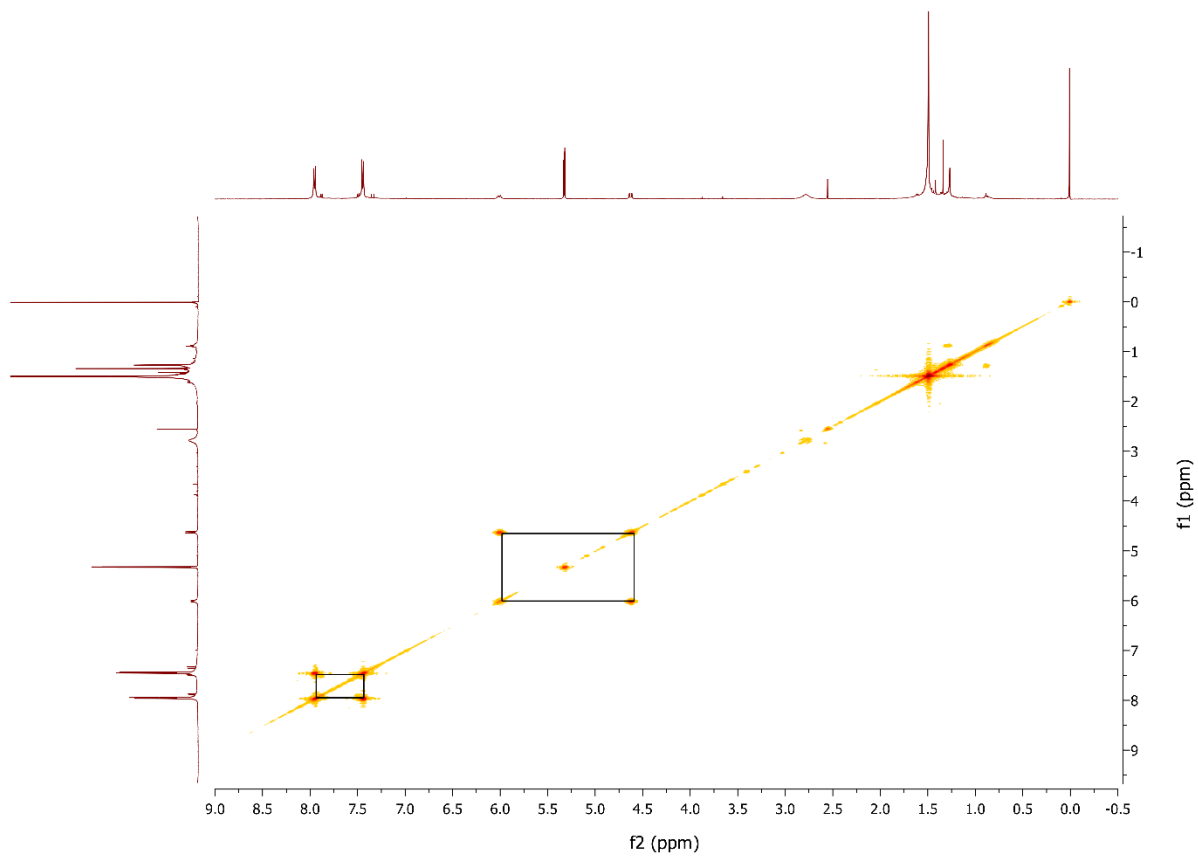

**Fig. S4** <sup>1</sup>H-<sup>1</sup>H COSY spectrum of <sup>t</sup>BuPh<sub>8</sub>Dz<sub>4</sub>PzNi (CD<sub>2</sub>Cl<sub>2</sub>, 298 K).

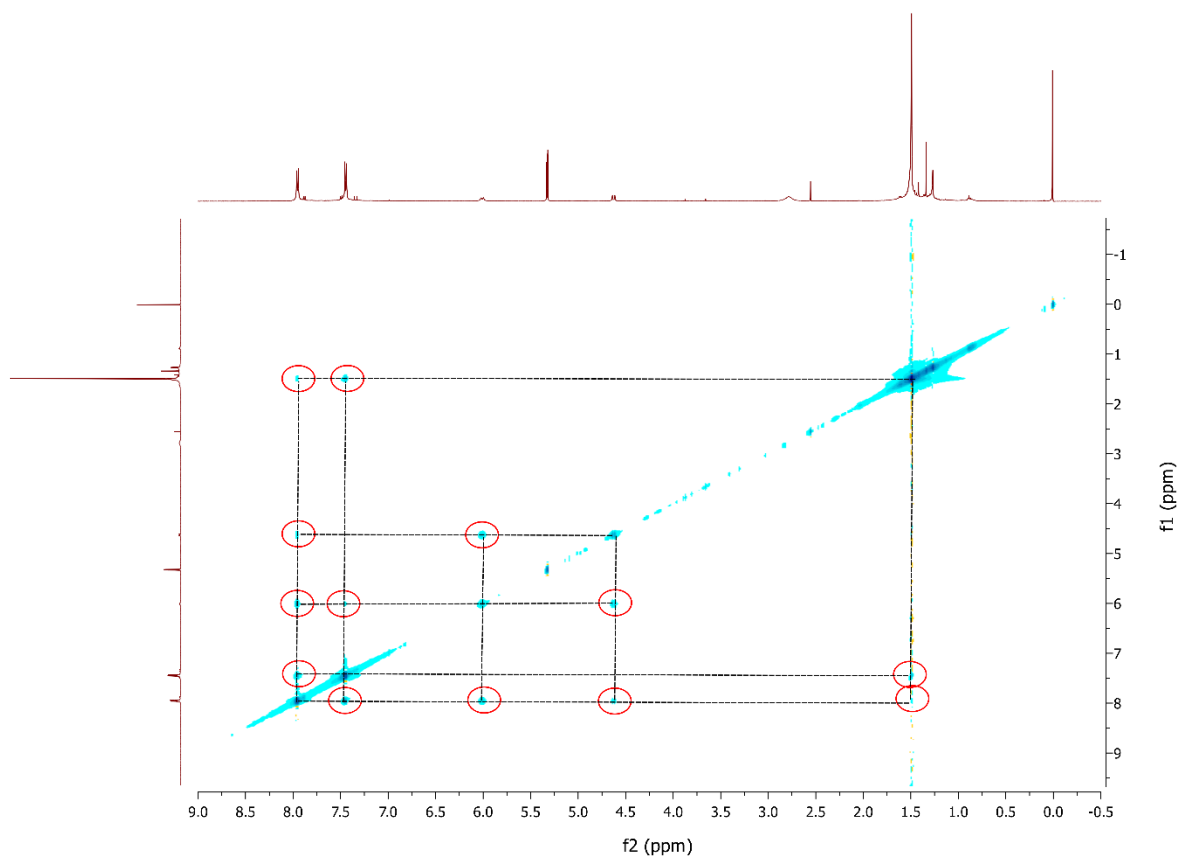

**Fig. S5** <sup>1</sup>H-<sup>1</sup>H NOESY spectrum of <sup>t</sup>BuPh<sub>8</sub>Dz<sub>4</sub>PzNi (CD<sub>2</sub>Cl<sub>2</sub>, 298 K).

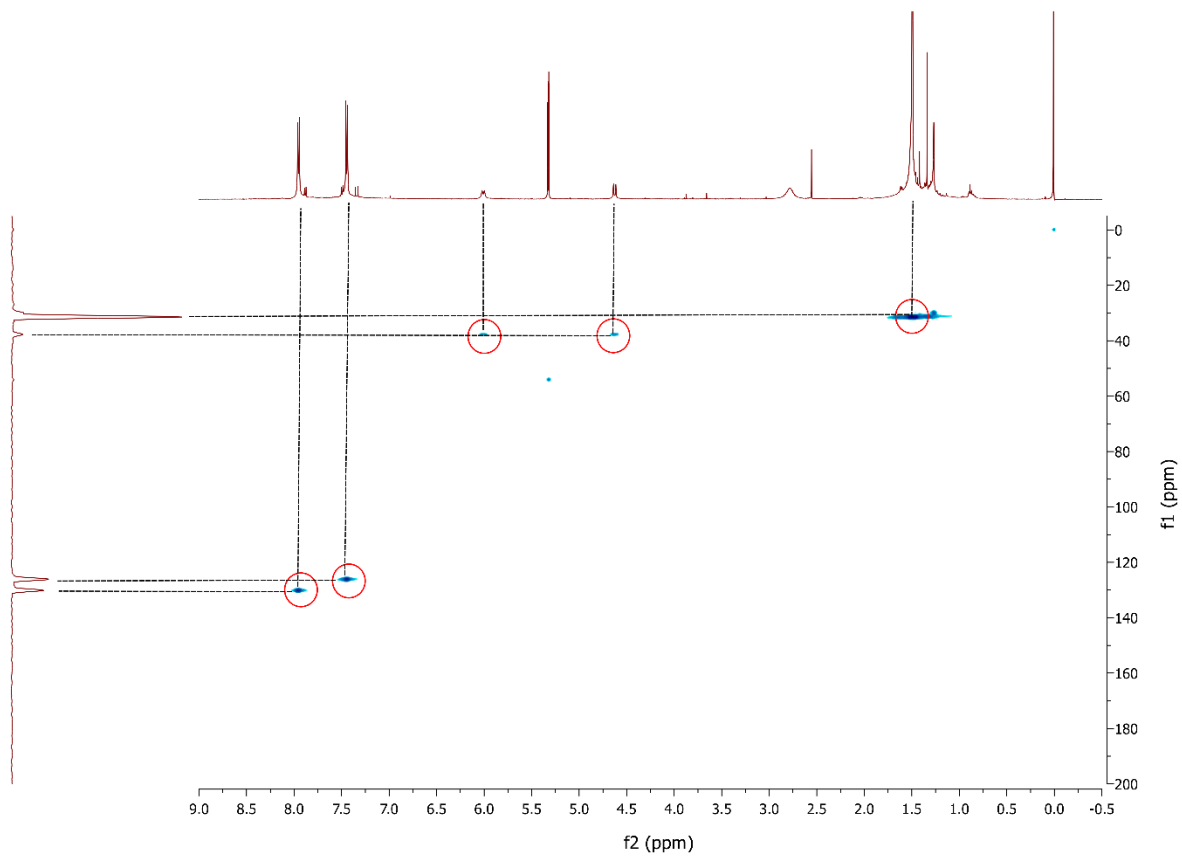

Fig. S6  $^1\text{H}$ - $^{13}\text{C}$  HMQC spectrum of  $^t\text{BuPh}_8\text{Dz}_4\text{PzNi}$  ( $\text{CD}_2\text{Cl}_2$ , 298 K).

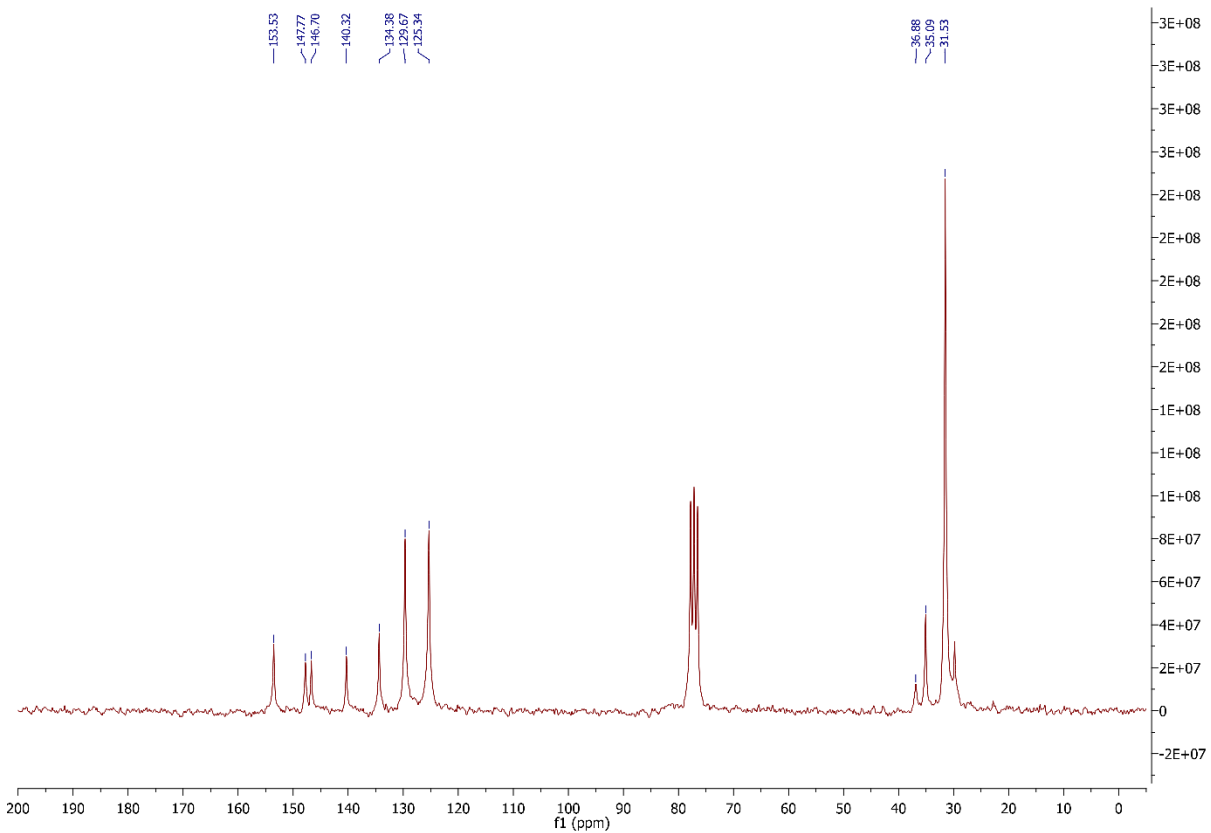

Fig. S7  $^{13}\text{C}$  NMR spectrum of  $^t\text{BuPh}_8\text{Dz}_4\text{PzNi}$  ( $\text{CDCl}_3$ , 298 K).

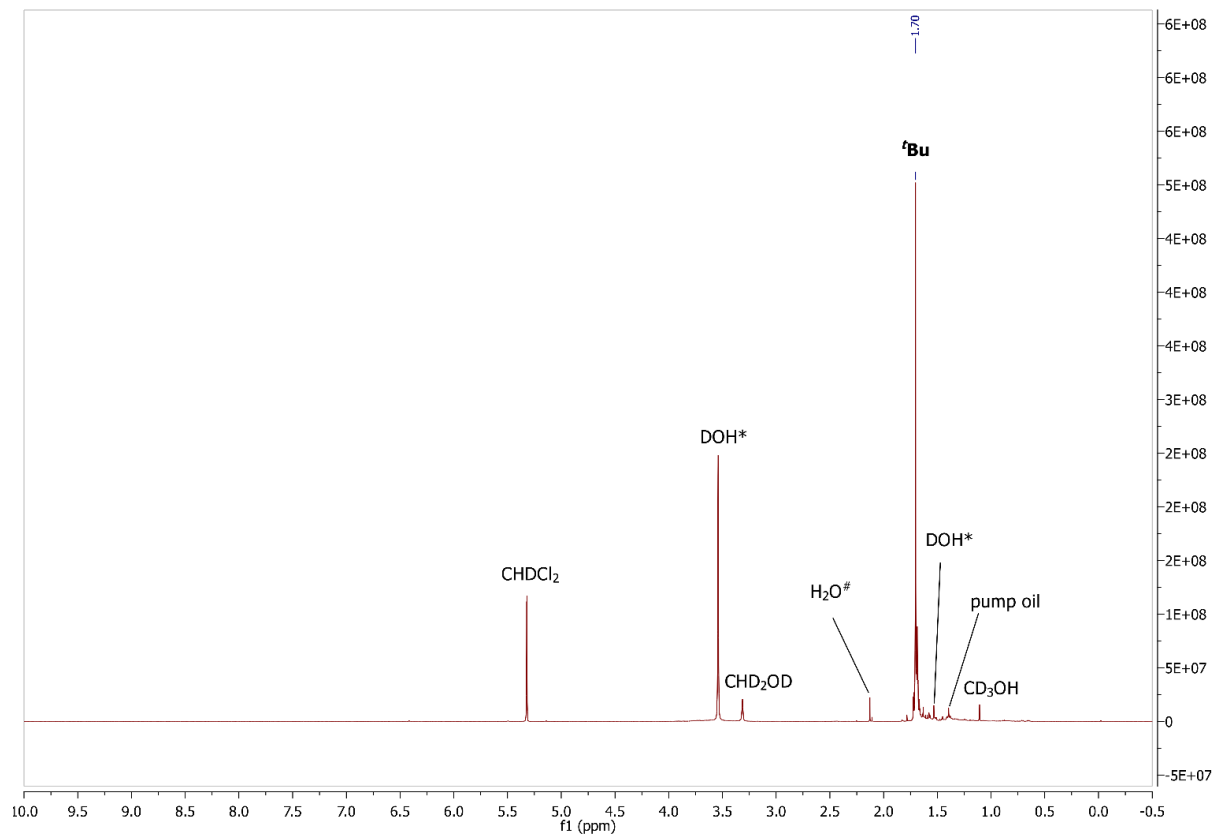

**Fig. S7a**  $^1\text{H}$  NMR spectrum of  $t\text{Bu}_8\text{Dz}_4\text{PzNi}$  ( $\text{CD}_2\text{Cl}_2$ , 298 K). DOH\* designates the signals of water surrounded by different solvation shells ( $\text{CD}_3\text{OD}$  or  $\text{CD}_2\text{Cl}_2$ ).  $\text{H}_2\text{O}^\#$  designates the signals of water molecules included into the structure of  $t\text{Bu}_8\text{Dz}_4\text{PzNi}$  via  $\text{HO}-\text{H}\cdots\text{N}^{\text{Dz}}$  hydrogen bonds.<sup>2</sup>

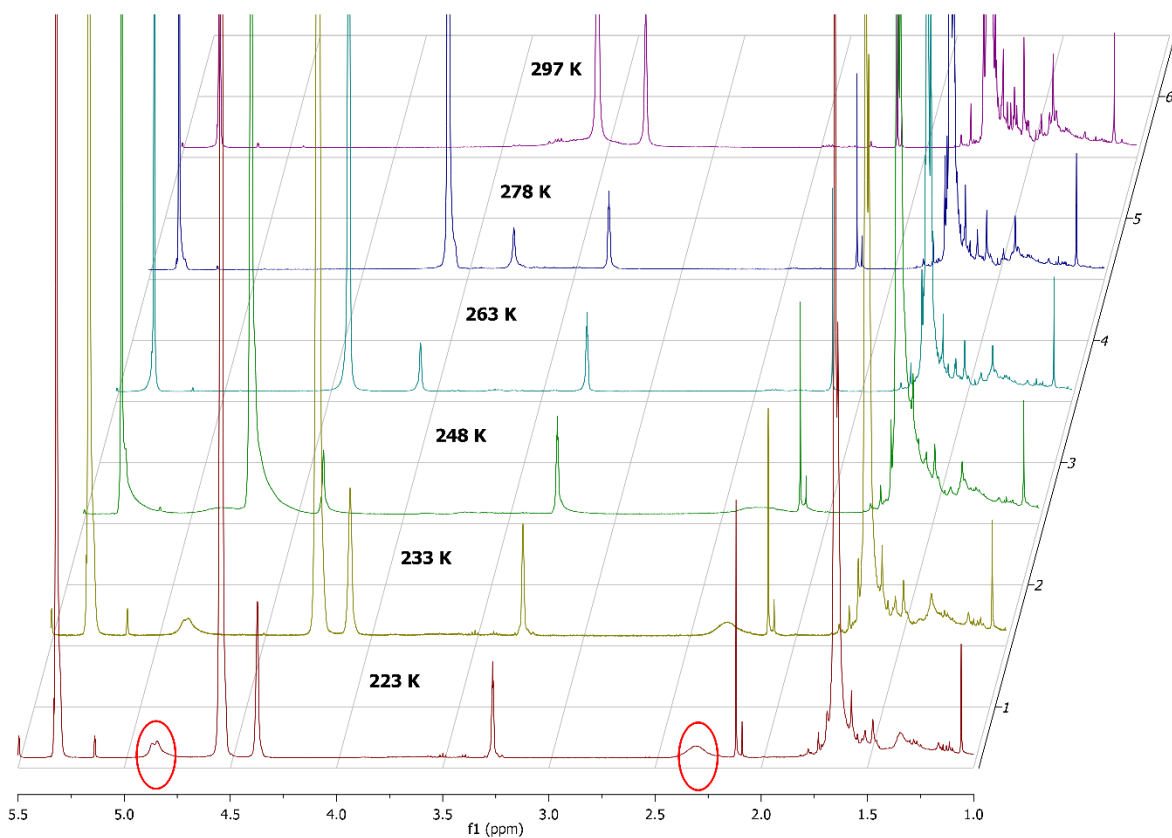

**Fig. S8** Temperature dependence of the  $^1\text{H}$  NMR spectra of  $t\text{Bu}_8\text{Dz}_4\text{PzNi}$  ( $\text{CD}_2\text{Cl}_2$ ).

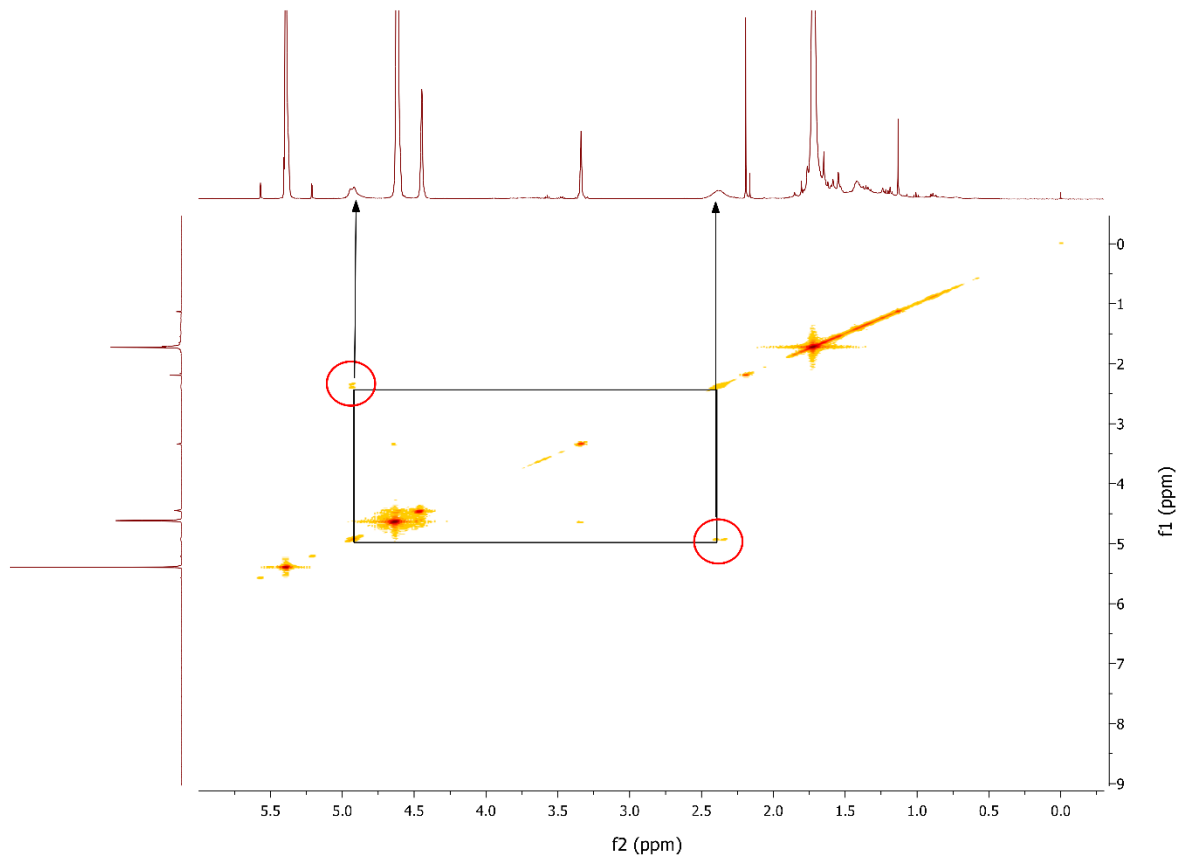

Fig. S9  $^1\text{H}$ - $^1\text{H}$  COSY spectrum of  $t\text{Bu}_8\text{Dz}_4\text{PzNi}$  ( $\text{CD}_2\text{Cl}_2$ , 223 K).

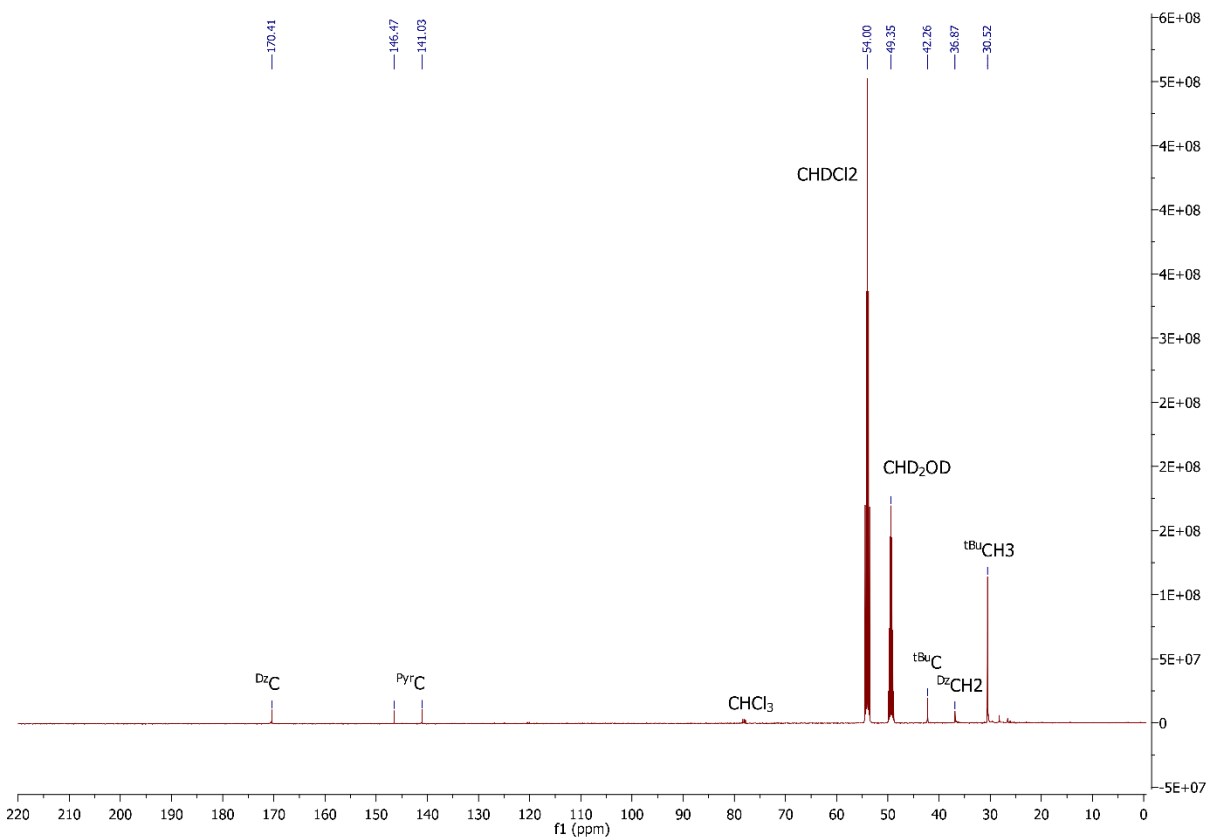

Fig. S10  $^{13}\text{C}$  NMR spectrum of  $t\text{Bu}_8\text{Dz}_4\text{PzNi}$  ( $\text{CD}_2\text{Cl}_2$ , 298 K).

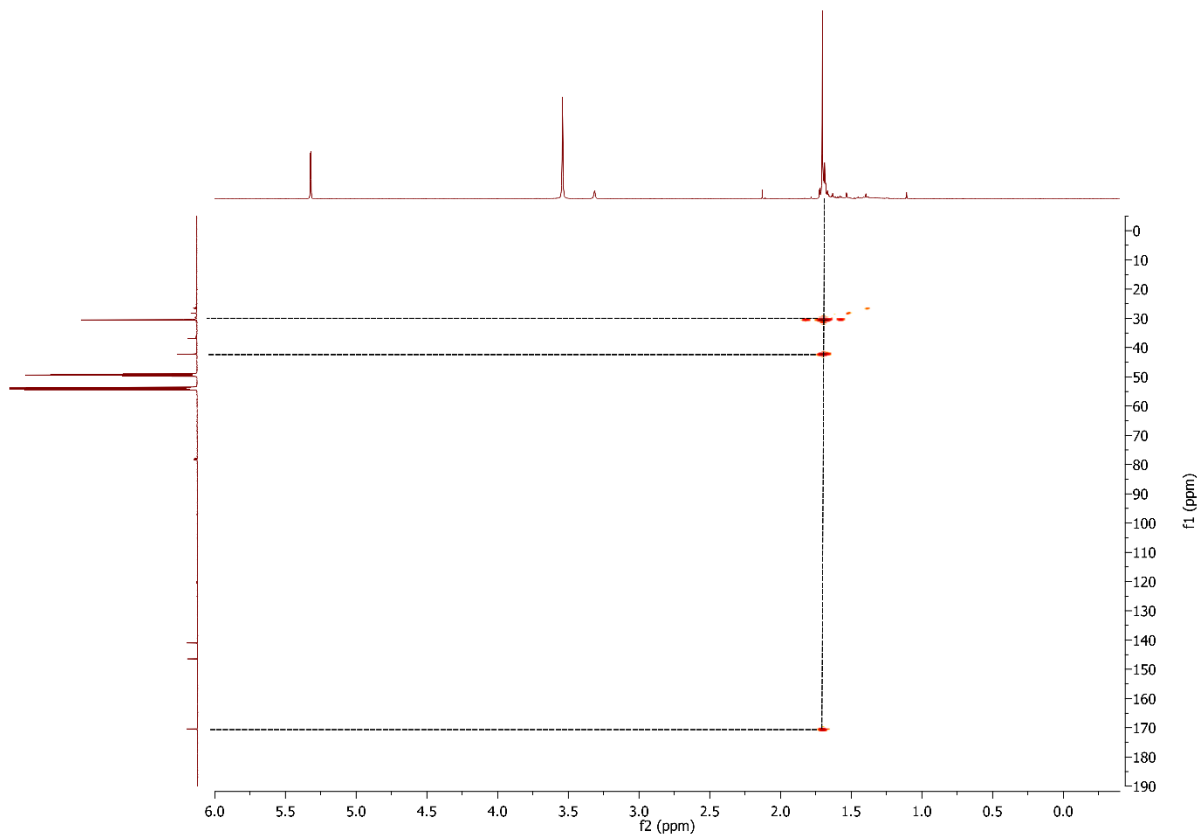

**Fig. S11**  $^1\text{H}$ - $^{13}\text{C}$  HMBC spectrum of  $t\text{Bu}_8\text{Dz}_4\text{PzNi}$  ( $\text{CD}_2\text{Cl}_2$ , 298 K).

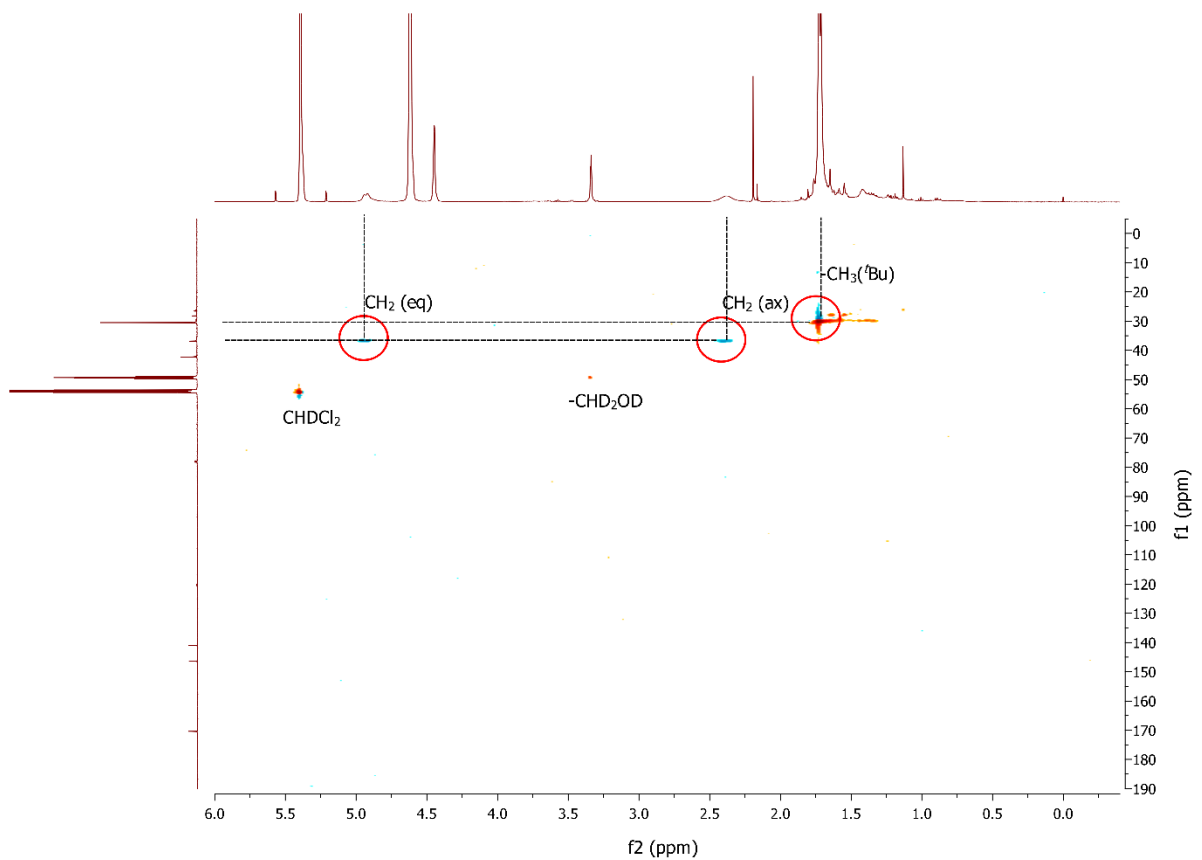

**Fig. S12**  $^1\text{H}$ - $^{13}\text{C}$  HSQC spectrum of  $t\text{Bu}_8\text{Dz}_4\text{PzNi}$  ( $\text{CD}_2\text{Cl}_2$ , 223 K).



**Table S1** Chemical shifts ( $\delta$ ) and temperature dependence of the diastereotopic proton resonances of 1,4-diazepine rings in 6*H*-1,4-diazepinoporphyrazines

| Compd                                                                                           | Solvent                         | Temp., K | $\delta$ , ppm  |                       |                 | References | Form of compd in solution <sup>b</sup> |
|-------------------------------------------------------------------------------------------------|---------------------------------|----------|-----------------|-----------------------|-----------------|------------|----------------------------------------|
|                                                                                                 |                                 |          | H <sup>eq</sup> | Coalescence           | H <sup>ax</sup> |            |                                        |
| <i>t</i> Bu <sub>2</sub> Dz(CN) <sub>2</sub>                                                    | CDCl <sub>3</sub>               | 273      | 4.6 (d)         |                       | 1.6 (d)         | 3          |                                        |
|                                                                                                 | pyridine- <i>d</i> <sub>5</sub> | 363      |                 | 3.36 (br s)           |                 |            |                                        |
| <i>t</i> Bu <sub>8</sub> Dz <sub>4</sub> PzMg                                                   | CD <sub>2</sub> Cl <sub>2</sub> | 223      | 4.9 (d)         |                       | 2.3 (d)         | 3          | monomer                                |
|                                                                                                 | pyridine- <i>d</i> <sub>5</sub> | 363      |                 | 3.7 (br s)            |                 |            |                                        |
| <i>t</i> Bu <sub>8</sub> Dz <sub>4</sub> PzNi                                                   | CD <sub>2</sub> Cl <sub>2</sub> | 223      | 4.9 (br d)      |                       | 2.4 (br s)      | tw         | monomer                                |
|                                                                                                 | CD <sub>2</sub> Cl <sub>2</sub> | 273      |                 | No signal ( $T_c^a$ ) |                 |            |                                        |
| <sup><i>t</i></sup> BuPh <sub>2</sub> Dz(CN) <sub>2</sub>                                       | CDCl <sub>3</sub>               | 293      | 5.73 (d)        |                       | 1.96 (d)        | 4          |                                        |
|                                                                                                 | pyridine- <i>d</i> <sub>5</sub> | 363      |                 | No signal ( $T_c$ )   |                 |            |                                        |
| [ <sup><i>t</i></sup> BuPh <sub>8</sub> Dz <sub>4</sub> PzH <sub>2</sub> ] <sub>2</sub>         | CD <sub>2</sub> Cl <sub>2</sub> | 293      | 6.10 (d)        | No coalescence        | 4.70 (d)        | 2,5        | dimer                                  |
| [ <sup><i>t</i></sup> BuPh <sub>8</sub> Dz <sub>4</sub> PzMg] <sub>2</sub>                      | DMSO- <i>d</i> <sub>6</sub>     | 293      | 5.93 (d)        | No coalescence        | 5.01 (d)        | 4          | dimer                                  |
| <sup><i>t</i></sup> BuPh <sub>8</sub> Dz <sub>4</sub> PzMg                                      | DMSO- <i>d</i> <sub>6</sub>     | 293      |                 | No signal ( $T_c$ )   |                 | 4          | monomer                                |
|                                                                                                 | DMF- <i>d</i> <sub>7</sub>      | 393      |                 | 4.50 (br, s)          |                 |            |                                        |
| [ <sup><i>t</i></sup> BuPh <sub>8</sub> Dz <sub>4</sub> PzNi] <sub>2</sub>                      | CD <sub>2</sub> Cl <sub>2</sub> | 293      | 6.0 (d)         | No coalescence        | 4.62 (d)        | tw         | dimer                                  |
| [ <sup><i>t</i></sup> BuPh <sub>8</sub> Dz <sub>4</sub> Pz] <sub>2</sub> La                     | CD <sub>2</sub> Cl <sub>2</sub> | 293      | 6.05            | No coalescence        | 4.69            | 2          | double-decker                          |
| [ <sup><i>t</i></sup> BuPh <sub>8</sub> Dz <sub>4</sub> Pz] <sub>2</sub> Ce                     | CD <sub>2</sub> Cl <sub>2</sub> | 293      | 6.18 (br s)     | No coalescence        | 5.13 (d)        | 2          | double-decker                          |
| [ <sup><i>t</i></sup> BuPh <sub>8</sub> Dz <sub>4</sub> Pz] <sub>2</sub> Lu                     | CD <sub>2</sub> Cl <sub>2</sub> | 293      | 6.02 (br s)     | No coalescence        | 5.13 (br s)     | 2          | double-decker                          |
| [ <sup><i>t</i></sup> BuPh <sub>8</sub> Dz <sub>4</sub> Pz] <sub>2</sub> La[Bu <sub>8</sub> Pc] | CD <sub>2</sub> Cl <sub>2</sub> | 293      | 6.41 (br s)     | No coalescence        | 4.03 (br s)     | 6          | double-decker                          |
| [ <sup><i>t</i></sup> BuPh <sub>8</sub> Dz <sub>4</sub> Pz] <sub>2</sub> Lu[Bu <sub>8</sub> Pc] | CD <sub>2</sub> Cl <sub>2</sub> | 293      | 6.61 (br s)     | No coalescence        | 5.19 (br s)     | 6          | double-decker                          |
| Ph <sub>2</sub> Dz(CN) <sub>2</sub>                                                             | CDCl <sub>3</sub>               | 293      | 5.74            |                       | 1.98            | 7          |                                        |
|                                                                                                 | DMSO- <i>d</i> <sub>6</sub>     | 343      |                 | No signal ( $T_c$ )   |                 |            |                                        |
| Ph <sub>2</sub> DzBz <sub>3</sub> PzMg                                                          | THF- <i>d</i> <sub>8</sub>      | 210      | 6.45            |                       | 2.55            | 8          | monomer                                |
|                                                                                                 | DMSO- <i>d</i> <sub>6</sub>     | 363      |                 | 4.42 (br, s)          |                 |            |                                        |
| [Ph <sub>8</sub> Dz <sub>4</sub> PzMg] <sub>2</sub>                                             | DMSO- <i>d</i> <sub>6</sub>     | 373      | 5.99 (d)        | No coalescence        | 5.06 (d)        | 7          | dimer                                  |
| [Ph <sub>8</sub> Dz <sub>4</sub> PzZn] <sub>2</sub>                                             | DMSO- <i>d</i> <sub>6</sub>     | 373      | 5.99 (d)        | No coalescence        | 5.03 (d)        | 7          | dimer                                  |
| MeO <sup><i>t</i></sup> Ph <sub>2</sub> Dz(CN) <sub>2</sub>                                     | DMSO- <i>d</i> <sub>6</sub>     | 293      | 6.10 (d)        |                       | 2.21 (d)        | 9          |                                        |
| [MeO <sup><i>t</i></sup> Ph <sub>8</sub> Dz <sub>4</sub> PzMg] <sub>2</sub>                     | pyridine- <i>d</i> <sub>5</sub> | 293      | 6.86 (d)        | No coalescence        | 6.07 (d)        | 9          | dimer                                  |
| MeO <sup><i>t</i></sup> Ph <sub>2</sub> DzBz <sub>3</sub> PzMg                                  | DMSO- <i>d</i> <sub>6</sub>     | 293      |                 | 4.59 (br, s)          |                 | 9          | monomer                                |
| (BnO) <sup>2</sup> BnO <sup><i>t</i></sup> Ph <sub>2</sub> Dz(CN) <sub>2</sub>                  | DMSO- <i>d</i> <sub>6</sub>     | 293      | 5.99            |                       | 2.21            | 10         |                                        |
| [ <sup>(BnO)</sup> 2BnO <sup><i>t</i></sup> Ph <sub>8</sub> Dz <sub>4</sub> PzMg] <sub>2</sub>  | DMSO- <i>d</i> <sub>6</sub>     | 293      | 5.96            | No coalescence        | 5.13            | 10         | dimer                                  |
| <sup>Br</sup> Styr <sub>2</sub> Dz(CN) <sub>2</sub>                                             | DMSO- <i>d</i> <sub>6</sub>     | 293      | 5.33 (br s)     |                       | 2.10 (br s)     | 11         |                                        |
| [ <sup>Br</sup> Styr <sub>8</sub> Dz <sub>4</sub> PzMg] <sub>2</sub>                            | DMSO- <i>d</i> <sub>6</sub>     | 293      | 6.11 (br s)     | No coalescence        | 4.77 (br s)     | 12         | dimer                                  |
| MeO <sup><i>t</i></sup> Styr <sub>2</sub> Dz(CN) <sub>2</sub>                                   | DMSO- <i>d</i> <sub>6</sub>     | 293      | 5.34 (br s)     |                       | 2.02 (br s)     | 13         |                                        |
| [MeO <sup><i>t</i></sup> Styr <sub>8</sub> Dz <sub>4</sub> PzMg] <sub>2</sub>                   | DMSO- <i>d</i> <sub>6</sub>     | 293      | 5.69 (br s)     | No coalescence        | 4.92 (d)        | 12         | dimer                                  |
| <sup>(MeO)</sup> 3Styr(Ph)Dz(CN) <sub>2</sub>                                                   | DMSO- <i>d</i> <sub>6</sub>     | 293      | 5.75 (br s)     |                       | 2.21 (br s)     | 14         |                                        |
| <sup>(MeO)</sup> 3Styr(Ph)DzBz <sub>3</sub> PzMg                                                | pyridine- <i>d</i> <sub>5</sub> | 293      |                 | No signal ( $T_c$ )   |                 | 14         | monomer                                |
| <sup>(MeO)</sup> 3Styr <sub>2</sub> Dz(CN) <sub>2</sub>                                         | CHCl <sub>3</sub>               | 293      | 4.96 (br s)     |                       | 1.83 (br s)     | 15         |                                        |
| [ <sup>(MeO)</sup> 3Styr <sub>8</sub> Dz <sub>4</sub> PzMg] <sub>2</sub>                        | pyridine- <i>d</i> <sub>5</sub> | 333      | 6.72 (d)        | No coalescence        | 6.07 (d)        | 15         | dimer                                  |

<sup>a</sup>  $T_c$  – coalescence temperature. <sup>b</sup> It is defined based on the character of the NMR signals of diastereotopic CH<sub>2</sub> protons.

**X-ray structure analysis of  $t^{\text{Bu}}\text{Ph}_8\text{Dz}_4\text{PzNi}$ :** Bruker AXS SMART 1000, CCD-detector  $\lambda(\text{MoK}\alpha) = 0.71073 \text{ \AA}$ , graphite monochromator,  $\omega$ -scanning,  $2\theta_{\text{max}} = 50^\circ$ . T=150.

The structure was solved by direct method and refined by full-matrix least squares method for  $F^2$  with anisotropic parameters for all non-hydrogen atoms. All calculations were performed with the use of the SHELXTL PLUS program packages [1-4].

1. SMART (control) and SAINT (integration) Software, Version 5.0, Bruker AXS Inc., Madison, WI, 1997.
2. SAINT: Area-Detector Integration Software. Bruker: Madison, 603 Wisconsin, USA, 2012.
3. Sheldrick G.M. SADABS. Program for scaling and Correction of Area Detector Data, University of Göttingen, 1997.
4. Sheldrick G.M.// Acta Crystallogr. C. 2015. V. 71. P. 3. doi.org/10.1107/S2053229614024218

**Special details:** Very weak crystals, no reflections are observed at  $2\theta > 46^\circ$ . The 16 tert-butyl substituents are completely disordered.

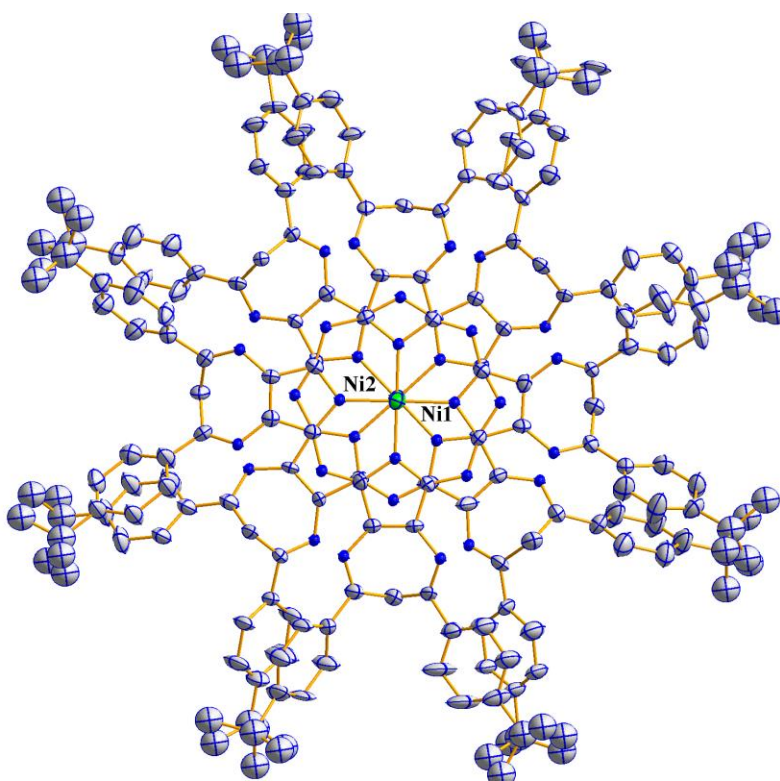

**Fig. S13** Molecular structure of  $t^{\text{Bu}}\text{Ph}_8\text{Dz}_4\text{PzNi}$  (50% ellipsoids).

**Table S2** Crystal data and structure refinement for  $t^{\text{Bu}}\text{Ph}_8\text{Dz}_4\text{PzNi}$

|                   |                                                      |
|-------------------|------------------------------------------------------|
| CCDC              | 2106082                                              |
| Empirical formula | $\text{C}_{108}\text{H}_{112}\text{N}_{16}\text{Ni}$ |
| Formula weight    | 1692.84                                              |
| Temperature       | 150(2) K                                             |
| Wavelength        | 0.71073                                              |
| Crystal system    | Triclinic                                            |
| Space group       | P-1                                                  |

|                                   |                                             |                              |
|-----------------------------------|---------------------------------------------|------------------------------|
| Unit cell dimensions              | a = 14.534(2) Å                             | $\alpha = 92.735(2)^\circ$ . |
|                                   | b = 25.961(4) Å                             | b = 97.846(2)°.              |
|                                   | c = 32.780(5) Å                             | g = 102.021(2)°.             |
| Volume                            | 11947(3) Å <sup>3</sup>                     |                              |
| Z                                 | 4                                           |                              |
| Density (calculated)              | 0.941 Mg/m <sup>3</sup>                     |                              |
| Absorption coefficient            | 0.207 mm <sup>-1</sup>                      |                              |
| F(000)                            | 3600                                        |                              |
| Crystal size                      | 0.14 x 0.12 x 0.10 mm <sup>3</sup>          |                              |
| Theta range for data collection   | 2.20 to 25.00°.                             |                              |
| Index ranges                      | -17<=h<=17, -30<=k<=30, -38<=l<=38          |                              |
| Reflections collected             | 97571                                       |                              |
| Independent reflections           | 41984 [R(int) = 0.2063]                     |                              |
| Completeness to theta = 25.00°    | 99.7 %                                      |                              |
| Refinement method                 | Full-matrix least-squares on F <sup>2</sup> |                              |
| Data / restraints / parameters    | 41984 / 46 / 1888                           |                              |
| Goodness-of-fit on F <sup>2</sup> | 1.049                                       |                              |
| Final R indices [I>2sigma(I)]     | R1 = 0.1267, wR2 = 0.2819                   |                              |
| R indices (all data)              | R1 = 0.3015, wR2 = 0.3479                   |                              |
| Largest diff. peak and hole       | 0.840 and -0.715 e.Å <sup>-3</sup>          |                              |

**Table S3** Bond lengths [Å] and angles [°] for <sup>180</sup>Ph<sub>8</sub>Dz<sub>4</sub>PzNi

|               |           |               |           |
|---------------|-----------|---------------|-----------|
| Ni(1)-N(5)    | 1.858(7)  | Ni(1)-N(1)    | 1.876(7)  |
| Ni(1)-N(7)    | 1.880(7)  | Ni(1)-N(3)    | 1.888(7)  |
| Ni(2)-N(21)   | 1.878(7)  | Ni(2)-N(19)   | 1.881(6)  |
| Ni(2)-N(23)   | 1.889(7)  | Ni(2)-N(17)   | 1.890(7)  |
| N(1)-C(84)    | 1.381(10) | N(1)-C(1)     | 1.406(9)  |
| N(2)-C(1)     | 1.302(10) | N(2)-C(2)     | 1.305(10) |
| N(3)-C(2)     | 1.355(9)  | N(3)-C(29)    | 1.383(10) |
| N(4)-C(29)    | 1.303(9)  | N(4)-C(30)    | 1.316(9)  |
| N(5)-C(30)    | 1.377(10) | N(5)-C(56)    | 1.378(10) |
| N(6)-C(57)    | 1.332(10) | N(6)-C(56)    | 1.340(10) |
| N(7)-C(57)    | 1.377(9)  | N(7)-C(83)    | 1.392(10) |
| N(8)-C(83)    | 1.311(10) | N(8)-C(84)    | 1.342(10) |
| N(9)-C(86)    | 1.287(10) | N(9)-C(85)    | 1.352(10) |
| N(10)-C(98)   | 1.303(10) | N(10)-C(109)  | 1.372(10) |
| N(11)-C(4)    | 1.314(10) | N(11)-C(3)    | 1.373(10) |
| N(12)-C(16)   | 1.286(10) | N(12)-C(28)   | 1.360(10) |
| N(13)-C(32)   | 1.283(10) | N(13)-C(31)   | 1.365(10) |
| N(14)-C(44)   | 1.275(10) | N(14)-C(55)   | 1.364(10) |
| N(15)-C(59)   | 1.310(10) | N(15)-C(58)   | 1.355(10) |
| N(16)-C(71)   | 1.298(10) | N(16)-C(82)   | 1.379(10) |
| N(17)-C(136)  | 1.350(10) | N(17)-C(110)  | 1.390(9)  |
| N(18)-C(137)  | 1.334(9)  | N(18)-C(136)  | 1.347(10) |
| N(19)-C(137)  | 1.349(10) | N(19)-C(163)  | 1.423(11) |
| N(20)-C(163)  | 1.280(12) | N(20)-C(164)  | 1.299(9)  |
| N(21)-C(190)  | 1.346(9)  | N(21)-C(164)  | 1.399(9)  |
| N(22)-C(190)  | 1.327(9)  | N(22)-C(191)  | 1.335(9)  |
| N(23)-C(191)  | 1.346(9)  | N(23)-C(216)  | 1.396(9)  |
| N(24)-C(216)  | 1.285(9)  | N(24)-C(110)  | 1.296(9)  |
| N(25)-C(112)  | 1.295(10) | N(25)-C(111)  | 1.381(10) |
| N(26)-C(124)  | 1.305(10) | N(26)-C(135)  | 1.362(10) |
| N(27)-C(139)  | 1.329(12) | N(27)-C(138)  | 1.370(11) |
| N(28)-C(151)  | 1.276(12) | N(28)-C(162)  | 1.364(11) |
| N(29)-C(166)  | 1.274(10) | N(29)-C(165)  | 1.371(9)  |
| N(30)-C(178)  | 1.299(11) | N(30)-C(189)  | 1.377(10) |
| N(31)-C(193)  | 1.319(10) | N(31)-C(192)  | 1.338(10) |
| N(32)-C(205)  | 1.311(10) | N(32)-C(215)  | 1.391(9)  |
| C(1)-C(109)   | 1.451(11) | C(2)-C(3)     | 1.447(11) |
| C(3)-C(28)    | 1.384(11) | C(4)-C(15)    | 1.486(13) |
| C(4)-C(5)     | 1.508(13) | C(5)-C(6)     | 1.339(13) |
| C(5)-C(14)    | 1.377(13) | C(6)-C(7)     | 1.393(14) |
| C(7)-C(8)     | 1.333(14) | C(8)-C(13)    | 1.357(15) |
| C(8)-C(9)     | 1.542(17) | C(13)-C(14)   | 1.398(15) |
| C(15)-C(16)   | 1.526(12) | C(16)-C(17)   | 1.478(12) |
| C(17)-C(27)   | 1.370(13) | C(17)-C(18)   | 1.416(13) |
| C(18)-C(19)   | 1.375(14) | C(19)-C(20)   | 1.352(15) |
| C(20)-C(26)   | 1.372(15) | C(20)-C(21)   | 1.610(18) |
| C(22)-C(214)  | 1.382(12) | C(22)-C(209)  | 1.390(14) |
| C(26)-C(27)   | 1.339(14) | C(28)-C(29)   | 1.485(11) |
| C(30)-C(31)   | 1.431(11) | C(31)-C(55)   | 1.375(11) |
| C(32)-C(33)   | 1.464(14) | C(32)-C(43)   | 1.600(13) |
| C(33)-C(34)   | 1.291(14) | C(33)-C(42)   | 1.371(14) |
| C(34)-C(35)   | 1.424(14) | C(35)-C(36)   | 1.306(13) |
| C(36)-C(41)   | 1.291(15) | C(36)-C(37)   | 1.516(17) |
| C(41)-C(42)   | 1.436(14) | C(43)-C(44)   | 1.567(12) |
| C(44)-C(45)   | 1.493(13) | C(45)-C(54)   | 1.344(12) |
| C(45)-C(46)   | 1.378(13) | C(46)-C(47)   | 1.393(14) |
| C(47)-C(48)   | 1.391(14) | C(48)-C(53)   | 1.392(14) |
| C(48)-C(49)   | 1.533(17) | C(53)-C(54)   | 1.364(14) |
| C(55)-C(56)   | 1.466(11) | C(57)-C(58)   | 1.465(11) |
| C(58)-C(82)   | 1.351(11) | C(59)-C(60)   | 1.482(12) |
| C(59)-C(70)   | 1.526(12) | C(60)-C(61)   | 1.370(13) |
| C(60)-C(69)   | 1.375(12) | C(61)-C(62)   | 1.363(12) |
| C(62)-C(63)   | 1.327(13) | C(63)-C(68)   | 1.387(13) |
| C(63)-C(64)   | 1.580(17) | C(68)-C(69)   | 1.415(13) |
| C(70)-C(71)   | 1.486(11) | C(71)-C(72)   | 1.471(12) |
| C(72)-C(73)   | 1.343(12) | C(72)-C(81)   | 1.363(12) |
| C(73)-C(74)   | 1.405(13) | C(74)-C(75)   | 1.307(13) |
| C(75)-C(80)   | 1.343(14) | C(75)-C(76)   | 1.556(17) |
| C(80)-C(81)   | 1.419(13) | C(82)-C(83)   | 1.439(11) |
| C(84)-C(85)   | 1.438(11) | C(85)-C(109)  | 1.404(11) |
| C(86)-C(87)   | 1.483(12) | C(86)-C(97)   | 1.484(11) |
| C(87)-C(88)   | 1.344(13) | C(87)-C(96)   | 1.391(12) |
| C(88)-C(89)   | 1.388(14) | C(89)-C(90)   | 1.359(16) |
| C(90)-C(95)   | 1.362(16) | C(90)-C(91)   | 1.498(18) |
| C(95)-C(96)   | 1.369(14) | C(97)-C(98)   | 1.542(12) |
| C(98)-C(99)   | 1.418(12) | C(99)-C(108)  | 1.343(13) |
| C(99)-C(100)  | 1.393(13) | C(100)-C(101) | 1.384(13) |
| C(101)-C(102) | 1.387(14) | C(102)-C(107) | 1.349(14) |
| C(102)-C(103) | 1.535(17) | C(107)-C(108) | 1.348(14) |
| C(110)-C(111) | 1.480(11) | C(111)-C(135) | 1.349(11) |
| C(112)-C(123) | 1.489(12) | C(112)-C(113) | 1.510(12) |
| C(113)-C(114) | 1.336(12) | C(113)-C(122) | 1.378(12) |
| C(114)-C(115) | 1.399(12) | C(115)-C(116) | 1.358(14) |
| C(116)-C(121) | 1.380(13) | C(116)-C(117) | 1.537(13) |
| C(117)-C(18A) | 1.496(16) | C(117)-C(19A) | 1.496(15) |
| C(117)-C(20A) | 1.496(16) | C(117)-C(119) | 1.574(16) |
| C(117)-C(118) | 1.574(16) | C(117)-C(120) | 1.574(16) |
| C(121)-C(122) | 1.429(13) | C(123)-C(124) | 1.533(12) |
| C(124)-C(125) | 1.475(12) | C(125)-C(134) | 1.360(12) |
| C(125)-C(126) | 1.367(13) | C(126)-C(127) | 1.400(14) |
| C(127)-C(128) | 1.355(13) | C(128)-C(133) | 1.373(14) |
| C(128)-C(129) | 1.577(18) | C(133)-C(134) | 1.358(13) |
| C(135)-C(136) | 1.441(11) | C(137)-C(138) | 1.446(11) |

|               |           |               |            |
|---------------|-----------|---------------|------------|
| C(138)-C(162) | 1.361(13) | C(139)-C(140) | 1.470(13)  |
| C(139)-C(150) | 1.580(14) | C(140)-C(141) | 1.272(14)  |
| C(140)-C(149) | 1.388(14) | C(141)-C(142) | 1.432(15)  |
| C(142)-C(143) | 1.367(16) | C(143)-C(148) | 1.342(15)  |
| C(143)-C(144) | 1.563(18) | C(148)-C(149) | 1.423(15)  |
| C(150)-C(151) | 1.597(14) | C(151)-C(152) | 1.482(12)  |
| C(152)-C(153) | 1.331(12) | C(152)-C(161) | 1.3693(10) |
| C(153)-C(154) | 1.399(13) | C(154)-C(155) | 1.306(14)  |
| C(155)-C(160) | 1.305(13) | C(155)-C(156) | 1.590(17)  |
| C(160)-C(161) | 1.398(12) | C(162)-C(163) | 1.432(14)  |
| C(164)-C(165) | 1.480(11) | C(165)-C(189) | 1.389(10)  |
| C(166)-C(167) | 1.506(11) | C(166)-C(177) | 1.521(12)  |
| C(167)-C(168) | 1.367(13) | C(167)-C(176) | 1.370(12)  |
| C(168)-C(169) | 1.355(13) | C(169)-C(170) | 1.375(15)  |
| C(170)-C(175) | 1.354(14) | C(170)-C(171) | 1.526(17)  |
| C(175)-C(176) | 1.403(13) | C(177)-C(178) | 1.494(12)  |
| C(178)-C(179) | 1.468(13) | C(179)-C(180) | 1.320(12)  |
| C(179)-C(188) | 1.331(14) | C(180)-C(181) | 1.406(13)  |
| C(181)-C(182) | 1.360(15) | C(182)-C(187) | 1.328(15)  |
| C(182)-C(183) | 1.512(17) | C(187)-C(188) | 1.390(14)  |
| C(189)-C(190) | 1.430(10) | C(191)-C(192) | 1.465(11)  |
| C(192)-C(215) | 1.376(11) | C(193)-C(194) | 1.483(12)  |
| C(193)-C(204) | 1.483(11) | C(194)-C(195) | 1.355(13)  |
| C(194)-C(203) | 1.363(13) | C(195)-C(196) | 1.344(14)  |
| C(196)-C(197) | 1.358(15) | C(197)-C(202) | 1.333(15)  |
| C(197)-C(198) | 1.561(18) | C(202)-C(203) | 1.368(14)  |
| C(204)-C(205) | 1.494(12) | C(205)-C(206) | 1.497(12)  |
| C(206)-C(207) | 1.358(12) | C(206)-C(214) | 1.406(13)  |
| C(207)-C(208) | 1.404(12) | C(208)-C(209) | 1.338(14)  |
| C(209)-C(210) | 1.564(17) | C(215)-C(216) | 1.440(10)  |
| C(9)-C(12)    | 1.514(10) | C(9)-C(11)    | 1.514(10)  |
| C(9)-C(10)    | 1.514(11) | C(9)-C(10A)   | 1.56(3)    |
| C(21)-C(23A)  | 1.43(3)   | C(21)-C(24)   | 1.526(11)  |
| C(21)-C(23)   | 1.526(11) | C(21)-C(25)   | 1.527(11)  |
| C(37)-C(40)   | 1.480(9)  | C(37)-C(38)   | 1.480(9)   |
| C(37)-C(39)   | 1.480(9)  | C(49)-C(50)   | 1.505(9)   |
| C(49)-C(52)   | 1.506(9)  | C(49)-C(51)   | 1.507(9)   |
| C(64)-C(67)   | 1.441(17) | C(64)-C(66)   | 1.496(18)  |
| C(64)-C(65)   | 1.588(18) | C(76)-C(77)   | 1.441(17)  |
| C(76)-C(79)   | 1.465(17) | C(76)-C(78)   | 1.476(18)  |
| C(91)-C(92A)  | 1.40(3)   | C(91)-C(93A)  | 1.44(3)    |
| C(91)-C(94)   | 1.535(17) | C(91)-C(93)   | 1.535(17)  |
| C(91)-C(92)   | 1.535(17) | C(91)-C(94A)  | 1.57(3)    |
| C(103)-C(104) | 1.480(9)  | C(103)-C(106) | 1.481(9)   |
| C(103)-C(105) | 1.481(9)  | C(129)-C(130) | 1.496(9)   |
| C(129)-C(132) | 1.498(9)  | C(129)-C(131) | 1.498(9)   |
| C(144)-C(145) | 1.480(8)  | C(144)-C(146) | 1.480(8)   |
| C(144)-C(147) | 1.481(8)  | C(156)-C(159) | 1.437(18)  |
| C(156)-C(157) | 1.448(18) | C(156)-C(158) | 1.473(17)  |
| C(171)-C(172) | 1.451(9)  | C(171)-C(174) | 1.451(9)   |
| C(171)-C(173) | 1.452(9)  | C(183)-C(184) | 1.517(9)   |
| C(183)-C(186) | 1.517(9)  | C(183)-C(185) | 1.517(9)   |
| C(198)-C(201) | 1.503(9)  | C(198)-C(199) | 1.504(9)   |
| C(198)-C(200) | 1.504(9)  | C(210)-C(03A) | 1.456(18)  |
| C(210)-C(02A) | 1.456(18) | C(210)-C(01A) | 1.457(18)  |
| C(210)-C(213) | 1.510(18) | C(210)-C(211) | 1.511(18)  |
| C(210)-C(212) | 1.511(18) |               |            |

|                     |           |                     |           |
|---------------------|-----------|---------------------|-----------|
| N(5)-Ni(1)-N(1)     | 178.8(3)  | N(5)-Ni(1)-N(7)     | 90.4(3)   |
| N(1)-Ni(1)-N(7)     | 89.9(3)   | N(5)-Ni(1)-N(3)     | 89.6(3)   |
| N(1)-Ni(1)-N(3)     | 90.0(3)   | N(7)-Ni(1)-N(3)     | 177.5(3)  |
| N(21)-Ni(2)-N(19)   | 90.9(3)   | N(21)-Ni(2)-N(23)   | 88.8(3)   |
| N(19)-Ni(2)-N(23)   | 178.5(3)  | N(21)-Ni(2)-N(17)   | 178.0(3)  |
| N(19)-Ni(2)-N(17)   | 89.7(3)   | N(23)-Ni(2)-N(17)   | 90.5(3)   |
| C(84)-N(1)-C(1)     | 105.2(7)  | C(84)-N(1)-Ni(1)    | 128.6(6)  |
| C(1)-N(1)-Ni(1)     | 126.1(6)  | C(1)-N(2)-C(2)      | 120.0(7)  |
| C(2)-N(3)-C(29)     | 106.7(7)  | C(2)-N(3)-Ni(1)     | 127.0(6)  |
| C(29)-N(3)-Ni(1)    | 126.2(6)  | C(29)-N(4)-C(30)    | 120.2(7)  |
| C(30)-N(5)-C(56)    | 103.9(7)  | C(30)-N(5)-Ni(1)    | 128.6(5)  |
| C(56)-N(5)-Ni(1)    | 127.4(6)  | C(57)-N(6)-C(56)    | 119.0(7)  |
| C(57)-N(7)-C(83)    | 105.0(7)  | C(57)-N(7)-Ni(1)    | 127.5(6)  |
| C(83)-N(7)-Ni(1)    | 127.4(6)  | C(83)-N(8)-C(84)    | 121.6(8)  |
| C(86)-N(9)-C(85)    | 119.0(8)  | C(98)-N(10)-C(109)  | 121.4(8)  |
| C(4)-N(11)-C(3)     | 116.4(8)  | C(16)-N(12)-C(28)   | 118.3(8)  |
| C(32)-N(13)-C(31)   | 120.2(8)  | C(44)-N(14)-C(55)   | 116.3(8)  |
| C(59)-N(15)-C(58)   | 117.9(8)  | C(71)-N(16)-C(82)   | 117.6(8)  |
| C(136)-N(17)-C(110) | 106.8(7)  | C(136)-N(17)-Ni(2)  | 128.0(6)  |
| C(110)-N(17)-Ni(2)  | 125.1(6)  | C(137)-N(18)-C(136) | 119.7(7)  |
| C(137)-N(19)-C(163) | 105.9(8)  | C(137)-N(19)-Ni(2)  | 127.7(5)  |
| C(163)-N(19)-Ni(2)  | 126.4(7)  | C(163)-N(20)-C(164) | 121.5(8)  |
| C(190)-N(21)-C(164) | 105.2(7)  | C(190)-N(21)-Ni(2)  | 129.6(5)  |
| C(164)-N(21)-Ni(2)  | 125.2(6)  | C(190)-N(22)-C(191) | 121.2(7)  |
| C(191)-N(23)-C(216) | 105.8(7)  | C(191)-N(23)-Ni(2)  | 128.0(5)  |
| C(216)-N(23)-Ni(2)  | 126.2(6)  | C(216)-N(24)-C(110) | 120.5(7)  |
| C(112)-N(25)-C(111) | 116.9(8)  | C(124)-N(26)-C(135) | 118.7(7)  |
| C(139)-N(27)-C(138) | 116.3(8)  | C(151)-N(28)-C(162) | 117.6(8)  |
| C(166)-N(29)-C(165) | 116.6(7)  | C(178)-N(30)-C(189) | 117.2(8)  |
| C(193)-N(31)-C(192) | 117.2(8)  | C(205)-N(32)-C(215) | 116.5(7)  |
| N(2)-C(1)-N(1)      | 127.9(8)  | N(2)-C(1)-C(109)    | 123.0(8)  |
| N(1)-C(1)-C(109)    | 108.9(8)  | N(2)-C(2)-N(3)      | 128.9(8)  |
| N(2)-C(2)-C(3)      | 119.5(8)  | N(3)-C(2)-C(3)      | 111.6(7)  |
| N(11)-C(3)-C(28)    | 128.3(8)  | N(11)-C(3)-C(2)     | 123.8(8)  |
| C(28)-C(3)-C(2)     | 106.6(8)  | N(11)-C(4)-C(15)    | 121.7(8)  |
| N(11)-C(4)-C(5)     | 116.2(9)  | C(15)-C(4)-C(5)     | 122.1(9)  |
| C(6)-C(5)-C(14)     | 116.9(11) | C(6)-C(5)-C(4)      | 121.1(10) |

|                      |           |                      |           |
|----------------------|-----------|----------------------|-----------|
| C(14)-C(5)-C(4)      | 122.0(11) | C(5)-C(6)-C(7)       | 123.0(12) |
| C(8)-C(7)-C(6)       | 121.6(12) | C(7)-C(8)-C(13)      | 115.7(10) |
| C(7)-C(8)-C(9)       | 121.3(12) | C(13)-C(8)-C(9)      | 122.7(12) |
| C(8)-C(13)-C(14)     | 124.0(11) | C(5)-C(14)-C(13)     | 118.6(12) |
| C(4)-C(15)-C(16)     | 106.8(9)  | N(12)-C(16)-C(17)    | 118.3(9)  |
| N(12)-C(16)-C(15)    | 120.3(9)  | C(17)-C(16)-C(15)    | 121.4(9)  |
| C(27)-C(17)-C(18)    | 115.7(10) | C(27)-C(17)-C(16)    | 120.8(10) |
| C(18)-C(17)-C(16)    | 123.5(11) | C(19)-C(18)-C(17)    | 121.5(11) |
| C(20)-C(19)-C(18)    | 120.2(11) | C(19)-C(20)-C(26)    | 118.1(11) |
| C(19)-C(20)-C(21)    | 118.9(12) | C(26)-C(20)-C(21)    | 122.7(13) |
| C(214)-C(22)-C(209)  | 122.3(11) | C(27)-C(26)-C(20)    | 122.7(12) |
| C(26)-C(27)-C(17)    | 121.5(10) | N(12)-C(28)-C(3)     | 132.2(8)  |
| N(12)-C(28)-C(29)    | 122.1(8)  | C(3)-C(28)-C(29)     | 105.6(8)  |
| N(4)-C(29)-N(3)      | 128.3(8)  | N(4)-C(29)-C(28)     | 121.9(8)  |
| N(3)-C(29)-C(28)     | 109.4(8)  | N(4)-C(30)-N(5)      | 126.7(8)  |
| N(4)-C(30)-C(31)     | 121.5(8)  | N(5)-C(30)-C(31)     | 111.8(7)  |
| N(13)-C(31)-C(55)    | 128.7(9)  | N(13)-C(31)-C(30)    | 123.4(8)  |
| C(55)-C(31)-C(30)    | 107.8(8)  | N(13)-C(32)-C(33)    | 120.0(9)  |
| N(13)-C(32)-C(43)    | 119.5(8)  | C(33)-C(32)-C(43)    | 120.5(9)  |
| C(34)-C(33)-C(42)    | 116.5(12) | C(34)-C(33)-C(32)    | 119.5(11) |
| C(42)-C(33)-C(32)    | 123.7(12) | C(33)-C(34)-C(35)    | 120.2(12) |
| C(36)-C(35)-C(34)    | 125.1(11) | C(41)-C(36)-C(35)    | 114.4(12) |
| C(41)-C(36)-C(37)    | 120.1(12) | C(35)-C(36)-C(37)    | 125.1(12) |
| C(36)-C(41)-C(42)    | 123.2(12) | C(33)-C(42)-C(41)    | 119.9(11) |
| C(44)-C(43)-C(32)    | 102.8(8)  | N(14)-C(44)-C(45)    | 118.6(10) |
| N(14)-C(44)-C(43)    | 122.3(8)  | C(45)-C(44)-C(43)    | 119.0(9)  |
| C(54)-C(45)-C(46)    | 117.2(10) | C(54)-C(45)-C(44)    | 122.0(10) |
| C(46)-C(45)-C(44)    | 120.7(11) | C(45)-C(46)-C(47)    | 118.0(11) |
| C(48)-C(47)-C(46)    | 125.5(11) | C(47)-C(48)-C(53)    | 113.4(10) |
| C(47)-C(48)-C(49)    | 122.7(12) | C(53)-C(48)-C(49)    | 123.8(12) |
| C(54)-C(53)-C(48)    | 120.8(12) | C(45)-C(54)-C(53)    | 124.9(11) |
| N(14)-C(55)-C(31)    | 131.1(9)  | N(14)-C(55)-C(56)    | 124.1(8)  |
| C(31)-C(55)-C(56)    | 104.1(8)  | N(6)-C(56)-N(5)      | 128.2(8)  |
| N(6)-C(56)-C(55)     | 119.4(8)  | N(5)-C(56)-C(55)     | 112.4(8)  |
| N(6)-C(57)-N(7)      | 127.3(8)  | N(6)-C(57)-C(58)     | 122.2(8)  |
| N(7)-C(57)-C(58)     | 110.5(8)  | C(82)-C(58)-N(15)    | 130.8(8)  |
| C(82)-C(58)-C(57)    | 106.3(7)  | N(15)-C(58)-C(57)    | 122.4(8)  |
| N(15)-C(59)-C(60)    | 119.9(9)  | N(15)-C(59)-C(70)    | 118.7(7)  |
| C(60)-C(59)-C(70)    | 121.3(9)  | C(61)-C(60)-C(69)    | 118.7(9)  |
| C(61)-C(60)-C(59)    | 120.1(9)  | C(69)-C(60)-C(59)    | 121.2(10) |
| C(62)-C(61)-C(60)    | 121.8(11) | C(63)-C(62)-C(61)    | 122.3(11) |
| C(62)-C(63)-C(68)    | 117.0(9)  | C(62)-C(63)-C(64)    | 121.3(12) |
| C(68)-C(63)-C(64)    | 121.6(11) | C(63)-C(68)-C(69)    | 122.3(10) |
| C(60)-C(69)-C(68)    | 117.7(11) | C(71)-C(70)-C(59)    | 107.9(8)  |
| N(16)-C(71)-C(72)    | 118.6(9)  | N(16)-C(71)-C(70)    | 119.5(8)  |
| C(72)-C(71)-C(70)    | 121.8(8)  | C(73)-C(72)-C(81)    | 116.3(9)  |
| C(73)-C(72)-C(71)    | 124.8(10) | C(81)-C(72)-C(71)    | 118.9(9)  |
| C(72)-C(73)-C(74)    | 120.5(10) | C(75)-C(74)-C(73)    | 123.8(11) |
| C(74)-C(75)-C(80)    | 117.2(10) | C(74)-C(75)-C(76)    | 121.0(12) |
| C(80)-C(75)-C(76)    | 121.9(13) | C(75)-C(80)-C(81)    | 120.4(11) |
| C(72)-C(81)-C(80)    | 121.7(10) | C(58)-C(82)-N(16)    | 130.3(8)  |
| C(58)-C(82)-C(83)    | 107.5(8)  | N(16)-C(82)-C(83)    | 121.7(8)  |
| N(8)-C(83)-N(7)      | 126.9(8)  | N(8)-C(83)-C(82)     | 122.3(8)  |
| N(7)-C(83)-C(82)     | 110.6(8)  | N(8)-C(84)-N(1)      | 125.4(8)  |
| N(8)-C(84)-C(85)     | 121.4(8)  | N(1)-C(84)-C(85)     | 113.1(8)  |
| N(9)-C(85)-C(109)    | 130.2(8)  | N(9)-C(85)-C(84)     | 125.0(8)  |
| C(109)-C(85)-C(84)   | 104.1(8)  | N(9)-C(86)-C(87)     | 116.5(9)  |
| N(9)-C(86)-C(97)     | 120.1(8)  | C(87)-C(86)-C(97)    | 122.8(9)  |
| C(88)-C(87)-C(96)    | 117.5(10) | C(88)-C(87)-C(86)    | 121.3(10) |
| C(96)-C(87)-C(86)    | 121.1(10) | C(87)-C(88)-C(89)    | 121.1(12) |
| C(90)-C(89)-C(88)    | 122.4(12) | C(89)-C(90)-C(95)    | 115.4(11) |
| C(89)-C(90)-C(91)    | 121.8(15) | C(95)-C(90)-C(91)    | 122.8(14) |
| C(90)-C(95)-C(96)    | 123.9(12) | C(95)-C(96)-C(87)    | 119.4(11) |
| C(86)-C(97)-C(98)    | 108.2(8)  | N(10)-C(98)-C(99)    | 120.5(9)  |
| N(10)-C(98)-C(97)    | 115.9(8)  | C(99)-C(98)-C(97)    | 123.5(9)  |
| C(108)-C(99)-C(100)  | 115.9(10) | C(108)-C(99)-C(98)   | 122.0(11) |
| C(100)-C(99)-C(98)   | 122.0(12) | C(101)-C(100)-C(99)  | 121.1(11) |
| C(100)-C(101)-C(102) | 120.6(11) | C(107)-C(102)-C(101) | 116.5(11) |
| C(107)-C(102)-C(103) | 121.8(13) | C(101)-C(102)-C(103) | 121.5(12) |
| C(102)-C(107)-C(108) | 122.6(12) | C(99)-C(108)-C(107)  | 123.2(12) |
| N(10)-C(109)-C(85)   | 126.7(8)  | N(10)-C(109)-C(1)    | 123.7(8)  |
| C(85)-C(109)-C(1)    | 108.5(8)  | N(24)-C(110)-N(17)   | 129.4(8)  |
| N(24)-C(110)-C(111)  | 122.7(8)  | N(17)-C(110)-C(111)  | 107.8(8)  |
| C(135)-C(111)-N(25)  | 131.0(8)  | C(135)-C(111)-C(110) | 107.2(8)  |
| N(25)-C(111)-C(110)  | 121.2(8)  | N(25)-C(112)-C(123)  | 121.7(8)  |
| N(25)-C(112)-C(113)  | 116.2(9)  | C(123)-C(112)-C(113) | 122.0(9)  |
| C(114)-C(113)-C(122) | 119.1(9)  | C(114)-C(113)-C(112) | 119.9(9)  |
| C(122)-C(113)-C(112) | 121.0(10) | C(113)-C(114)-C(115) | 120.6(10) |
| C(116)-C(115)-C(114) | 121.5(11) | C(115)-C(116)-C(121) | 119.6(10) |
| C(115)-C(116)-C(117) | 121.5(12) | C(121)-C(116)-C(117) | 118.9(11) |
| C(18A)-C(117)-C(19A) | 108.5(16) | C(18A)-C(117)-C(20A) | 112.8(17) |
| C(19A)-C(117)-C(20A) | 103.3(17) | C(18A)-C(117)-C(116) | 107.3(12) |
| C(19A)-C(117)-C(116) | 114.1(13) | C(20A)-C(117)-C(116) | 110.9(12) |
| C(116)-C(117)-C(119) | 108.9(11) | C(116)-C(117)-C(118) | 111.2(12) |
| C(119)-C(117)-C(118) | 107.9(16) | C(116)-C(117)-C(120) | 108.9(12) |
| C(119)-C(117)-C(120) | 106.7(16) | C(118)-C(117)-C(120) | 113.1(16) |
| C(116)-C(121)-C(122) | 117.7(10) | C(113)-C(122)-C(121) | 121.3(11) |
| C(112)-C(123)-C(124) | 107.9(8)  | N(26)-C(124)-C(125)  | 119.5(9)  |
| N(26)-C(124)-C(123)  | 120.1(8)  | C(125)-C(124)-C(123) | 120.3(8)  |
| C(134)-C(125)-C(126) | 117.4(9)  | C(134)-C(125)-C(124) | 119.4(10) |
| C(126)-C(125)-C(124) | 123.0(10) | C(125)-C(126)-C(127) | 119.5(11) |
| C(128)-C(127)-C(126) | 121.4(10) | C(127)-C(128)-C(133) | 118.3(10) |
| C(127)-C(128)-C(129) | 119.8(11) | C(133)-C(128)-C(129) | 121.7(11) |
| C(134)-C(133)-C(128) | 119.8(11) | C(133)-C(134)-C(125) | 123.1(11) |
| C(111)-C(135)-N(26)  | 129.9(8)  | C(111)-C(135)-C(136) | 106.7(8)  |
| N(26)-C(135)-C(136)  | 122.8(8)  | N(18)-C(136)-N(17)   | 126.9(8)  |
| N(18)-C(136)-C(135)  | 121.6(8)  | N(17)-C(136)-C(135)  | 111.3(7)  |

|                      |           |                      |           |
|----------------------|-----------|----------------------|-----------|
| N(18)-C(137)-N(19)   | 127.9(7)  | N(18)-C(137)-C(138)  | 120.5(8)  |
| N(19)-C(137)-C(138)  | 111.6(8)  | C(162)-C(138)-N(27)  | 130.1(9)  |
| C(162)-C(138)-C(137) | 105.7(9)  | N(27)-C(138)-C(137)  | 123.6(9)  |
| N(27)-C(139)-C(140)  | 117.5(11) | N(27)-C(139)-C(150)  | 121.5(9)  |
| C(140)-C(139)-C(150) | 121.0(10) | C(141)-C(140)-C(149) | 116.3(11) |
| C(141)-C(140)-C(139) | 124.4(12) | C(149)-C(140)-C(139) | 119.2(12) |
| C(140)-C(141)-C(142) | 125.2(13) | C(143)-C(142)-C(141) | 120.0(13) |
| C(148)-C(143)-C(142) | 114.8(12) | C(148)-C(143)-C(144) | 123.3(12) |
| C(142)-C(143)-C(144) | 121.5(13) | C(143)-C(148)-C(149) | 123.8(13) |
| C(140)-C(149)-C(148) | 119.4(13) | C(139)-C(150)-C(151) | 101.8(9)  |
| N(28)-C(151)-C(152)  | 120.5(9)  | N(28)-C(151)-C(150)  | 123.1(8)  |
| C(152)-C(151)-C(150) | 116.3(10) | C(153)-C(152)-C(161) | 118.1(10) |
| C(153)-C(152)-C(151) | 126.0(10) | C(161)-C(152)-C(151) | 115.7(9)  |
| C(152)-C(153)-C(154) | 120.1(11) | C(155)-C(154)-C(153) | 123.9(11) |
| C(160)-C(155)-C(154) | 114.1(11) | C(160)-C(155)-C(156) | 124.0(12) |
| C(154)-C(155)-C(156) | 121.7(12) | C(155)-C(160)-C(161) | 126.9(11) |
| C(152)-C(161)-C(160) | 116.4(9)  | C(138)-C(162)-N(28)  | 130.0(10) |
| C(138)-C(162)-C(163) | 108.8(9)  | N(28)-C(162)-C(163)  | 121.0(10) |
| N(20)-C(163)-N(19)   | 126.9(9)  | N(20)-C(163)-C(162)  | 125.1(10) |
| N(19)-C(163)-C(162)  | 108.0(10) | N(20)-C(164)-N(21)   | 129.0(8)  |
| N(20)-C(164)-C(165)  | 121.0(7)  | N(21)-C(164)-C(165)  | 109.8(8)  |
| N(29)-C(165)-C(189)  | 131.0(7)  | N(29)-C(165)-C(164)  | 122.9(7)  |
| C(189)-C(165)-C(164) | 105.3(7)  | N(29)-C(166)-C(167)  | 119.0(8)  |
| N(29)-C(166)-C(177)  | 120.5(7)  | C(167)-C(166)-C(177) | 120.5(8)  |
| C(168)-C(167)-C(176) | 118.6(9)  | C(168)-C(167)-C(166) | 118.5(9)  |
| C(176)-C(167)-C(166) | 122.8(10) | C(169)-C(168)-C(167) | 121.1(10) |
| C(168)-C(169)-C(170) | 121.8(11) | C(175)-C(170)-C(169) | 117.5(10) |
| C(175)-C(170)-C(171) | 118.0(12) | C(169)-C(170)-C(171) | 124.5(13) |
| C(170)-C(175)-C(176) | 121.5(11) | C(167)-C(176)-C(175) | 119.4(11) |
| C(178)-C(177)-C(166) | 106.4(9)  | N(30)-C(178)-C(179)  | 117.3(9)  |
| N(30)-C(178)-C(177)  | 119.2(9)  | C(179)-C(178)-C(177) | 123.5(9)  |
| C(180)-C(179)-C(188) | 113.9(10) | C(180)-C(179)-C(178) | 124.7(10) |
| C(188)-C(179)-C(178) | 121.4(10) | C(179)-C(180)-C(181) | 123.2(11) |
| C(182)-C(181)-C(180) | 121.9(12) | C(187)-C(182)-C(181) | 114.4(11) |
| C(187)-C(182)-C(183) | 124.1(13) | C(181)-C(182)-C(183) | 121.4(12) |
| C(182)-C(187)-C(188) | 122.1(12) | C(179)-C(188)-C(187) | 124.4(12) |
| N(30)-C(189)-C(165)  | 129.1(7)  | N(30)-C(189)-C(190)  | 123.7(7)  |
| C(165)-C(189)-C(190) | 106.3(8)  | N(22)-C(190)-N(21)   | 125.6(7)  |
| N(22)-C(190)-C(189)  | 121.0(8)  | N(21)-C(190)-C(189)  | 113.4(7)  |
| N(22)-C(191)-N(23)   | 126.8(8)  | N(22)-C(191)-C(192)  | 120.5(8)  |
| N(23)-C(191)-C(192)  | 112.8(7)  | N(31)-C(192)-C(215)  | 132.0(8)  |
| N(31)-C(192)-C(191)  | 123.9(8)  | C(215)-C(192)-C(191) | 103.4(8)  |
| N(31)-C(193)-C(194)  | 116.9(9)  | N(31)-C(193)-C(204)  | 118.7(8)  |
| C(194)-C(193)-C(204) | 124.3(9)  | C(195)-C(194)-C(203) | 116.3(11) |
| C(195)-C(194)-C(193) | 121.8(10) | C(203)-C(194)-C(193) | 121.9(11) |
| C(196)-C(195)-C(194) | 121.6(12) | C(195)-C(196)-C(197) | 123.0(13) |
| C(202)-C(197)-C(196) | 115.0(11) | C(202)-C(197)-C(198) | 122.3(13) |
| C(196)-C(197)-C(198) | 122.6(13) | C(197)-C(202)-C(203) | 123.5(13) |
| C(194)-C(203)-C(202) | 120.4(12) | C(193)-C(204)-C(205) | 108.0(8)  |
| N(32)-C(205)-C(204)  | 120.8(7)  | N(32)-C(205)-C(206)  | 117.3(8)  |
| C(204)-C(205)-C(206) | 121.8(8)  | C(207)-C(206)-C(214) | 118.0(9)  |
| C(207)-C(206)-C(205) | 123.0(10) | C(214)-C(206)-C(205) | 118.9(9)  |
| C(206)-C(207)-C(208) | 121.3(10) | C(209)-C(208)-C(207) | 121.4(10) |
| C(208)-C(209)-C(22)  | 117.7(9)  | C(208)-C(209)-C(210) | 123.6(12) |
| C(22)-C(209)-C(210)  | 118.8(12) | C(22)-C(214)-C(206)  | 119.1(10) |
| C(192)-C(215)-N(32)  | 128.0(8)  | C(192)-C(215)-C(216) | 109.1(8)  |
| N(32)-C(215)-C(216)  | 122.1(8)  | N(24)-C(216)-N(23)   | 128.2(7)  |
| N(24)-C(216)-C(215)  | 122.9(8)  | N(23)-C(216)-C(215)  | 108.9(7)  |
| C(12)-C(9)-C(11)     | 107.3(12) | C(12)-C(9)-C(10)     | 95.7(15)  |
| C(11)-C(9)-C(10)     | 117.1(18) | C(12)-C(9)-C(8)      | 111.4(12) |
| C(11)-C(9)-C(8)      | 112.2(12) | C(10)-C(9)-C(8)      | 111.8(18) |
| C(12)-C(9)-C(10A)    | 119.9(17) | C(11)-C(9)-C(10A)    | 100.0(16) |
| C(8)-C(9)-C(10A)     | 105.6(17) | C(24)-C(21)-C(23)    | 134.9(17) |
| C(23A)-C(21)-C(25)   | 132.7(18) | C(24)-C(21)-C(25)    | 97.9(12)  |
| C(23)-C(21)-C(25)    | 104.0(14) | C(23A)-C(21)-C(20)   | 115.4(16) |
| C(24)-C(21)-C(20)    | 102.3(11) | C(23)-C(21)-C(20)    | 106.0(15) |
| C(25)-C(21)-C(20)    | 110.5(13) | C(40)-C(37)-C(38)    | 105.0(12) |
| C(40)-C(37)-C(39)    | 112.0(12) | C(38)-C(37)-C(39)    | 106.0(12) |
| C(40)-C(37)-C(36)    | 113.6(11) | C(38)-C(37)-C(36)    | 110.2(12) |
| C(39)-C(37)-C(36)    | 109.7(12) | C(50)-C(49)-C(52)    | 110.1(12) |
| C(50)-C(49)-C(51)    | 111.1(12) | C(52)-C(49)-C(51)    | 106.1(12) |
| C(50)-C(49)-C(48)    | 111.0(11) | C(52)-C(49)-C(48)    | 107.6(11) |
| C(51)-C(49)-C(48)    | 110.8(11) | C(67)-C(64)-C(66)    | 114.5(15) |
| C(67)-C(64)-C(63)    | 108.9(13) | C(66)-C(64)-C(63)    | 109.1(13) |
| C(67)-C(64)-C(65)    | 105.9(13) | C(66)-C(64)-C(65)    | 107.7(13) |
| C(63)-C(64)-C(65)    | 110.7(13) | C(77)-C(76)-C(79)    | 107.2(14) |
| C(77)-C(76)-C(78)    | 103.3(14) | C(79)-C(76)-C(78)    | 112.2(14) |
| C(77)-C(76)-C(75)    | 117.2(14) | C(79)-C(76)-C(75)    | 109.7(13) |
| C(78)-C(76)-C(75)    | 107.1(13) | C(92A)-C(91)-C(93A)  | 107(2)    |
| C(92A)-C(91)-C(90)   | 112.2(19) | C(93A)-C(91)-C(90)   | 108.0(18) |
| C(90)-C(91)-C(94)    | 115.9(17) | C(90)-C(91)-C(93)    | 112.8(17) |
| C(94)-C(91)-C(93)    | 115(2)    | C(90)-C(91)-C(92)    | 106.4(17) |
| C(94)-C(91)-C(92)    | 111(2)    | C(93)-C(91)-C(92)    | 93.0(18)  |
| C(92A)-C(91)-C(94A)  | 111(2)    | C(93A)-C(91)-C(94A)  | 107.7(19) |
| C(90)-C(91)-C(94A)   | 111.1(18) | C(104)-C(103)-C(106) | 103.0(12) |
| C(104)-C(103)-C(105) | 110.4(13) | C(106)-C(103)-C(105) | 108.3(13) |
| C(104)-C(103)-C(102) | 106.6(11) | C(106)-C(103)-C(102) | 110.0(12) |
| C(105)-C(103)-C(102) | 117.6(12) | C(130)-C(129)-C(132) | 111.1(13) |
| C(130)-C(129)-C(131) | 110.7(12) | C(132)-C(129)-C(131) | 101.5(12) |
| C(130)-C(129)-C(128) | 110.2(11) | C(132)-C(129)-C(128) | 109.1(11) |
| C(131)-C(129)-C(128) | 114.0(12) | C(145)-C(144)-C(146) | 110.3(12) |
| C(145)-C(144)-C(147) | 112.9(12) | C(146)-C(144)-C(147) | 107.7(12) |
| C(145)-C(144)-C(143) | 110.8(11) | C(146)-C(144)-C(143) | 106.7(12) |
| C(147)-C(144)-C(143) | 108.2(12) | C(159)-C(156)-C(157) | 111.4(15) |
| C(159)-C(156)-C(158) | 103.8(15) | C(157)-C(156)-C(158) | 117.2(15) |
| C(159)-C(156)-C(155) | 106.7(13) | C(157)-C(156)-C(155) | 105.6(13) |
| C(158)-C(156)-C(155) | 111.9(13) | C(172)-C(171)-C(174) | 117.2(14) |

|                      |           |                      |           |
|----------------------|-----------|----------------------|-----------|
| C(172)-C(171)-C(173) | 100.3(12) | C(174)-C(171)-C(173) | 102.1(12) |
| C(172)-C(171)-C(170) | 109.8(12) | C(174)-C(171)-C(170) | 116.8(12) |
| C(173)-C(171)-C(170) | 108.5(12) | C(182)-C(183)-C(184) | 110.4(12) |
| C(182)-C(183)-C(186) | 110.7(12) | C(184)-C(183)-C(186) | 107.6(12) |
| C(182)-C(183)-C(185) | 113.0(11) | C(184)-C(183)-C(185) | 107.3(12) |
| C(186)-C(183)-C(185) | 107.7(11) | C(201)-C(198)-C(199) | 109.3(12) |
| C(201)-C(198)-C(200) | 105.0(12) | C(199)-C(198)-C(200) | 109.5(12) |
| C(201)-C(198)-C(197) | 112.0(11) | C(199)-C(198)-C(197) | 110.1(11) |
| C(200)-C(198)-C(197) | 110.9(12) | C(03A)-C(210)-C(02A) | 107(2)    |
| C(03A)-C(210)-C(01A) | 111(2)    | C(02A)-C(210)-C(01A) | 112(2)    |
| C(213)-C(210)-C(211) | 119(2)    | C(213)-C(210)-C(212) | 105.4(19) |
| C(211)-C(210)-C(212) | 107(2)    | C(03A)-C(210)-C(209) | 108.1(16) |
| C(02A)-C(210)-C(209) | 113.3(18) | C(01A)-C(210)-C(209) | 105.2(16) |
| C(213)-C(210)-C(209) | 106.0(16) | C(211)-C(210)-C(209) | 110.6(17) |
| C(212)-C(210)-C(209) | 108.3(16) |                      |           |



## UV-vis and TD-DFT study

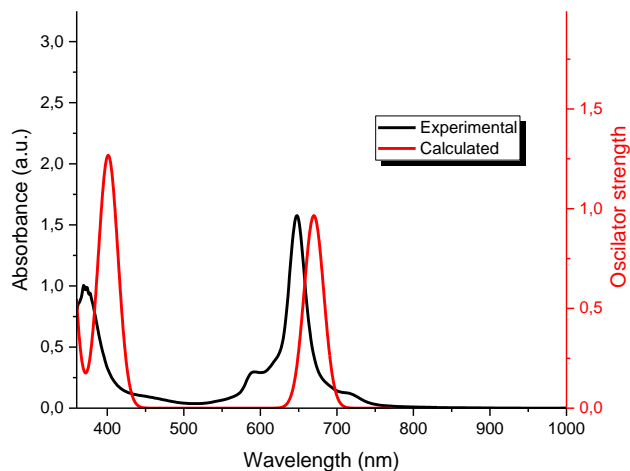

**Fig. S14** Calculated (TD-DFT) and experimental (pyridine solution) spectra of the  $t\text{Bu}_8\text{Dz}_4\text{PzMg}$  monomer.

## DFT calculation details

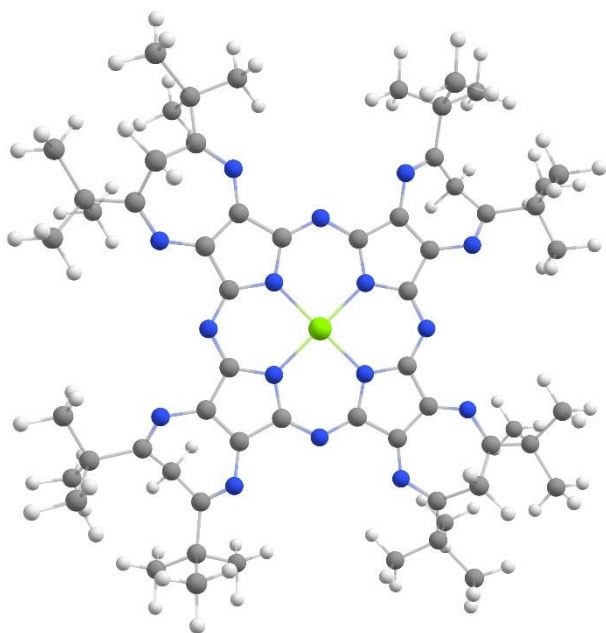

**Table S4** Optimized geometry of  $t\text{Bu}_8\text{Dz}_4\text{PzMg}$  (monomer)

### ----- CARTESIAN COORDINATES (ANGSTROEM)

|   |                 |                 |                 |   |                 |                 |                 |
|---|-----------------|-----------------|-----------------|---|-----------------|-----------------|-----------------|
| C | 2.448165000000  | -3.507067000000 | -0.049951000000 | C | 3.506486000000  | 2.447956000000  | 0.059678000000  |
| C | 3.458646000000  | -2.514518000000 | -0.040182000000 | C | 2.514146000000  | 3.458645000000  | 0.047744000000  |
| C | 2.769682000000  | -1.211655000000 | 0.002142000000  | C | 1.211112000000  | 2.769791000000  | 0.007612000000  |
| C | 1.157999000000  | -2.794544000000 | -0.009879000000 | C | 2.793727000000  | 1.157889000000  | 0.021984000000  |
| C | -3.507089000000 | -2.448811000000 | 0.058723000000  | C | 3.654585000000  | -5.476531000000 | -0.355536000000 |
| C | -2.514749000000 | -3.459529000000 | 0.048817000000  | C | 4.665413000000  | -4.743703000000 | -1.239848000000 |
| C | -1.211635000000 | -2.770700000000 | 0.009777000000  | C | 5.410908000000  | -3.744222000000 | -0.363213000000 |
| C | -2.794246000000 | -1.158818000000 | 0.021003000000  | H | 5.342712000000  | -5.435342000000 | -1.767420000000 |
| C | -2.448454000000 | 3.506124000000  | -0.053504000000 | H | 4.080957000000  | -4.159879000000 | -1.991566000000 |
| C | -3.459033000000 | 2.513631000000  | -0.042576000000 | N | -1.436225000000 | -1.408650000000 | 0.023573000000  |
| C | -2.770141000000 | 1.210679000000  | -0.000184000000 | N | -0.033068000000 | -3.400576000000 | -0.003629000000 |
| C | -1.158354000000 | 2.793550000000  | -0.013459000000 | N | -1.408114000000 | 1.435461000000  | -0.013099000000 |





|    |       |       |          |          |            |            |                   |                   |                   |
|----|-------|-------|----------|----------|------------|------------|-------------------|-------------------|-------------------|
| 61 | 5.330 | 232.6 | 0.003655 | 0.004483 | 0.049957   | 0.055341   | 0.26 ( 121-> 141) | 0.26 ( 120-> 140) | 0.15 ( 120-> 141) |
| 62 | 5.425 | 228.5 | 0.000001 | 0.000001 | 0.011028   | 0.009808   | 0.36 ( 120-> 140) | 0.36 ( 121-> 141) | 0.04 ( 129-> 146) |
| 63 | 5.529 | 224.2 | 0.000212 | 0.000029 | 0.012989   | 0.004981   | 0.57 ( 139-> 151) | 0.24 ( 130-> 142) | 0.01 ( 128-> 143) |
| 64 | 5.550 | 223.4 | 0.000000 | 0.000000 | 0.032402   | 0.030867   | 0.94 ( 139-> 152) | 0.01 ( 138-> 145) | 0.01 ( 139-> 147) |
| 65 | 5.581 | 222.2 | 0.001909 | 0.001696 | -0.020781  | -0.019606  | 0.51 ( 130-> 142) | 0.20 ( 139-> 151) | 0.04 ( 120-> 141) |
| 66 | 5.598 | 221.5 | 0.000055 | 0.000026 | -0.006897  | -0.004720  | 0.15 ( 121-> 140) | 0.15 ( 120-> 141) | 0.13 ( 121-> 141) |
| 67 | 5.620 | 220.6 | 0.000114 | 0.000063 | 0.005842   | 0.004581   | 0.44 ( 133-> 142) | 0.09 ( 137-> 145) | 0.05 ( 120-> 141) |
| 68 | 5.643 | 219.7 | 0.006364 | 0.006647 | 0.566084   | 0.640094   | 0.41 ( 118-> 141) | 0.14 ( 117-> 141) | 0.06 ( 132-> 146) |
| 69 | 5.643 | 219.7 | 0.006643 | 0.006896 | -0.751632  | -0.817748  | 0.41 ( 118-> 140) | 0.14 ( 117-> 140) | 0.06 ( 131-> 146) |
| 70 | 5.673 | 218.6 | 0.160765 | 0.140047 | -31.646250 | -29.820946 | 0.51 ( 132-> 142) | 0.08 ( 137-> 143) | 0.05 ( 129-> 143) |
| 71 | 5.673 | 218.5 | 0.160966 | 0.140150 | 32.019436  | 30.174868  | 0.51 ( 131-> 142) | 0.08 ( 137-> 144) | 0.05 ( 129-> 144) |
| 72 | 5.717 | 216.9 | 0.000005 | 0.000005 | -0.010908  | -0.009394  | 0.38 ( 129-> 142) | 0.11 ( 138-> 145) | 0.07 ( 133-> 145) |
| 73 | 5.776 | 214.6 | 0.000385 | 0.000109 | 0.017963   | -0.010542  | 0.12 ( 133-> 146) | 0.11 ( 115-> 141) | 0.11 ( 116-> 140) |
| 74 | 5.819 | 213.1 | 0.000078 | 0.000068 | -0.001685  | -0.001546  | 0.11 ( 119-> 142) | 0.11 ( 109-> 141) | 0.11 ( 108-> 140) |
| 75 | 5.848 | 212.0 | 0.000016 | 0.000014 | -0.005862  | -0.004945  | 0.22 ( 116-> 140) | 0.21 ( 115-> 141) | 0.12 ( 126-> 142) |
| 76 | 5.857 | 211.7 | 0.255428 | 0.212252 | 8.475877   | 7.707928   | 0.26 ( 138-> 143) | 0.18 ( 138-> 144) | 0.11 ( 137-> 143) |
| 77 | 5.857 | 211.7 | 0.255393 | 0.212118 | -7.754232  | -7.042711  | 0.26 ( 138-> 144) | 0.18 ( 138-> 143) | 0.12 ( 137-> 144) |
| 78 | 5.915 | 209.6 | 0.000439 | 0.000558 | 0.015297   | 0.017200   | 0.42 ( 138-> 146) | 0.23 ( 137-> 147) | 0.10 ( 134-> 146) |
| 79 | 5.943 | 208.6 | 0.022877 | 0.017801 | 8.852098   | 7.881797   | 0.36 ( 128-> 142) | 0.10 ( 118-> 141) | 0.07 ( 130-> 143) |
| 80 | 5.943 | 208.6 | 0.023490 | 0.018291 | -8.819640  | -7.854027  | 0.36 ( 127-> 142) | 0.10 ( 118-> 140) | 0.07 ( 130-> 144) |
| 81 | 5.994 | 206.8 | 0.000000 | 0.000000 | -0.074012  | -0.078044  | 0.35 ( 138-> 145) | 0.28 ( 134-> 145) | 0.08 ( 135-> 144) |

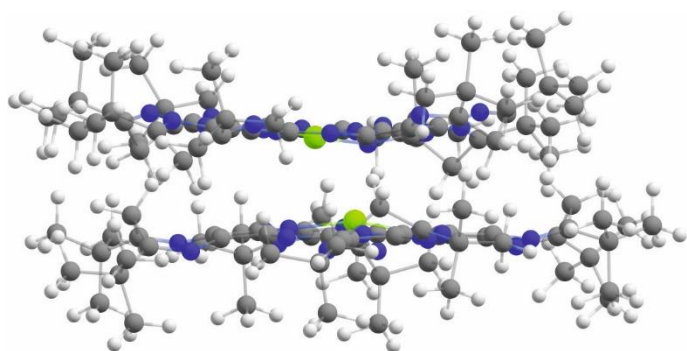

**Table S6** Optimized geometry of  $[t\text{Bu}_8\text{Dz}_4\text{PzMg}]_2$  (dimer)

-----  
 CARTESIAN COORDINATES (ANGSTROM)

|   |                 |                 |                 |    |                 |                 |                 |
|---|-----------------|-----------------|-----------------|----|-----------------|-----------------|-----------------|
| C | -3.751206000000 | -0.314037000000 | -1.395852000000 | H  | -7.439276000000 | 0.425110000000  | -0.342371000000 |
| C | -3.773017000000 | 1.096396000000  | -1.520823000000 | H  | -5.738175000000 | 0.539375000000  | 0.229447000000  |
| C | -2.362844000000 | 1.541944000000  | -1.493376000000 | H  | 0.551421000000  | -7.448850000000 | -0.393847000000 |
| C | -2.338361000000 | -0.702302000000 | -1.308903000000 | H  | 0.661729000000  | -5.747538000000 | 0.178463000000  |
| C | 1.146290000000  | -3.775541000000 | -1.582703000000 | N  | 0.461587000000  | -1.561334000000 | -1.357159000000 |
| C | -0.260544000000 | -3.769949000000 | -1.424802000000 | N  | -1.936791000000 | -1.973341000000 | -1.276570000000 |
| C | -0.662358000000 | -2.360817000000 | -1.331121000000 | N  | 2.448511000000  | 0.436204000000  | -1.741659000000 |
| C | 1.575828000000  | -2.360840000000 | -1.564702000000 | N  | 2.835467000000  | -1.965910000000 | -1.750377000000 |
| C | 4.642402000000  | 1.143702000000  | -1.962468000000 | N  | 0.422895000000  | 2.442492000000  | -1.701324000000 |
| C | 4.634935000000  | -0.274732000000 | -1.995273000000 | N  | -1.980658000000 | 2.809788000000  | -1.647651000000 |
| C | 3.232538000000  | -0.690167000000 | -1.824965000000 | N  | 2.820093000000  | 2.836360000000  | -1.872550000000 |
| C | 3.232041000000  | 1.562956000000  | -1.857189000000 | N  | -1.154088000000 | 5.654926000000  | -2.160663000000 |
| C | -0.305287000000 | 4.632158000000  | -1.870275000000 | N  | 1.954548000000  | 5.684361000000  | -2.126751000000 |
| C | 1.113575000000  | 4.642739000000  | -1.894991000000 | N  | -4.758483000000 | -1.211709000000 | -1.536253000000 |
| C | 1.542494000000  | 3.233860000000  | -1.828012000000 | N  | -4.833505000000 | 1.857983000000  | -1.899331000000 |
| C | -0.709630000000 | 3.222416000000  | -1.732300000000 | N  | 1.913988000000  | -4.824508000000 | -1.980316000000 |
| C | -0.846889000000 | 6.896924000000  | -1.934887000000 | N  | -1.148510000000 | -4.788574000000 | -1.542903000000 |
| C | 0.364254000000  | 7.218487000000  | -1.059696000000 | N  | -1.550991000000 | 0.430808000000  | -1.308762000000 |
| C | 1.630059000000  | 6.915469000000  | -1.852347000000 | C  | 6.916180000000  | 1.660797000000  | -1.940912000000 |
| C | -6.006058000000 | -0.928307000000 | -1.305350000000 | C  | 7.232779000000  | 0.357375000000  | -1.208512000000 |
| C | -6.386843000000 | 0.400927000000  | -0.666564000000 | C  | 6.895949000000  | -0.807313000000 | -2.132780000000 |
| C | -6.065880000000 | 1.498732000000  | -1.677350000000 | H  | 8.270555000000  | 0.323848000000  | -0.837161000000 |
| C | 1.581715000000  | -6.061803000000 | -1.747575000000 | H  | 6.531906000000  | 0.285725000000  | -0.342883000000 |
| C | 0.508597000000  | -6.396428000000 | -0.714714000000 | N  | 5.680373000000  | 1.994650000000  | -2.178352000000 |
| C | -0.841347000000 | -6.031549000000 | -1.317893000000 | N  | 5.650002000000  | -1.107355000000 | -2.347179000000 |
| H | 0.342818000000  | 8.249384000000  | -0.668240000000 | Mg | 0.497174000000  | 0.484156000000  | -1.238559000000 |
| H | 0.328488000000  | 6.503940000000  | -0.203410000000 | C  | -2.913449000000 | -3.879893000000 | 2.199824000000  |











|     |       |       |          |          |             |             |                   |                   |                   |
|-----|-------|-------|----------|----------|-------------|-------------|-------------------|-------------------|-------------------|
| 129 | 4.591 | 270.0 | 0.044059 | 0.044167 | -26.486414  | -26.016596  | 0.11 ( 255-> 283) | 0.09 ( 278-> 290) | 0.09 ( 251-> 282) |
| 130 | 4.592 | 270.0 | 0.009643 | 0.009627 | 2.711164    | 2.416251    | 0.10 ( 255-> 282) | 0.09 ( 251-> 283) | 0.08 ( 246-> 280) |
| 131 | 4.599 | 269.6 | 0.130425 | 0.123315 | -63.830520  | -61.935696  | 0.16 ( 275-> 284) | 0.07 ( 251-> 283) | 0.06 ( 258-> 283) |
| 132 | 4.603 | 269.3 | 0.026382 | 0.024576 | 23.519322   | 22.822124   | 0.33 ( 250-> 281) | 0.08 ( 278-> 293) | 0.04 ( 256-> 283) |
| 133 | 4.610 | 269.0 | 0.008054 | 0.007278 | 22.681760   | 21.571282   | 0.23 ( 279-> 295) | 0.12 ( 275-> 284) | 0.09 ( 278-> 294) |
| 134 | 4.634 | 267.6 | 0.022647 | 0.019612 | -44.346324  | -39.980124  | 0.08 ( 275-> 284) | 0.07 ( 276-> 284) | 0.06 ( 256-> 282) |
| 135 | 4.637 | 267.4 | 0.006630 | 0.005578 | 21.052092   | 18.127428   | 0.12 ( 251-> 282) | 0.11 ( 252-> 282) | 0.05 ( 251-> 283) |
| 136 | 4.653 | 266.4 | 0.115474 | 0.113695 | -10.661987  | -10.514993  | 0.15 ( 256-> 282) | 0.09 ( 279-> 297) | 0.06 ( 246-> 280) |
| 137 | 4.663 | 265.9 | 0.077154 | 0.075502 | -5.205533   | -6.473610   | 0.18 ( 274-> 285) | 0.08 ( 252-> 283) | 0.04 ( 256-> 283) |
| 138 | 4.668 | 265.6 | 0.038371 | 0.038201 | 32.362561   | 33.303752   | 0.13 ( 256-> 282) | 0.09 ( 279-> 297) | 0.08 ( 252-> 283) |
| 139 | 4.677 | 265.1 | 0.012376 | 0.011778 | 17.637510   | 17.148499   | 0.21 ( 256-> 283) | 0.12 ( 252-> 282) | 0.04 ( 256-> 282) |
| 140 | 4.679 | 265.0 | 0.045625 | 0.045381 | -46.435920  | -45.325199  | 0.08 ( 279-> 297) | 0.05 ( 273-> 285) | 0.04 ( 254-> 281) |
| 141 | 4.685 | 264.6 | 0.024780 | 0.024854 | 45.308309   | 45.609966   | 0.28 ( 275-> 285) | 0.06 ( 274-> 285) | 0.05 ( 252-> 282) |
| 142 | 4.693 | 264.2 | 0.017213 | 0.017866 | -10.260246  | -12.023418  | 0.12 ( 275-> 285) | 0.12 ( 256-> 282) | 0.06 ( 273-> 285) |
| 143 | 4.705 | 263.5 | 0.100708 | 0.095277 | -120.325784 | -117.592129 | 0.05 ( 254-> 281) | 0.04 ( 274-> 285) | 0.04 ( 277-> 284) |
| 144 | 4.709 | 263.3 | 0.008899 | 0.007968 | 11.215361   | 9.438536    | 0.25 ( 255-> 281) | 0.19 ( 253-> 281) | 0.07 ( 275-> 285) |
| 145 | 4.716 | 262.9 | 0.016098 | 0.016074 | 38.651992   | 36.675279   | 0.06 ( 255-> 281) | 0.05 ( 248-> 280) | 0.05 ( 254-> 282) |
| 146 | 4.724 | 262.5 | 0.103335 | 0.101019 | -113.847334 | -111.863093 | 0.05 ( 279-> 296) | 0.05 ( 256-> 282) | 0.05 ( 248-> 280) |
| 147 | 4.729 | 262.2 | 0.072341 | 0.069399 | 84.921824   | 83.019154   | 0.16 ( 248-> 280) | 0.06 ( 252-> 280) | 0.05 ( 251-> 280) |
| 148 | 4.731 | 262.1 | 0.029230 | 0.028101 | -4.853052   | -4.820752   | 0.09 ( 250-> 280) | 0.07 ( 254-> 283) | 0.05 ( 248-> 283) |
| 149 | 4.738 | 261.7 | 0.059906 | 0.056392 | 17.764536   | 16.757783   | 0.10 ( 276-> 285) | 0.07 ( 248-> 282) | 0.06 ( 254-> 282) |
| 150 | 4.750 | 261.0 | 0.006791 | 0.007081 | -8.603220   | -8.521310   | 0.33 ( 279-> 296) | 0.07 ( 279-> 297) | 0.06 ( 276-> 285) |

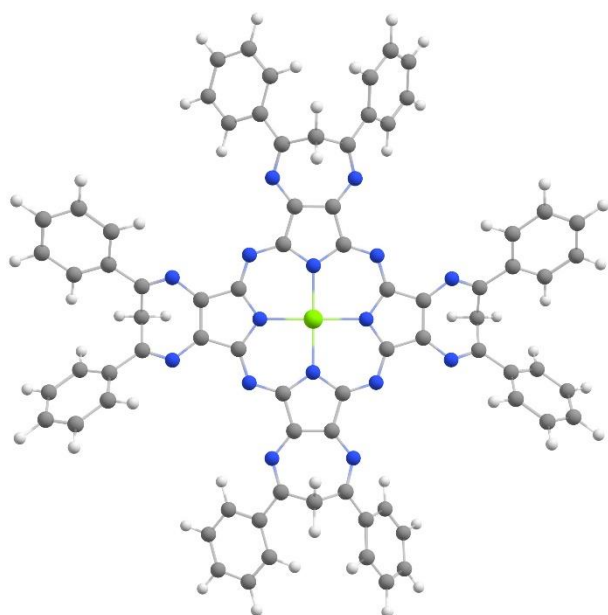

**Table S8** Optimized geometry of Ph<sub>8</sub>Dz<sub>4</sub>PzMg (monomer)

-----  
**CARTESIAN COORDINATES (ANGSTROM)**

|   |                 |                  |                |   |                 |                  |                 |
|---|-----------------|------------------|----------------|---|-----------------|------------------|-----------------|
| C | 19.110497000000 | -18.074711000000 | 1.281694000000 | C | 23.983388000000 | -14.495478000000 | 1.029912000000  |
| C | 20.526019000000 | -18.052955000000 | 1.109632000000 | C | 23.964534000000 | -13.070071000000 | 1.059162000000  |
| C | 20.931932000000 | -16.637089000000 | 1.183992000000 | C | 22.545574000000 | -12.674327000000 | 1.136622000000  |
| C | 22.897598000000 | -21.319637000000 | 1.892128000000 | C | 18.235648000000 | -22.829147000000 | 1.104744000000  |
| C | 18.688092000000 | -16.672620000000 | 1.455107000000 | C | 22.576677000000 | -14.934585000000 | 1.091709000000  |
| C | 15.593497000000 | -13.212138000000 | 2.071065000000 | C | 18.609944000000 | -20.321605000000 | 0.964047000000  |
| C | 15.616437000000 | -14.637762000000 | 2.043278000000 | C | 19.691910000000 | -20.427337000000 | -0.102629000000 |
| C | 17.010096000000 | -15.028686000000 | 1.761934000000 | C | 21.014118000000 | -20.277887000000 | 0.633935000000  |
| C | 16.791035000000 | -21.314299000000 | 2.349438000000 | C | 21.887846000000 | -21.440244000000 | 0.904325000000  |
| C | 16.974615000000 | -12.768974000000 | 1.804486000000 | C | 17.883898000000 | -21.507134000000 | 1.464847000000  |
| C | 16.071433000000 | -22.407019000000 | 2.842684000000 | C | 21.779224000000 | -22.662616000000 | 0.199598000000  |
| C | 20.401977000000 | -9.620987000000  | 1.273938000000 | C | 22.641625000000 | -23.733172000000 | 0.481015000000  |
| C | 18.986374000000 | -9.647502000000  | 1.442381000000 | C | 23.627598000000 | -23.603406000000 | 1.473193000000  |
| C | 18.605017000000 | -11.066997000000 | 1.562885000000 | C | 23.754537000000 | -22.388765000000 | 2.174156000000  |
| C | 16.433151000000 | -23.718924000000 | 2.478382000000 | H | 22.985691000000 | -20.359009000000 | 2.422723000000  |
| C | 20.849609000000 | -11.026542000000 | 1.294864000000 | H | 16.528463000000 | -20.280786000000 | 2.623654000000  |
| C | 17.520081000000 | -23.924078000000 | 1.612908000000 | H | 15.219312000000 | -22.238005000000 | 3.522030000000  |







|     |       |       |          |          |             |            |                   |                   |                   |
|-----|-------|-------|----------|----------|-------------|------------|-------------------|-------------------|-------------------|
| 141 | 5.516 | 224.8 | 0.033965 | 0.026838 | -31.954247  | -27.491516 | 0.18 ( 142-> 152) | 0.13 ( 141-> 154) | 0.12 ( 140-> 153) |
| 142 | 5.541 | 223.8 | 0.008086 | 0.006613 | 0.998432    | 1.186443   | 0.34 ( 138-> 147) | 0.06 ( 135-> 148) | 0.05 ( 134-> 151) |
| 143 | 5.548 | 223.5 | 0.099472 | 0.086263 | 19.508759   | 16.974166  | 0.11 ( 141-> 152) | 0.08 ( 139-> 150) | 0.07 ( 142-> 154) |
| 144 | 5.550 | 223.4 | 0.094773 | 0.082012 | -11.619420  | -10.471310 | 0.11 ( 140-> 152) | 0.09 ( 142-> 153) | 0.08 ( 137-> 147) |
| 145 | 5.561 | 222.9 | 0.000828 | 0.000572 | -2.454706   | -2.111454  | 0.35 ( 134-> 148) | 0.09 ( 120-> 150) | 0.08 ( 121-> 149) |
| 146 | 5.583 | 222.1 | 0.000104 | 0.000056 | -0.440143   | -0.221209  | 0.29 ( 109-> 146) | 0.28 ( 108-> 145) | 0.04 ( 144-> 166) |
| 147 | 5.604 | 221.2 | 0.167128 | 0.132079 | 118.704964  | 98.207011  | 0.19 ( 134-> 150) | 0.18 ( 137-> 147) | 0.07 ( 120-> 151) |
| 148 | 5.607 | 221.1 | 0.167363 | 0.133097 | -117.111025 | -99.835995 | 0.17 ( 136-> 147) | 0.14 ( 134-> 149) | 0.07 ( 121-> 151) |
| 149 | 5.630 | 220.2 | 0.028809 | 0.022453 | -3.294734   | -1.043481  | 0.19 ( 126-> 147) | 0.07 ( 131-> 148) | 0.06 ( 133-> 149) |
| 150 | 5.646 | 219.6 | 0.000719 | 0.000562 | 1.129243    | 0.827798   | 0.31 ( 134-> 151) | 0.08 ( 138-> 147) | 0.06 ( 120-> 150) |

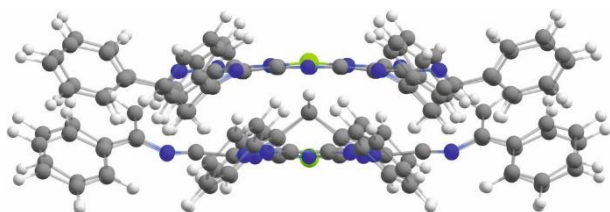

**Table S10** Optimized geometry of  $[\text{Ph}_3\text{Dz}_4\text{PzMg}]_2$  (dimer)

-----  
**CARTESIAN COORDINATES (ANGSTROM)**

|   |                 |                 |                 |   |                  |                  |                 |
|---|-----------------|-----------------|-----------------|---|------------------|------------------|-----------------|
| C | -4.202419000000 | -0.756440000000 | -1.478703000000 | C | 1.945278000000   | 7.618704000000   | -1.202346000000 |
| C | -4.217085000000 | 0.667515000000  | -1.463943000000 | C | -2.053828000000  | 7.597130000000   | -1.357704000000 |
| C | -2.817035000000 | 1.098260000000  | -1.603052000000 | C | -7.622558000000  | 1.941465000000   | -1.206825000000 |
| C | -7.567386000000 | 2.888557000000  | -2.260569000000 | C | -7.599893000000  | -2.055815000000  | -1.354495000000 |
| C | -2.793774000000 | -1.158386000000 | -1.610314000000 | C | 1.824018000000   | 8.821680000000   | -0.469923000000 |
| C | 0.753438000000  | -4.204296000000 | -1.478755000000 | C | 2.617092000000   | 9.934182000000   | -0.783549000000 |
| C | -0.670447000000 | -4.219059000000 | -1.462672000000 | C | 3.544267000000   | 9.869060000000   | -1.836113000000 |
| C | -1.101415000000 | -2.819133000000 | -1.602579000000 | C | 3.684576000000   | 8.673843000000   | -2.566339000000 |
| C | -7.469971000000 | -3.066398000000 | -2.341756000000 | C | 2.896031000000   | 7.562038000000   | -2.252702000000 |
| C | 1.155131000000  | -2.795663000000 | -1.610894000000 | C | -3.063719000000  | 7.466581000000   | -2.345585000000 |
| C | -8.571008000000 | -3.835939000000 | -2.728726000000 | C | -3.832780000000  | 8.567453000000   | -2.733991000000 |
| C | 4.201352000000  | 0.751260000000  | -1.475196000000 | C | -3.610925000000  | 9.828193000000   | -2.147284000000 |
| C | 4.215620000000  | -0.672631000000 | -1.462662000000 | C | -2.617818000000  | 9.970132000000   | -1.165332000000 |
| C | 2.815638000000  | -1.103059000000 | -1.602453000000 | C | -1.846289000000  | 8.866888000000   | -0.773323000000 |
| C | -9.831307000000 | -3.613902000000 | -2.141131000000 | C | -8.825195000000  | 1.821237000000   | -0.473701000000 |
| C | 2.792776000000  | 1.153536000000  | -1.607418000000 | C | -9.938783000000  | 2.611780000000   | -0.789854000000 |
| C | -9.972620000000 | -2.620095000000 | -1.159800000000 | C | -9.875133000000  | 3.535296000000   | -1.845711000000 |
| C | -0.754497000000 | 4.199459000000  | -1.478544000000 | C | -8.680283000000  | 3.674535000000   | -2.576751000000 |
| C | 0.669331000000  | 4.214079000000  | -1.462088000000 | H | -6.623129000000  | 2.980494000000   | -2.819080000000 |
| C | 1.100289000000  | 2.814022000000  | -1.600507000000 | H | -6.475583000000  | -3.221940000000  | -2.787678000000 |
| C | -8.869208000000 | -1.848049000000 | -0.769259000000 | H | -8.450236000000  | -4.615851000000  | -3.499251000000 |
| C | -1.156344000000 | 2.790721000000  | -1.609955000000 | H | -10.701317000000 | -4.218958000000  | -2.446318000000 |
| C | -1.825647000000 | -8.824550000000 | -0.461993000000 | H | -10.951582000000 | -2.446503000000  | -0.684243000000 |
| C | -2.618321000000 | -9.937861000000 | -0.773752000000 | H | -9.002634000000  | -1.088442000000  | 0.012538000000  |
| C | -3.543359000000 | -9.875844000000 | -1.828383000000 | H | -1.135356000000  | -8.888114000000  | 0.391364000000  |
| C | -3.681934000000 | -8.682911000000 | -2.562652000000 | H | -4.162462000000  | -10.754740000000 | -2.074058000000 |
| C | -2.893898000000 | -7.570230000000 | -2.250780000000 | H | -4.408614000000  | -8.625304000000  | -3.390408000000 |
| C | -1.269111000000 | 6.403850000000  | -0.979579000000 | H | -2.985355000000  | -6.627399000000  | -2.811768000000 |
| C | -0.093416000000 | 6.466949000000  | -0.018834000000 | H | 3.214016000000   | -6.479605000000  | -2.793069000000 |
| C | 1.138588000000  | 6.417423000000  | -0.905046000000 | H | 4.602963000000   | -8.456098000000  | -3.509229000000 |
| C | 3.058604000000  | -7.473802000000 | -2.346660000000 | H | 4.206260000000   | -10.706737000000 | -2.455286000000 |
| C | 3.825397000000  | -8.575845000000 | -2.736179000000 | H | 2.439164000000   | -10.954708000000 | -0.687532000000 |
| C | -6.406449000000 | -1.270592000000 | -0.977988000000 | H | 1.085998000000   | -9.003927000000  | 0.013775000000  |
| C | -6.469003000000 | -0.093555000000 | -0.018871000000 | H | -0.126234000000  | 7.355699000000   | 0.633596000000  |
| C | -6.420425000000 | 1.136811000000  | -0.907422000000 | H | -0.108311000000  | 5.556553000000   | 0.627324000000  |
| C | 3.603462000000  | -9.835896000000 | -2.148006000000 | H | -7.357249000000  | -0.125400000000  | 0.634313000000  |
| C | 2.612606000000  | -9.975923000000 | -1.163516000000 | H | -5.558066000000  | -0.107366000000  | 0.626534000000  |
| C | 1.267961000000  | -6.408152000000 | -0.977755000000 | H | 0.125607000000   | -7.357518000000  | 0.637313000000  |
| C | 0.092718000000  | -6.469717000000 | -0.016411000000 | H | 0.107858000000   | -5.558327000000  | 0.628302000000  |
| C | -1.139191000000 | -6.421693000000 | -0.902827000000 | H | -2.519220000000  | -10.858968000000 | -0.177144000000 |
| C | 1.843311000000  | -8.871489000000 | -0.770422000000 | H | 1.131965000000   | 8.887717000000   | 0.381801000000  |
| C | 2.050938000000  | -7.602432000000 | -1.356254000000 | H | 2.516562000000   | 10.857134000000  | -0.190039000000 |
| C | -1.945356000000 | -7.623784000000 | -1.198286000000 | H | 4.163762000000   | 10.747272000000  | -2.083234000000 |



|   |                  |                 |                 |    |                 |                 |                 |
|---|------------------|-----------------|-----------------|----|-----------------|-----------------|-----------------|
| H | -5.184646000000  | 5.169122000000  | -0.633603000000 | N  | 2.638112000000  | -4.813435000000 | 1.523002000000  |
| H | -3.889959000000  | -3.926195000000 | -0.591774000000 | N  | -1.414416000000 | -1.425381000000 | 1.719586000000  |
| H | -5.169614000000  | -5.189828000000 | -0.627771000000 | C  | 3.256773000000  | 7.412442000000  | 2.365284000000  |
| H | 3.923646000000   | -3.888413000000 | -0.594362000000 | C  | 7.448101000000  | 3.153066000000  | 2.236123000000  |
| H | 5.188388000000   | -5.166668000000 | -0.634105000000 | C  | 8.797282000000  | 3.357525000000  | 2.541628000000  |
| H | 5.878219000000   | -9.480872000000 | 0.301681000000  | C  | 9.533001000000  | 4.350999000000  | 1.867783000000  |
| H | -5.524488000000  | 7.091004000000  | -0.226933000000 | C  | 8.906197000000  | 5.128063000000  | 0.880630000000  |
| H | -5.878110000000  | 9.481066000000  | 0.311872000000  | C  | 7.553615000000  | 4.924671000000  | 0.573554000000  |
| H | -4.485679000000  | 10.605577000000 | 2.074209000000  | C  | 5.376591000000  | 3.675181000000  | 0.951566000000  |
| H | -2.716025000000  | 9.290869000000  | 3.286901000000  | C  | 4.551796000000  | 4.566699000000  | 0.039586000000  |
| H | -2.370300000000  | 6.856198000000  | 2.734798000000  | C  | 3.677379000000  | 5.385434000000  | 0.974811000000  |
| H | -6.817593000000  | 2.488743000000  | 2.875220000000  | C  | 3.982553000000  | 6.789796000000  | 1.317843000000  |
| H | -9.202368000000  | 2.952465000000  | 3.544670000000  | C  | 6.799809000000  | 3.937423000000  | 1.248096000000  |
| H | -10.516314000000 | 4.723285000000  | 2.332366000000  | C  | 4.969405000000  | 7.544726000000  | 0.644224000000  |
| H | -9.444372000000  | 5.991920000000  | 0.448091000000  | C  | 5.230477000000  | 8.872400000000  | 1.010990000000  |
| H | -7.104262000000  | 5.520770000000  | -0.207579000000 | C  | 4.513175000000  | 9.472484000000  | 2.058053000000  |
| H | -7.092180000000  | -5.525959000000 | -0.222235000000 | C  | 3.518967000000  | 8.736482000000  | 2.730602000000  |
| H | -9.481951000000  | -5.878867000000 | 0.318711000000  | H  | 2.485149000000  | 6.817605000000  | 2.877910000000  |
| H | -10.604703000000 | -4.485236000000 | 2.081236000000  | H  | 6.853674000000  | 2.381378000000  | 2.748965000000  |
| H | -9.288759000000  | -2.714940000000 | 3.291588000000  | H  | 9.282956000000  | 2.740485000000  | 3.316221000000  |
| N | 1.426293000000   | -1.415986000000 | 1.721621000000  | H  | 10.596805000000 | 4.514004000000  | 2.108240000000  |
| N | 0.010230000000   | -3.397234000000 | 1.659765000000  | H  | 9.477565000000  | 5.895363000000  | 0.333816000000  |
| N | 1.417280000000   | 1.424875000000  | 1.722186000000  | H  | 7.092899000000  | 5.528435000000  | -0.219980000000 |
| N | 3.398236000000   | 0.008783000000  | 1.661439000000  | H  | 5.170929000000  | 5.188517000000  | -0.628578000000 |
| N | -1.424034000000  | 1.415344000000  | 1.720946000000  | H  | 3.892479000000  | 3.923481000000  | -0.590847000000 |
| N | -3.395728000000  | -0.009229000000 | 1.658971000000  | H  | 5.526053000000  | 7.106881000000  | -0.195682000000 |
| N | -0.007701000000  | 3.396408000000  | 1.660727000000  | H  | 5.997176000000  | 9.445632000000  | 0.465053000000  |
| N | -4.826547000000  | 2.631463000000  | 1.538215000000  | H  | 4.723715000000  | 10.515675000000 | 2.347141000000  |
| N | -2.635068000000  | 4.812962000000  | 1.523729000000  | H  | 2.948300000000  | 9.201186000000  | 3.552168000000  |
| N | -2.631171000000  | -4.827970000000 | 1.542422000000  | N  | 4.814765000000  | 2.637325000000  | 1.527072000000  |
| N | -4.812105000000  | -2.636170000000 | 1.524580000000  | N  | 2.632390000000  | 4.827542000000  | 1.541568000000  |
| N | 4.829038000000   | -2.631050000000 | 1.539746000000  | Mg | 0.001283000000  | -0.000159000000 | 1.830595000000  |

**Table S11** TD-DFT calculated UV-Vis spectrum of  $[\text{Ph}_8\text{Dz}_4\text{PzMg}]_2$  (dimer)

| state | eV    | nm     | fL       | fV       | RL          | RV          |                   |                   |                   |
|-------|-------|--------|----------|----------|-------------|-------------|-------------------|-------------------|-------------------|
| 0     | 0.898 | 1380.4 | 0.000027 | 0.000100 | 13.371408   | 25.659816   | 0.98 ( 295-> 296) | 0.01 ( 295-> 297) | 0.00 ( 295-> 303) |
| 1     | 0.899 | 1379.5 | 0.000029 | 0.000106 | 13.628078   | 26.262695   | 0.98 ( 295-> 297) | 0.01 ( 295-> 296) | 0.00 ( 295-> 304) |
| 2     | 1.416 | 875.8  | 0.082727 | 0.207677 | 3.808623    | 6.035187    | 0.81 ( 295-> 298) | 0.15 ( 294-> 296) | 0.01 ( 294-> 297) |
| 3     | 1.416 | 875.3  | 0.082952 | 0.207990 | 3.702491    | 5.863068    | 0.81 ( 295-> 299) | 0.15 ( 294-> 297) | 0.01 ( 294-> 296) |
| 4     | 1.873 | 661.9  | 0.725729 | 1.285824 | -59.413696  | -79.093571  | 0.77 ( 294-> 296) | 0.12 ( 295-> 298) | 0.02 ( 293-> 297) |
| 5     | 1.874 | 661.6  | 0.724916 | 1.283711 | -59.205985  | -78.792657  | 0.77 ( 294-> 297) | 0.12 ( 295-> 299) | 0.02 ( 293-> 296) |
| 6     | 2.230 | 556.1  | 0.000019 | 0.000015 | -11.940300  | -10.406172  | 0.47 ( 292-> 296) | 0.44 ( 291-> 297) | 0.01 ( 291-> 296) |
| 7     | 2.258 | 549.2  | 0.000013 | 0.000015 | 0.060197    | 0.066705    | 0.34 ( 292-> 297) | 0.34 ( 291-> 296) | 0.11 ( 291-> 297) |
| 8     | 2.259 | 548.8  | 0.001621 | 0.001955 | 10.076663   | 10.691140   | 0.51 ( 294-> 298) | 0.35 ( 290-> 297) | 0.05 ( 290-> 296) |
| 9     | 2.260 | 548.6  | 0.001469 | 0.001781 | 9.842043    | 10.514139   | 0.51 ( 294-> 299) | 0.36 ( 290-> 296) | 0.04 ( 290-> 297) |
| 10    | 2.271 | 546.0  | 0.000085 | 0.000103 | -0.059182   | -0.066129   | 0.36 ( 291-> 297) | 0.33 ( 292-> 296) | 0.11 ( 291-> 296) |
| 11    | 2.293 | 540.8  | 0.060485 | 0.072705 | 14.681415   | 16.074370   | 0.58 ( 289-> 296) | 0.16 ( 293-> 296) | 0.05 ( 293-> 297) |
| 12    | 2.294 | 540.5  | 0.063347 | 0.076056 | 14.958323   | 16.375145   | 0.57 ( 289-> 297) | 0.15 ( 293-> 297) | 0.06 ( 293-> 296) |
| 13    | 2.318 | 534.8  | 0.000149 | 0.000176 | -0.388987   | -0.422790   | 0.46 ( 291-> 296) | 0.46 ( 292-> 297) | 0.01 ( 291-> 297) |
| 14    | 2.325 | 533.2  | 0.085548 | 0.102766 | -131.924883 | -144.445611 | 0.39 ( 288-> 297) | 0.20 ( 289-> 296) | 0.14 ( 293-> 296) |
| 15    | 2.325 | 533.2  | 0.078023 | 0.093582 | -125.071529 | -136.822525 | 0.39 ( 288-> 296) | 0.23 ( 289-> 297) | 0.13 ( 293-> 297) |
| 16    | 2.348 | 528.1  | 0.211709 | 0.258106 | 32.322873   | 35.703304   | 0.40 ( 288-> 297) | 0.33 ( 293-> 297) | 0.10 ( 293-> 296) |
| 17    | 2.348 | 528.0  | 0.212492 | 0.259160 | 31.668995   | 34.997658   | 0.40 ( 288-> 296) | 0.32 ( 293-> 296) | 0.10 ( 293-> 297) |
| 18    | 2.399 | 516.8  | 0.011425 | 0.014060 | 145.978564  | 162.122804  | 0.56 ( 290-> 297) | 0.30 ( 294-> 298) | 0.05 ( 294-> 299) |
| 19    | 2.401 | 516.4  | 0.011553 | 0.014256 | 146.137929  | 162.569370  | 0.53 ( 290-> 296) | 0.30 ( 294-> 299) | 0.05 ( 294-> 298) |
| 20    | 2.491 | 497.8  | 0.000002 | 0.000002 | -0.000939   | -0.001175   | 0.75 ( 295-> 300) | 0.06 ( 287-> 297) | 0.06 ( 286-> 296) |
| 21    | 2.512 | 493.6  | 0.000001 | 0.000001 | -0.001618   | -0.001639   | 0.52 ( 295-> 301) | 0.13 ( 287-> 296) | 0.12 ( 286-> 297) |
| 22    | 2.528 | 490.4  | 0.000179 | 0.000193 | -0.382975   | -0.396190   | 0.42 ( 286-> 296) | 0.41 ( 287-> 297) | 0.04 ( 292-> 298) |
| 23    | 2.575 | 481.6  | 0.000162 | 0.000140 | 0.048341    | 0.045126    | 0.28 ( 286-> 296) | 0.27 ( 287-> 297) | 0.17 ( 295-> 300) |
| 24    | 2.576 | 481.4  | 0.004608 | 0.003979 | 1.679382    | 1.560456    | 0.46 ( 286-> 297) | 0.40 ( 287-> 296) | 0.02 ( 295-> 302) |
| 25    | 2.582 | 480.3  | 0.000010 | 0.000008 | 0.005833    | 0.005267    | 0.39 ( 295-> 301) | 0.26 ( 286-> 297) | 0.20 ( 287-> 296) |
| 26    | 2.780 | 446.0  | 0.000004 | 0.000004 | 0.029825    | 0.033459    | 0.38 ( 292-> 298) | 0.36 ( 291-> 299) | 0.06 ( 291-> 298) |











|    |                  |                 |                 |   |                 |                 |                 |
|----|------------------|-----------------|-----------------|---|-----------------|-----------------|-----------------|
| H  | -11.144496000000 | 1.864460000000  | 0.515883000000  | H | 1.091612000000  | 2.718180000000  | 4.027100000000  |
| H  | -8.811080000000  | 2.342232000000  | -0.159070000000 | H | -0.503962000000 | 2.690660000000  | 4.900314000000  |
| H  | -4.591925000000  | -7.845984000000 | -0.381195000000 | O | -0.106412000000 | -0.047070000000 | 4.088854000000  |
| H  | -6.670671000000  | -9.079464000000 | 0.151803000000  | O | -0.063386000000 | 0.019792000000  | -4.089475000000 |
| H  | -8.217074000000  | -8.248784000000 | 1.947699000000  |   |                 |                 |                 |
| H  | -7.650574000000  | -6.139970000000 | 3.198545000000  |   |                 |                 |                 |
| N  | 1.743512000000   | -0.839476000000 | 1.641388000000  |   |                 |                 |                 |
| N  | 1.181335000000   | -3.206046000000 | 1.612749000000  |   |                 |                 |                 |
| N  | 0.659737000000   | 1.779611000000  | 1.647070000000  |   |                 |                 |                 |
| N  | 3.029508000000   | 1.222690000000  | 1.590447000000  |   |                 |                 |                 |
| N  | -1.966468000000  | 0.697873000000  | 1.664863000000  |   |                 |                 |                 |
| N  | -3.248495000000  | -1.364782000000 | 1.588880000000  |   |                 |                 |                 |
| N  | -1.407334000000  | 3.063951000000  | 1.667623000000  |   |                 |                 |                 |
| N  | -5.576665000000  | 0.536562000000  | 1.524704000000  |   |                 |                 |                 |
| N  | -4.380998000000  | 3.384676000000  | 1.570600000000  |   |                 |                 |                 |
| N  | -0.706554000000  | -5.526718000000 | 1.453699000000  |   |                 |                 |                 |
| N  | -3.559857000000  | -4.337629000000 | 1.412941000000  |   |                 |                 |                 |
| N  | 5.351054000000   | -0.667510000000 | 1.449008000000  |   |                 |                 |                 |
| N  | 4.161795000000   | -3.521914000000 | 1.533555000000  |   |                 |                 |                 |
| N  | -0.882190000000  | -1.921533000000 | 1.649189000000  |   |                 |                 |                 |
| C  | 0.059104000000   | 8.003095000000  | 2.462489000000  |   |                 |                 |                 |
| C  | 5.606386000000   | 5.643457000000  | 2.213679000000  |   |                 |                 |                 |
| C  | 6.788080000000   | 6.328337000000  | 2.513286000000  |   |                 |                 |                 |
| C  | 7.087461000000   | 7.540611000000  | 1.862981000000  |   |                 |                 |                 |
| C  | 6.197373000000   | 8.049889000000  | 0.904129000000  |   |                 |                 |                 |
| C  | 5.012045000000   | 7.364051000000  | 0.602785000000  |   |                 |                 |                 |
| C  | 3.463185000000   | 5.384114000000  | 0.966162000000  |   |                 |                 |                 |
| C  | 2.346959000000   | 5.921880000000  | 0.087181000000  |   |                 |                 |                 |
| C  | 1.236828000000   | 6.320663000000  | 1.045751000000  |   |                 |                 |                 |
| C  | 0.980174000000   | 7.727469000000  | 1.419641000000  |   |                 |                 |                 |
| C  | 4.692188000000   | 6.152404000000  | 1.256059000000  |   |                 |                 |                 |
| C  | 1.606919000000   | 8.817185000000  | 0.774129000000  |   |                 |                 |                 |
| C  | 1.329867000000   | 10.135951000000 | 1.161087000000  |   |                 |                 |                 |
| C  | 0.423309000000   | 10.393966000000 | 2.201458000000  |   |                 |                 |                 |
| C  | -0.215931000000  | 9.318770000000  | 2.847894000000  |   |                 |                 |                 |
| H  | -0.430750000000  | 7.146929000000  | 2.951120000000  |   |                 |                 |                 |
| H  | 5.352357000000   | 4.692193000000  | 2.706070000000  |   |                 |                 |                 |
| H  | 7.484945000000   | 5.916989000000  | 3.262978000000  |   |                 |                 |                 |
| H  | 8.018420000000   | 8.082926000000  | 2.098172000000  |   |                 |                 |                 |
| H  | 6.431818000000   | 8.987274000000  | 0.374241000000  |   |                 |                 |                 |
| H  | 4.346927000000   | 7.771321000000  | -0.171012000000 |   |                 |                 |                 |
| H  | 2.668308000000   | 6.751625000000  | -0.564907000000 |   |                 |                 |                 |
| H  | 1.975397000000   | 5.091501000000  | -0.560746000000 |   |                 |                 |                 |
| H  | 2.297697000000   | 8.643288000000  | -0.062096000000 |   |                 |                 |                 |
| H  | 1.820738000000   | 10.970298000000 | 0.634385000000  |   |                 |                 |                 |
| H  | 0.208564000000   | 11.432273000000 | 2.504723000000  |   |                 |                 |                 |
| H  | -0.933316000000  | 9.512565000000  | 3.663112000000  |   |                 |                 |                 |
| N  | 3.343152000000   | 4.197317000000  | 1.514911000000  |   |                 |                 |                 |
| N  | 0.490224000000   | 5.392700000000  | 1.597093000000  |   |                 |                 |                 |
| Mg | -0.112095000000  | -0.072668000000 | 2.039962000000  |   |                 |                 |                 |
| S  | 0.982276000000   | 0.062466000000  | -5.227480000000 |   |                 |                 |                 |
| S  | 0.665491000000   | 0.630754000000  | 5.244849000000  |   |                 |                 |                 |
| C  | 2.452684000000   | 0.415251000000  | 4.906350000000  |   |                 |                 |                 |
| H  | 2.729087000000   | 0.883158000000  | 3.938933000000  |   |                 |                 |                 |
| H  | 2.633475000000   | -0.678682000000 | 4.872884000000  |   |                 |                 |                 |
| H  | 3.015724000000   | 0.870574000000  | 5.749867000000  |   |                 |                 |                 |
| C  | 2.165461000000   | 1.415913000000  | -4.855450000000 |   |                 |                 |                 |
| H  | 2.806185000000   | 1.555015000000  | -5.753088000000 |   |                 |                 |                 |
| H  | 2.774865000000   | 1.182023000000  | -3.959880000000 |   |                 |                 |                 |
| H  | 1.553491000000   | 2.324038000000  | -4.678476000000 |   |                 |                 |                 |
| C  | 2.119008000000   | -1.348056000000 | -4.959818000000 |   |                 |                 |                 |
| H  | 2.872060000000   | -1.340737000000 | -5.777556000000 |   |                 |                 |                 |
| H  | 2.604737000000   | -1.275593000000 | -3.964418000000 |   |                 |                 |                 |
| H  | 1.496779000000   | -2.264274000000 | -5.022006000000 |   |                 |                 |                 |
| C  | 0.574982000000   | 2.442102000000  | 4.967874000000  |   |                 |                 |                 |
| H  | 1.032095000000   | 2.946647000000  | 5.846394000000  |   |                 |                 |                 |

















|     |       |       |          |          |            |            |                   |                   |                   |
|-----|-------|-------|----------|----------|------------|------------|-------------------|-------------------|-------------------|
| 142 | 3.906 | 317.4 | 0.028761 | 0.030810 | 4.225671   | 4.367968   | 0.27 ( 294-> 312) | 0.16 ( 294-> 313) | 0.08 ( 295-> 323) |
| 143 | 3.907 | 317.3 | 0.030101 | 0.032131 | 5.886087   | 6.084105   | 0.27 ( 294-> 313) | 0.16 ( 294-> 312) | 0.05 ( 295-> 323) |
| 144 | 3.913 | 316.9 | 0.000215 | 0.000215 | -5.528626  | -5.429731  | 0.60 ( 294-> 314) | 0.12 ( 294-> 315) | 0.02 ( 295-> 320) |
| 145 | 3.913 | 316.8 | 0.001728 | 0.001849 | -11.418002 | -11.619517 | 0.59 ( 294-> 315) | 0.11 ( 294-> 314) | 0.02 ( 295-> 319) |
| 146 | 3.949 | 313.9 | 0.000044 | 0.000044 | -0.010255  | -0.011067  | 0.26 ( 290-> 302) | 0.19 ( 289-> 301) | 0.18 ( 288-> 300) |
| 147 | 3.987 | 310.9 | 0.122483 | 0.112280 | -0.077363  | -0.075815  | 0.42 ( 271-> 296) | 0.04 ( 283-> 299) | 0.04 ( 282-> 296) |
| 148 | 3.991 | 310.6 | 0.114867 | 0.105385 | -3.329913  | -3.188451  | 0.41 ( 271-> 297) | 0.05 ( 282-> 299) | 0.04 ( 283-> 296) |
| 149 | 3.995 | 310.4 | 0.000101 | 0.000093 | -0.084362  | -0.180744  | 0.20 ( 290-> 303) | 0.13 ( 289-> 301) | 0.13 ( 288-> 300) |
| 150 | 4.009 | 309.3 | 0.000030 | 0.000030 | 0.025172   | 0.063138   | 0.49 ( 295-> 324) | 0.28 ( 295-> 333) | 0.08 ( 295-> 316) |

**Table S16** Hirshfeld surface analysis and two-dimensional fingerprint plots

| $[\text{BuPh}_8\text{Dz}_4\text{PzNi}]_2$           |                      | $[\text{BrStyr}_8\text{Dz}_4\text{PzMg}]_2(\text{DMSO})_2$ |                      |
|-----------------------------------------------------|----------------------|------------------------------------------------------------|----------------------|
| Hirshfeld surfaces                                  | 2D-fingerprint plots | Hirshfeld surfaces                                         | 2D-fingerprint plots |
| <b>D-H...A interactions</b>                         |                      |                                                            |                      |
| <b>C-H<sup>ax</sup>...N<sup>meso</sup> contacts</b> |                      |                                                            |                      |
|                                                     |                      |                                                            |                      |
| <b>Ar-H...Br contacts</b>                           |                      |                                                            |                      |
|                                                     |                      |                                                            |                      |
| <b>C-H...π interactions</b>                         |                      |                                                            |                      |
|                                                     |                      |                                                            |                      |

## $\pi$ - $\pi$ donor-acceptor interactions

### C...C contacts

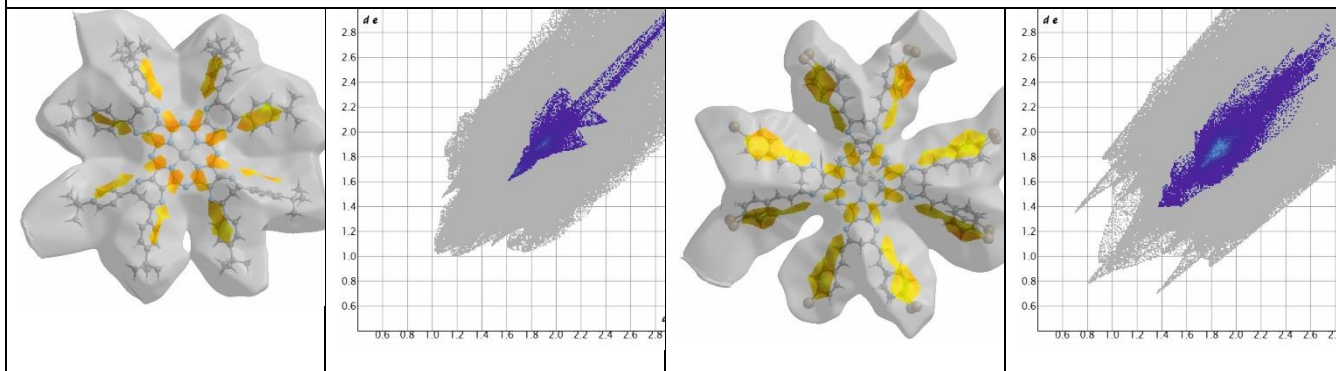

### C...N contacts

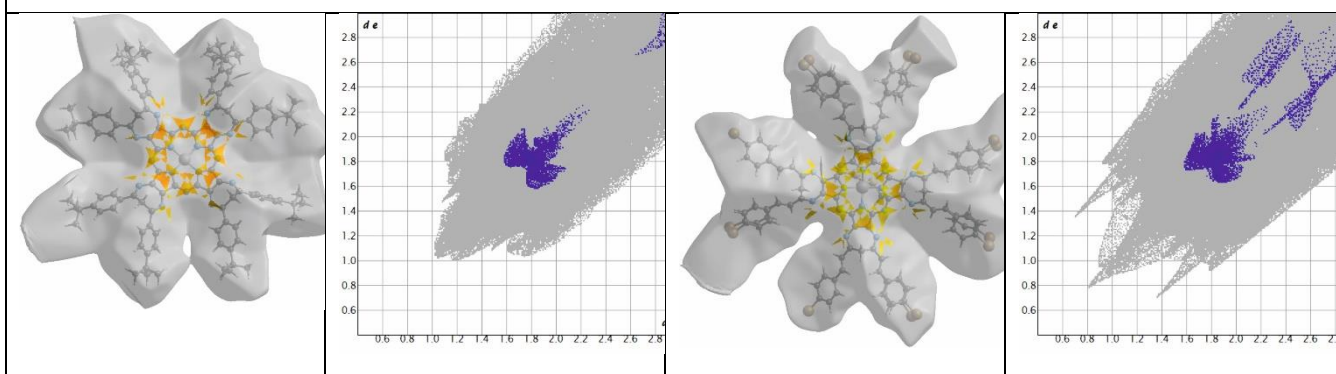

### N...N contacts

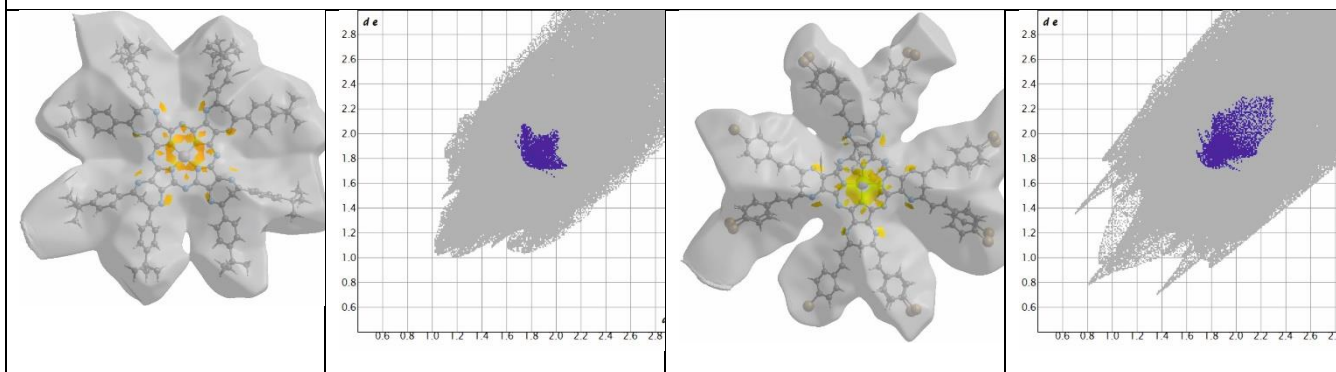

### repulsive interactions

### H...H contacts

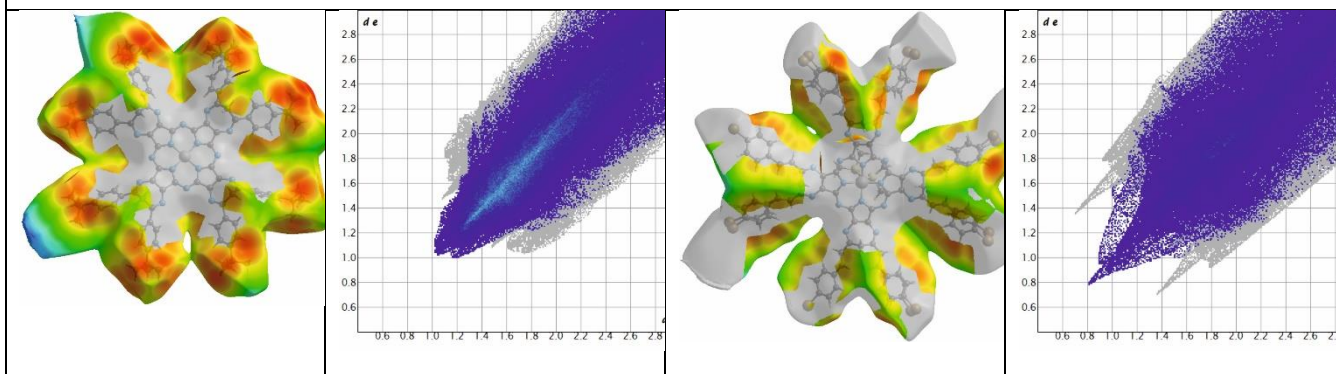

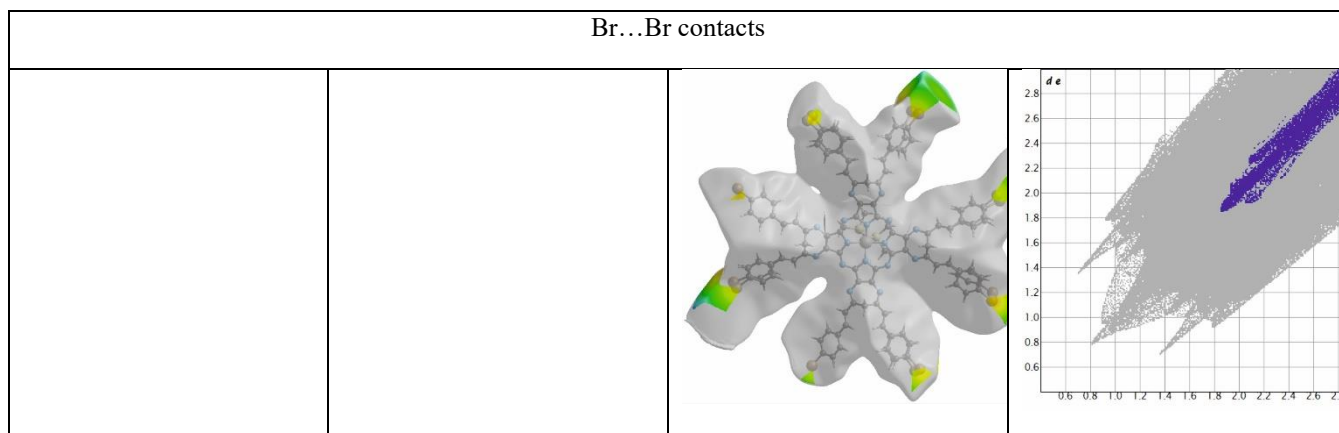

**Table S17** Relative area of the surface corresponding to each kind of interactions

| Contacts                                                             |                                        | Relative area, %                           |                                                            |
|----------------------------------------------------------------------|----------------------------------------|--------------------------------------------|------------------------------------------------------------|
|                                                                      |                                        | $[\text{tBuPh}_8\text{Dz}_4\text{PzNi}]_2$ | $[\text{BrStyr}_8\text{Dz}_4\text{PzMg}]_2(\text{DMSO})_2$ |
| <b>D-H...A interactions</b>                                          | C-H <sup>ax</sup> ...N <sup>meso</sup> | 9.6                                        | 6.9                                                        |
|                                                                      | Ar-H...Br                              | -                                          | 26.5                                                       |
| <b>C-H...<math>\pi</math> interactions</b>                           | C-H...C                                | 13                                         | 9.3                                                        |
| <b><math>\pi</math>-<math>\pi</math> donor-acceptor interactions</b> | C...C                                  | <b>3.6</b>                                 | <b>8</b>                                                   |
|                                                                      | C...N                                  | 1.3                                        | 1.5                                                        |
|                                                                      | N...N                                  | 0.7                                        | 0.9                                                        |
| <b>repulsive interactions</b>                                        | H...H                                  | <b>71.2</b>                                | <b>36.8</b>                                                |
|                                                                      | Br...Br                                | -                                          | 5                                                          |

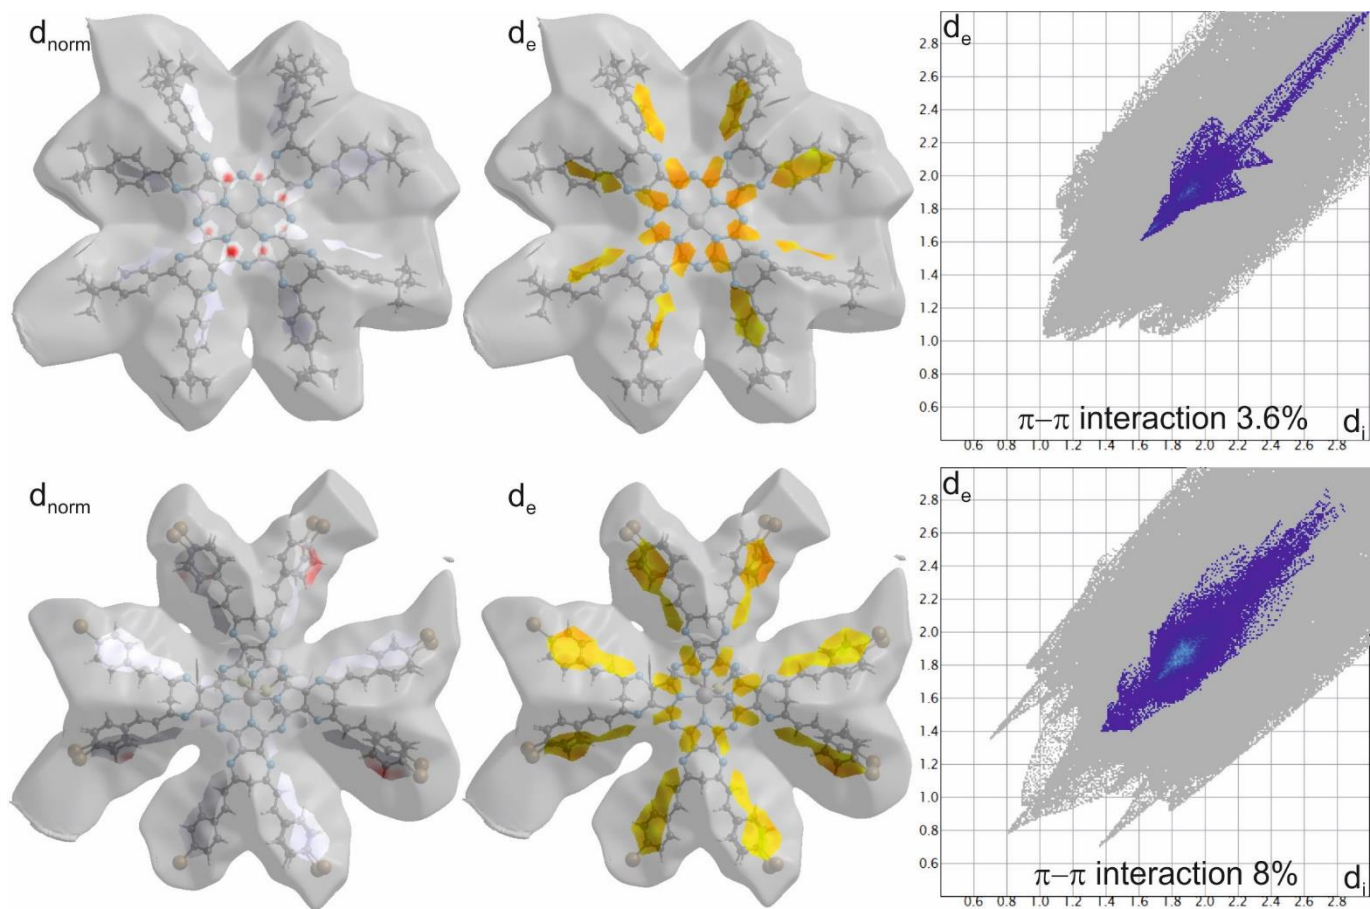

Fig. S15 Hirshfeld surfaces of  $^{\text{Br}}\text{StyrsDz}_4\text{PzMg}\cdot\text{DMSO}$  and  $^{\text{tBu}}\text{Ph}_8\text{Dz}_4\text{PzNi}$  mapped with  $d_{\text{norm}}$  and  $d_e$  for patterns associated with C...C contacts.

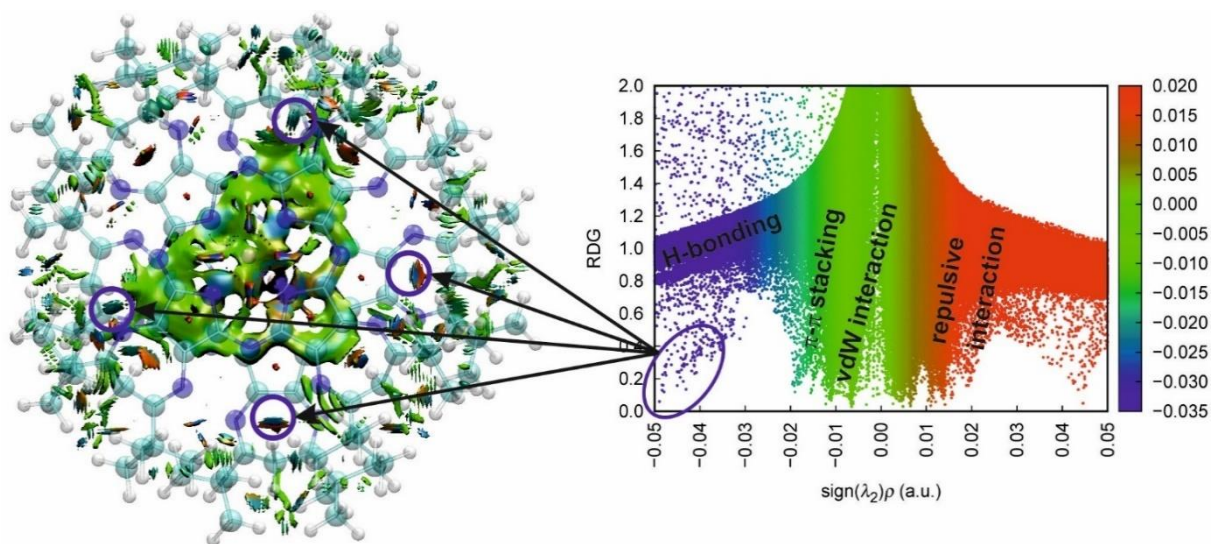

Fig. S16 The RDG isosurface map and 2D scatter plot for  $^{\text{tBu}}\text{Ph}_8\text{Dz}_4\text{PzMg}$  dimeric complex from calculations at CAM-B3LYP def2-SV(P) def2/J level of theory.

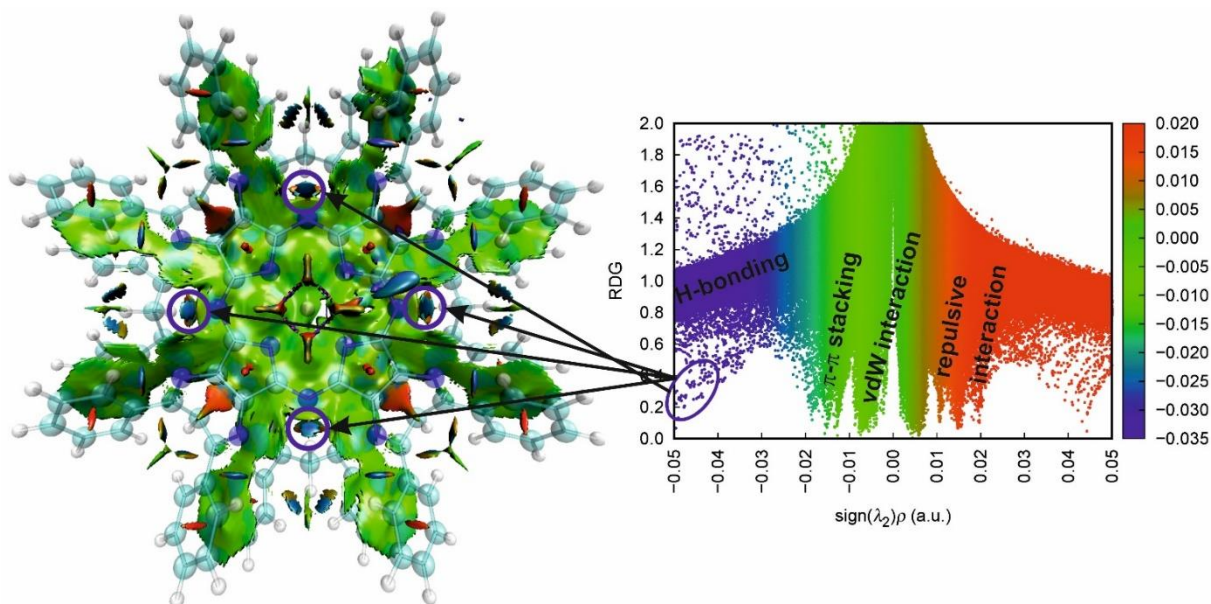

**Fig. S17** The RDG isosurface map and 2D scatter plot for  $\text{Ph}_8\text{Dz}_4\text{PzMg}$  dimeric complex from calculations at CAM-B3LYP def2-SV(P) def2/J level of theory.

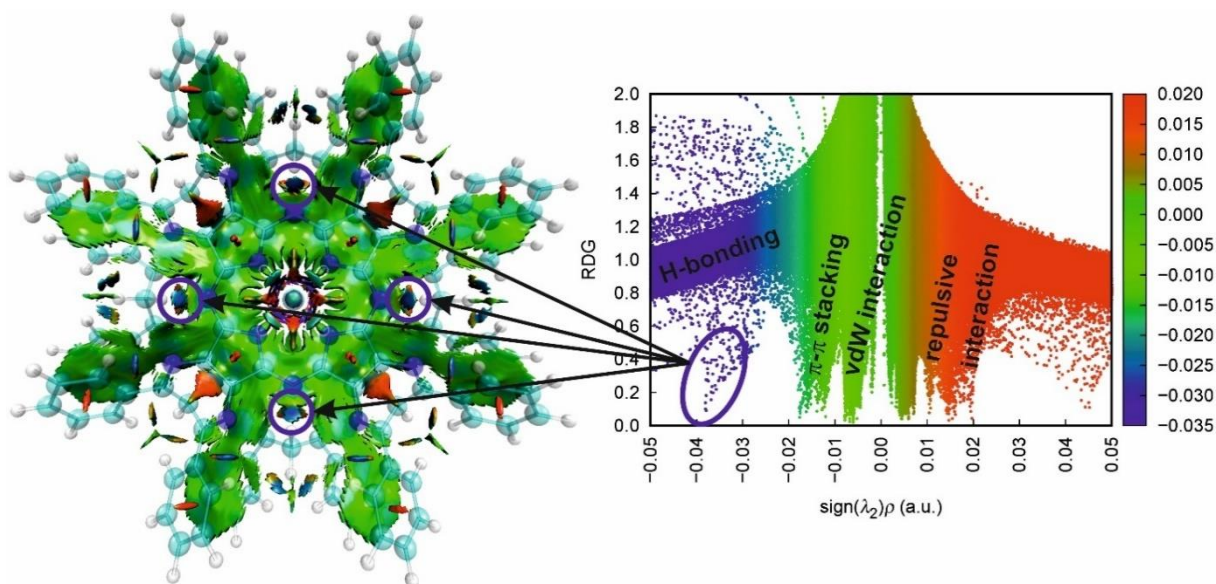

**Fig. S18** The RDG isosurface map and 2D scatter plot for  $\text{Ph}_8\text{Dz}_4\text{PzMg}\cdot\text{F}^-$  dimeric complex from calculations at CAM-B3LYP def2-SV(P) def2/J level of theory.



**Table S18** NBO analysis of dimers

## SECOND ORDER PERTURBATION THEORY ANALYSIS OF FOCK MATRIX IN NBO BASIS

| dimer                                                         | Intermolecular interactions between 6 <i>H</i> -1,4-diazepinoporphyrazine cores in dimers (kcal mol <sup>-1</sup> ) |                                                                                                                                                    |
|---------------------------------------------------------------|---------------------------------------------------------------------------------------------------------------------|----------------------------------------------------------------------------------------------------------------------------------------------------|
|                                                               | C-H <sup>ax</sup> ...N <sup>meso</sup><br>(LP→BD*)                                                                  | C <sup>β</sup> =C <sup>β</sup> , C <sup>β</sup> =C <sup>α</sup> , C <sup>α</sup> =N <sup>pyr</sup> , C <sup>α</sup> =N <sup>meso</sup><br>(BD→BD*) |
| [ <i>t</i> Bu <sub>8</sub> Dz <sub>4</sub> PzMg] <sub>2</sub> | 2.8                                                                                                                 | 16.4                                                                                                                                               |
| [Ph <sub>8</sub> Dz <sub>4</sub> PzMg] <sub>2</sub>           | 16.9                                                                                                                | 13.8                                                                                                                                               |
| [Ph <sub>8</sub> Dz <sub>4</sub> PzMg·DMSO] <sub>2</sub>      | 16.4                                                                                                                | 18.2                                                                                                                                               |
| [Ph <sub>8</sub> Dz <sub>4</sub> PzMg F] <sub>2</sub>         | 17.9                                                                                                                | 16.6                                                                                                                                               |
|                                                               | Intramolecular interactions in 6 <i>H</i> -1,4-diazepinoporphyrazine core in dimers (kcal mol <sup>-1</sup> )       |                                                                                                                                                    |
|                                                               | N <sup>pyr</sup> with Mg <sup>2+</sup><br>(LP→LU, RY)                                                               | C <sup>α</sup> =N <sup>pyr</sup> , C <sup>α</sup> =N <sup>meso</sup> with Mg <sup>2+</sup><br>(BD→LU, RY)                                          |
| [Ph <sub>8</sub> Dz <sub>4</sub> PzMg] <sub>2</sub>           | 143.1                                                                                                               | 64.9                                                                                                                                               |
| [Ph <sub>8</sub> Dz <sub>4</sub> PzMg·DMSO] <sub>2</sub>      | 134.0                                                                                                               | 86.5                                                                                                                                               |
| [Ph <sub>8</sub> Dz <sub>4</sub> PzMg F] <sub>2</sub>         | 105.0                                                                                                               | 53.1                                                                                                                                               |

**Table S19** Atomic dipole corrected Hirshfeld atomic charge (ADCH) of [Ph<sub>8</sub>Dz<sub>4</sub>PzMg·DMSO]<sub>2</sub> (dimer with coordinated DMSO molecule)

|               |             |               |             |                |             |
|---------------|-------------|---------------|-------------|----------------|-------------|
| Atom 1 (C) :  | 0.03398728  | Atom 44 (C) : | -0.25138842 | Atom 87 (H) :  | 0.10410107  |
| Atom 2 (C) :  | 0.01442596  | Atom 45 (C) : | -0.02476655 | Atom 88 (H) :  | 0.14525776  |
| Atom 3 (C) :  | 0.28713053  | Atom 46 (C) : | -0.22416020 | Atom 89 (H) :  | 0.10974394  |
| Atom 4 (C) :  | 0.00335813  | Atom 47 (C) : | 0.02517453  | Atom 90 (H) :  | 0.11891238  |
| Atom 5 (C) :  | 0.27772921  | Atom 48 (C) : | -0.17374800 | Atom 91 (H) :  | 0.11645233  |
| Atom 6 (C) :  | 0.04431991  | Atom 49 (C) : | -0.13950101 | Atom 92 (H) :  | 0.28097173  |
| Atom 7 (C) :  | 0.04663876  | Atom 50 (C) : | -0.52404298 | Atom 93 (H) :  | 0.30057473  |
| Atom 8 (C) :  | 0.20431000  | Atom 51 (C) : | 0.15723593  | Atom 94 (H) :  | 0.20264936  |
| Atom 9 (C) :  | -0.06685737 | Atom 52 (C) : | -0.05610596 | Atom 95 (H) :  | 0.28600159  |
| Atom 10 (C) : | 0.19619456  | Atom 53 (C) : | -0.06112519 | Atom 96 (H) :  | 0.20224018  |
| Atom 11 (C) : | -0.06004934 | Atom 54 (C) : | -0.06241166 | Atom 97 (H) :  | 0.10474666  |
| Atom 12 (C) : | 0.05598729  | Atom 55 (C) : | -0.05443634 | Atom 98 (N) :  | -0.20689652 |
| Atom 13 (C) : | 0.07266054  | Atom 56 (C) : | -0.34938121 | Atom 99 (N) :  | -0.30513331 |
| Atom 14 (C) : | 0.14135916  | Atom 57 (C) : | -0.39879798 | Atom 100 (N) : | -0.19692560 |
| Atom 15 (C) : | -0.04081096 | Atom 58 (C) : | -0.17730118 | Atom 101 (N) : | -0.27351104 |
| Atom 16 (C) : | 0.19659257  | Atom 59 (C) : | -0.14511861 | Atom 102 (N) : | -0.23083012 |
| Atom 17 (C) : | -0.38268596 | Atom 60 (C) : | -0.52753836 | Atom 103 (N) : | -0.31066815 |
| Atom 18 (C) : | 0.02358555  | Atom 61 (C) : | 0.13079419  | Atom 104 (N) : | -0.31054476 |
| Atom 19 (C) : | 0.05481706  | Atom 62 (H) : | 0.12376437  | Atom 105 (N) : | -0.21728426 |
| Atom 20 (C) : | 0.20665976  | Atom 63 (H) : | 0.10836312  | Atom 106 (N) : | -0.22642458 |
| Atom 21 (C) : | -0.46434157 | Atom 64 (H) : | 0.11815043  | Atom 107 (N) : | -0.21877591 |
| Atom 22 (C) : | 0.26849680  | Atom 65 (H) : | 0.11484628  | Atom 108 (N) : | -0.22010526 |
| Atom 23 (C) : | -0.26949449 | Atom 66 (H) : | 0.30474801  | Atom 109 (N) : | -0.22795230 |
| Atom 24 (C) : | -0.36876717 | Atom 67 (H) : | 0.32857655  | Atom 110 (N) : | -0.21274374 |
| Atom 25 (C) : | -0.01781918 | Atom 68 (H) : | 0.28944860  | Atom 111 (N) : | -0.27124039 |
| Atom 26 (C) : | 0.14177671  | Atom 69 (H) : | 0.11703838  | Atom 112 (C) : | -0.45547251 |
| Atom 27 (C) : | -0.70518041 | Atom 70 (H) : | 0.11112435  | Atom 113 (C) : | -0.07013473 |
| Atom 28 (C) : | 0.16746911  | Atom 71 (H) : | 0.41417079  | Atom 114 (C) : | -0.06380393 |
| Atom 29 (C) : | -0.11891009 | Atom 72 (H) : | 0.25040892  | Atom 115 (C) : | -0.05666427 |
| Atom 30 (C) : | 0.18597723  | Atom 73 (H) : | 0.12239365  | Atom 116 (C) : | -0.34776176 |
| Atom 31 (C) : | -0.33493041 | Atom 74 (H) : | 0.29244264  | Atom 117 (C) : | -0.37371637 |
| Atom 32 (C) : | 0.23954063  | Atom 75 (H) : | 0.29498831  | Atom 118 (C) : | 0.15717310  |
| Atom 33 (C) : | 0.15386817  | Atom 76 (H) : | 0.22567981  | Atom 119 (C) : | -0.11841070 |
| Atom 34 (C) : | -0.12163967 | Atom 77 (H) : | 0.10511741  | Atom 120 (C) : | 0.15455119  |
| Atom 35 (C) : | 0.16379354  | Atom 78 (H) : | 0.05269547  | Atom 121 (C) : | -0.15720548 |
| Atom 36 (C) : | -0.64560935 | Atom 79 (H) : | 0.11016552  | Atom 122 (C) : | -0.00984622 |
| Atom 37 (C) : | -0.12860940 | Atom 80 (H) : | 0.05375129  | Atom 123 (C) : | -0.14423113 |
| Atom 38 (C) : | 0.24983419  | Atom 81 (H) : | 0.10244006  | Atom 124 (C) : | -0.12977212 |
| Atom 39 (C) : | -0.11727306 | Atom 82 (H) : | 0.05283187  | Atom 125 (C) : | -0.61383369 |
| Atom 40 (C) : | 0.27319611  | Atom 83 (H) : | 0.29366671  | Atom 126 (C) : | 0.25765248  |
| Atom 41 (C) : | -0.19860575 | Atom 84 (H) : | 0.20679472  | Atom 127 (H) : | 0.35697037  |
| Atom 42 (C) : | -0.22559982 | Atom 85 (H) : | 0.28476899  | Atom 128 (H) : | 0.10655462  |
| Atom 43 (C) : | -0.14824756 | Atom 86 (H) : | 0.20088122  | Atom 129 (H) : | 0.11855307  |

|                 |             |                |             |                 |             |
|-----------------|-------------|----------------|-------------|-----------------|-------------|
| Atom 130 (H) :  | 0.11624936  | Atom 188 (C) : | -0.19727321 | Atom 246 (N) :  | -0.21636619 |
| Atom 131 (H) :  | 0.27222416  | Atom 189 (C) : | -0.22399328 | Atom 247 (N) :  | -0.21538473 |
| Atom 132 (H) :  | 0.29387954  | Atom 190 (C) : | -0.30142058 | Atom 248 (N) :  | -0.20710629 |
| Atom 133 (H) :  | 0.10407297  | Atom 191 (C) : | -0.04607478 | Atom 249 (N) :  | -0.20944236 |
| Atom 134 (H) :  | 0.05404834  | Atom 192 (C) : | 0.08484583  | Atom 250 (N) :  | -0.23570018 |
| Atom 135 (H) :  | 0.21595679  | Atom 193 (C) : | -0.50711349 | Atom 251 (N) :  | -0.22227549 |
| Atom 136 (H) :  | 0.30648619  | Atom 194 (C) : | -0.16959617 | Atom 252 (N) :  | -0.27381366 |
| Atom 137 (H) :  | 0.23782434  | Atom 195 (C) : | 0.20696110  | Atom 253 (C) :  | -0.72958968 |
| Atom 138 (H) :  | 0.10846981  | Atom 196 (C) : | -0.62133470 | Atom 254 (C) :  | -0.51685103 |
| Atom 139 (N) :  | -0.22934928 | Atom 197 (C) : | -0.13917595 | Atom 255 (C) :  | 0.30002877  |
| Atom 140 (N) :  | -0.23631815 | Atom 198 (C) : | -0.19743236 | Atom 256 (C) :  | -0.68966197 |
| Atom 141 (Mg) : | 0.32847896  | Atom 199 (C) : | -0.20946325 | Atom 257 (C) :  | -0.10762109 |
| Atom 142 (C) :  | 0.03043250  | Atom 200 (C) : | -0.13321604 | Atom 258 (C) :  | -0.18081718 |
| Atom 143 (C) :  | 0.01225424  | Atom 201 (C) : | -0.65821578 | Atom 259 (C) :  | 0.23931749  |
| Atom 144 (C) :  | 0.29268543  | Atom 202 (C) : | 0.23078316  | Atom 260 (C) :  | -0.11711503 |
| Atom 145 (C) :  | -0.25960287 | Atom 203 (H) : | 0.22657076  | Atom 261 (C) :  | 0.16530522  |
| Atom 146 (C) :  | 0.27506389  | Atom 204 (H) : | 0.23779568  | Atom 262 (C) :  | -0.10741299 |
| Atom 147 (C) :  | 0.04859931  | Atom 205 (H) : | 0.10312309  | Atom 263 (C) :  | -0.24284101 |
| Atom 148 (C) :  | 0.05098942  | Atom 206 (H) : | 0.11584499  | Atom 264 (C) :  | -0.19528208 |
| Atom 149 (C) :  | 0.20793396  | Atom 207 (H) : | 0.26722738  | Atom 265 (C) :  | -0.13946265 |
| Atom 150 (C) :  | -0.36679369 | Atom 208 (H) : | 0.26263896  | Atom 266 (C) :  | -0.74555325 |
| Atom 151 (C) :  | 0.19448979  | Atom 209 (H) : | 0.35323995  | Atom 267 (C) :  | 0.37924474  |
| Atom 152 (C) :  | 0.08715426  | Atom 210 (H) : | 0.11569304  | Atom 268 (H) :  | 0.48707399  |
| Atom 153 (C) :  | 0.05544445  | Atom 211 (H) : | 0.11890234  | Atom 269 (H) :  | 0.36364088  |
| Atom 154 (C) :  | 0.06316486  | Atom 212 (H) : | 0.10887591  | Atom 270 (H) :  | 0.12517946  |
| Atom 155 (C) :  | 0.14641906  | Atom 213 (H) : | 0.15594174  | Atom 271 (H) :  | 0.29582799  |
| Atom 156 (C) :  | -0.05285989 | Atom 214 (H) : | -0.08928875 | Atom 272 (H) :  | 0.30274329  |
| Atom 157 (C) :  | 0.19565140  | Atom 215 (H) : | 0.17594954  | Atom 273 (H) :  | 0.24692869  |
| Atom 158 (C) :  | -0.33275937 | Atom 216 (H) : | 0.27411226  | Atom 274 (H) :  | 0.10108751  |
| Atom 159 (C) :  | 0.02454820  | Atom 217 (H) : | 0.19490200  | Atom 275 (H) :  | 0.05399934  |
| Atom 160 (C) :  | 0.04781072  | Atom 218 (H) : | 0.05338661  | Atom 276 (H) :  | 0.25655485  |
| Atom 161 (C) :  | 0.22279097  | Atom 219 (H) : | 0.10410138  | Atom 277 (H) :  | 0.35114311  |
| Atom 162 (C) :  | -0.25808067 | Atom 220 (H) : | 0.05185524  | Atom 278 (H) :  | 0.29841619  |
| Atom 163 (C) :  | 0.27138844  | Atom 221 (H) : | 0.10198377  | Atom 279 (H) :  | 0.11221425  |
| Atom 164 (C) :  | -0.47615316 | Atom 222 (H) : | 0.05290343  | Atom 280 (N) :  | -0.22872684 |
| Atom 165 (C) :  | -0.43910386 | Atom 223 (H) : | 0.10847815  | Atom 281 (N) :  | -0.21899260 |
| Atom 166 (C) :  | -0.02894873 | Atom 224 (H) : | 0.32856953  | Atom 282 (Mg) : | 0.32960492  |
| Atom 167 (C) :  | -0.05375248 | Atom 225 (H) : | 0.26785157  | Atom 283 (S) :  | 0.29987294  |
| Atom 168 (C) :  | -0.06587397 | Atom 226 (H) : | 0.24869026  | Atom 284 (S) :  | 0.30148433  |
| Atom 169 (C) :  | 0.13062357  | Atom 227 (H) : | 0.11668324  | Atom 285 (C) :  | -0.22546636 |
| Atom 170 (C) :  | -0.11746393 | Atom 228 (H) : | 0.10711640  | Atom 286 (H) :  | 0.08288785  |
| Atom 171 (C) :  | 0.25854398  | Atom 229 (H) : | 0.33457006  | Atom 287 (H) :  | 0.12386139  |
| Atom 172 (C) :  | -0.18578643 | Atom 230 (H) : | 0.22623898  | Atom 288 (H) :  | 0.13380141  |
| Atom 173 (C) :  | 0.69217249  | Atom 231 (H) : | 0.09991663  | Atom 289 (C) :  | -0.22729572 |
| Atom 174 (C) :  | 0.26525854  | Atom 232 (H) : | 0.22617151  | Atom 290 (H) :  | 0.13610003  |
| Atom 175 (C) :  | -0.11764808 | Atom 233 (H) : | 0.31906638  | Atom 291 (H) :  | 0.08380896  |
| Atom 176 (C) :  | 0.23709221  | Atom 234 (H) : | 0.22384484  | Atom 292 (H) :  | 0.12416598  |
| Atom 177 (C) :  | -0.75213356 | Atom 235 (H) : | 0.22670042  | Atom 293 (C) :  | -0.22571009 |
| Atom 178 (C) :  | -0.05397133 | Atom 236 (H) : | 0.30313452  | Atom 294 (H) :  | 0.13256471  |
| Atom 179 (C) :  | 0.16024665  | Atom 237 (H) : | 0.29265835  | Atom 295 (H) :  | 0.08437918  |
| Atom 180 (C) :  | -0.12403901 | Atom 238 (H) : | 0.11871050  | Atom 296 (H) :  | 0.12660822  |
| Atom 181 (C) :  | 0.14982167  | Atom 239 (N) : | -0.20759517 | Atom 297 (C) :  | -0.22793747 |
| Atom 182 (C) :  | -0.13861347 | Atom 240 (N) : | -0.30685875 | Atom 298 (H) :  | 0.13477503  |
| Atom 183 (C) :  | -0.29071727 | Atom 241 (N) : | -0.20019877 | Atom 299 (H) :  | 0.08527372  |
| Atom 184 (C) :  | 0.02668769  | Atom 242 (N) : | -0.27633956 | Atom 300 (H) :  | 0.12706759  |
| Atom 185 (C) :  | -0.20854878 | Atom 243 (N) : | -0.24118963 | Atom 301 (O) :  | -0.37095713 |
| Atom 186 (C) :  | -0.16663738 | Atom 244 (N) : | -0.31141074 | Atom 302 (O) :  | -0.36912006 |
| Atom 187 (C) :  | -0.23430644 | Atom 245 (N) : | -0.30693720 |                 |             |

**Table S20** Atomic dipole corrected Hirshfeld atomic charge (ADCH) of  $[\text{Ph}_8\text{Dz}_4\text{PzMg-F}]_2$  (dimer with coordinated F<sup>-</sup> anion)

|              |             |              |            |               |             |
|--------------|-------------|--------------|------------|---------------|-------------|
| Atom 1 (C) : | 0.01841595  | Atom 5 (C) : | 0.28383782 | Atom 9 (C) :  | -0.07194000 |
| Atom 2 (C) : | 0.01054241  | Atom 6 (C) : | 0.00983706 | Atom 10 (C) : | 0.27897241  |
| Atom 3 (C) : | 0.28184704  | Atom 7 (C) : | 0.01745607 | Atom 11 (C) : | 0.35054289  |
| Atom 4 (C) : | -0.36076256 | Atom 8 (C) : | 0.27931926 | Atom 12 (C) : | 0.01126031  |

|               |             |                 |             |                |              |
|---------------|-------------|-----------------|-------------|----------------|--------------|
| Atom 13 (C) : | 0.01522474  | Atom 79 (H) :   | 0.10105191  | Atom 145 (C) : | -0.50649949  |
| Atom 14 (C) : | 0.28880926  | Atom 80 (H) :   | 0.05526169  | Atom 146 (C) : | 0.28169810   |
| Atom 15 (C) : | -1.23144338 | Atom 81 (H) :   | 0.09647290  | Atom 147 (C) : | 0.01061441   |
| Atom 16 (C) : | 0.28972675  | Atom 82 (H) :   | 0.05387241  | Atom 148 (C) : | 0.01755664   |
| Atom 17 (C) : | -0.26610863 | Atom 83 (H) :   | 0.35062422  | Atom 149 (C) : | 0.28323594   |
| Atom 18 (C) : | 0.011194639 | Atom 84 (H) :   | 0.28410854  | Atom 150 (C) : | -0.75582031  |
| Atom 19 (C) : | 0.01214046  | Atom 85 (H) :   | 0.42449489  | Atom 151 (C) : | 0.28420807   |
| Atom 20 (C) : | 0.28187295  | Atom 86 (H) :   | 0.31952837  | Atom 152 (C) : | 0.51669436   |
| Atom 21 (C) : | -0.51691522 | Atom 87 (H) :   | 0.11827258  | Atom 153 (C) : | 0.01674854   |
| Atom 22 (C) : | 0.29015583  | Atom 88 (H) :   | 0.40966347  | Atom 154 (C) : | 0.01013233   |
| Atom 23 (C) : | -0.31749538 | Atom 89 (H) :   | 0.11037316  | Atom 155 (C) : | 0.28516212   |
| Atom 24 (C) : | -0.52347737 | Atom 90 (H) :   | 0.13365031  | Atom 156 (C) : | -1.00854688  |
| Atom 25 (C) : | 0.02758489  | Atom 91 (H) :   | 0.45046033  | Atom 157 (C) : | 0.28197998   |
| Atom 26 (C) : | 0.13195183  | Atom 92 (H) :   | 0.39547133  | Atom 158 (C) : | -0.25950194  |
| Atom 27 (C) : | -0.69810230 | Atom 93 (H) :   | 0.40480264  | Atom 159 (C) : | 0.01654045   |
| Atom 28 (C) : | 0.15215204  | Atom 94 (H) :   | 0.23672953  | Atom 160 (C) : | 0.01125467   |
| Atom 29 (C) : | -0.12391843 | Atom 95 (H) :   | 0.35638471  | Atom 161 (C) : | 0.28586727   |
| Atom 30 (C) : | 0.20008985  | Atom 96 (H) :   | 0.34280731  | Atom 162 (C) : | -0.34773608  |
| Atom 31 (C) : | -0.24650025 | Atom 97 (H) :   | 0.11954120  | Atom 163 (C) : | 0.28606416   |
| Atom 32 (C) : | 0.25781949  | Atom 98 (N) :   | -0.26104977 | Atom 164 (C) : | -0.48243996  |
| Atom 33 (C) : | 0.15339990  | Atom 99 (N) :   | -0.31195349 | Atom 165 (C) : | -0.47476460  |
| Atom 34 (C) : | -0.12944875 | Atom 100 (N) :  | -0.26345075 | Atom 166 (C) : | -0.01406062  |
| Atom 35 (C) : | 0.19556576  | Atom 101 (N) :  | -0.31308246 | Atom 167 (C) : | -0.06590230  |
| Atom 36 (C) : | -0.84666216 | Atom 102 (N) :  | -0.26439691 | Atom 168 (C) : | -0.03891701  |
| Atom 37 (C) : | -0.22176357 | Atom 103 (N) :  | -0.31448289 | Atom 169 (C) : | 0.15226507   |
| Atom 38 (C) : | 0.27726965  | Atom 104 (N) :  | -0.31295822 | Atom 170 (C) : | -0.12336656  |
| Atom 39 (C) : | -0.12180773 | Atom 105 (N) :  | -0.20877297 | Atom 171 (C) : | 0.22999812   |
| Atom 40 (C) : | 0.28745451  | Atom 106 (N) :  | -0.20689575 | Atom 172 (C) : | -0.19563421  |
| Atom 41 (C) : | -0.22107819 | Atom 107 (N) :  | -0.19875986 | Atom 173 (C) : | 0.20017519   |
| Atom 42 (C) : | -0.31027751 | Atom 108 (N) :  | -0.22188441 | Atom 174 (C) : | 0.28612881   |
| Atom 43 (C) : | -0.10575914 | Atom 109 (N) :  | -0.19348150 | Atom 175 (C) : | -0.12060870  |
| Atom 44 (C) : | -0.18751734 | Atom 110 (N) :  | -0.20582357 | Atom 176 (C) : | 0.23494559   |
| Atom 45 (C) : | -0.05010413 | Atom 111 (N) :  | -0.26161068 | Atom 177 (C) : | -0.69349452  |
| Atom 46 (C) : | -0.17609091 | Atom 112 (C) :  | -0.79100045 | Atom 178 (C) : | -0.22668681  |
| Atom 47 (C) : | 0.01665843  | Atom 113 (C) :  | -0.40726411 | Atom 179 (C) : | 0.19572928   |
| Atom 48 (C) : | -0.21770517 | Atom 114 (C) :  | 0.26489060  | Atom 180 (C) : | -0.123368105 |
| Atom 49 (C) : | -0.23367905 | Atom 115 (C) :  | -0.86953022 | Atom 181 (C) : | 0.16952450   |
| Atom 50 (C) : | -0.90249906 | Atom 116 (C) :  | -0.21651829 | Atom 182 (C) : | -0.15387731  |
| Atom 51 (C) : | 0.46419807  | Atom 117 (C) :  | -0.21948330 | Atom 183 (C) : | -0.30622940  |
| Atom 52 (C) : | -0.59748493 | Atom 118 (C) :  | 0.25464531  | Atom 184 (C) : | -0.02783085  |
| Atom 53 (C) : | -0.03253978 | Atom 119 (C) :  | -0.12112764 | Atom 185 (C) : | -0.03992236  |
| Atom 54 (C) : | 0.23950023  | Atom 120 (C) :  | 0.18971374  | Atom 186 (C) : | -0.11311069  |
| Atom 55 (C) : | -0.93527609 | Atom 121 (C) :  | -0.08475798 | Atom 187 (C) : | -0.10949302  |
| Atom 56 (C) : | -0.33612938 | Atom 122 (C) :  | -0.33591166 | Atom 188 (C) : | -0.07986400  |
| Atom 57 (C) : | -0.44623138 | Atom 123 (C) :  | -0.25074579 | Atom 189 (C) : | -0.33201095  |
| Atom 58 (C) : | -0.16966505 | Atom 124 (C) :  | -0.25377532 | Atom 190 (C) : | -0.00841888  |
| Atom 59 (C) : | -0.22691255 | Atom 125 (C) :  | -0.63179168 | Atom 191 (C) : | -0.56152472  |
| Atom 60 (C) : | -0.79856528 | Atom 126 (C) :  | 0.41966150  | Atom 192 (C) : | -0.27610563  |
| Atom 61 (C) : | 0.26224759  | Atom 127 (H) :  | 0.45819465  | Atom 193 (C) : | -0.87906524  |
| Atom 62 (H) : | 0.31159586  | Atom 128 (H) :  | 0.37226372  | Atom 194 (C) : | -0.51576491  |
| Atom 63 (H) : | 0.11210606  | Atom 129 (H) :  | 0.14415186  | Atom 195 (C) : | 0.33165450   |
| Atom 64 (H) : | 0.14587333  | Atom 130 (H) :  | 0.39267289  | Atom 196 (C) : | -0.80335855  |
| Atom 65 (H) : | 0.52383390  | Atom 131 (H) :  | 0.38635657  | Atom 197 (C) : | -0.27387324  |
| Atom 66 (H) : | 0.48020302  | Atom 132 (H) :  | 0.30460954  | Atom 198 (C) : | -0.18181332  |
| Atom 67 (H) : | 0.38003525  | Atom 133 (H) :  | 0.09511049  | Atom 199 (C) : | -0.25368745  |
| Atom 68 (H) : | 0.31389392  | Atom 134 (H) :  | 0.05447175  | Atom 200 (C) : | -0.26809291  |
| Atom 69 (H) : | 0.10388509  | Atom 135 (H) :  | 0.26533238  | Atom 201 (C) : | -0.72153705  |
| Atom 70 (H) : | 0.12038246  | Atom 136 (H) :  | 0.44195045  | Atom 202 (C) : | 0.29555890   |
| Atom 71 (H) : | 0.38717139  | Atom 137 (H) :  | 0.14796393  | Atom 203 (H) : | 0.33606865   |
| Atom 72 (H) : | 0.21186088  | Atom 138 (H) :  | 0.17226459  | Atom 204 (H) : | 0.38359076   |
| Atom 73 (H) : | 0.16318827  | Atom 139 (N) :  | -0.19760536 | Atom 205 (H) : | 0.15351634   |
| Atom 74 (H) : | 0.36254375  | Atom 140 (N) :  | -0.21135447 | Atom 206 (H) : | 0.43413708   |
| Atom 75 (H) : | 0.38112082  | Atom 141 (Mg) : | 0.36777738  | Atom 207 (H) : | 0.44070277   |
| Atom 76 (H) : | 0.26263937  | Atom 142 (C) :  | 0.01547619  | Atom 208 (H) : | 0.30937719   |
| Atom 77 (H) : | 0.09613901  | Atom 143 (C) :  | 0.00767002  | Atom 209 (H) : | 0.36138887   |
| Atom 78 (H) : | 0.05382883  | Atom 144 (C) :  | 0.28501889  | Atom 210 (H) : | 0.09958669   |

|                 |            |                 |             |                 |             |
|-----------------|------------|-----------------|-------------|-----------------|-------------|
| Atom 211 (H ) : | 0.11021104 | Atom 236 (H ) : | 0.34205229  | Atom 261 (C ) : | 0.20662639  |
| Atom 212 (H ) : | 0.11010629 | Atom 237 (H ) : | 0.36064481  | Atom 262 (C ) : | -0.11231648 |
| Atom 213 (H ) : | 0.25312117 | Atom 238 (H ) : | 0.10974219  | Atom 263 (C ) : | -0.34255020 |
| Atom 214 (H ) : | 0.13552697 | Atom 239 (N ) : | -0.26132783 | Atom 264 (C ) : | -0.26020126 |
| Atom 215 (H ) : | 0.26117984 | Atom 240 (N ) : | -0.31099051 | Atom 265 (C ) : | -0.22456596 |
| Atom 216 (H ) : | 0.36163474 | Atom 241 (N ) : | -0.26232535 | Atom 266 (C ) : | -0.97954699 |
| Atom 217 (H ) : | 0.24834581 | Atom 242 (N ) : | -0.31314844 | Atom 267 (C ) : | 0.44215679  |
| Atom 218 (H ) : | 0.05438906 | Atom 243 (N ) : | -0.26290430 | Atom 268 (H ) : | 0.47454688  |
| Atom 219 (H ) : | 0.09765737 | Atom 244 (N ) : | -0.31462635 | Atom 269 (H ) : | 0.33353623  |
| Atom 220 (H ) : | 0.05349908 | Atom 245 (N ) : | -0.31320579 | Atom 270 (H ) : | 0.13296624  |
| Atom 221 (H ) : | 0.09591708 | Atom 246 (N ) : | -0.20780233 | Atom 271 (H ) : | 0.45708812  |
| Atom 222 (H ) : | 0.05468043 | Atom 247 (N ) : | -0.18626861 | Atom 272 (H ) : | 0.36780290  |
| Atom 223 (H ) : | 0.09846450 | Atom 248 (N ) : | -0.20020433 | Atom 273 (H ) : | 0.30410915  |
| Atom 224 (H ) : | 0.33627295 | Atom 249 (N ) : | -0.21856676 | Atom 274 (H ) : | 0.09448987  |
| Atom 225 (H ) : | 0.34412410 | Atom 250 (N ) : | -0.20730128 | Atom 275 (H ) : | 0.05413930  |
| Atom 226 (H ) : | 0.35150085 | Atom 251 (N ) : | -0.21093806 | Atom 276 (H ) : | 0.29490387  |
| Atom 227 (H ) : | 0.09706503 | Atom 252 (N ) : | -0.26322323 | Atom 277 (H ) : | 0.44333215  |
| Atom 228 (H ) : | 0.69681938 | Atom 253 (C ) : | -0.74339246 | Atom 278 (H ) : | 0.37945269  |
| Atom 229 (H ) : | 0.43863267 | Atom 254 (C ) : | -0.35721600 | Atom 279 (H ) : | 0.15567580  |
| Atom 230 (H ) : | 0.39116044 | Atom 255 (C ) : | 0.27266151  | Atom 280 (N ) : | -0.19416610 |
| Atom 231 (H ) : | 0.09164184 | Atom 256 (C ) : | -0.91714243 | Atom 281 (N ) : | -0.20336222 |
| Atom 232 (H ) : | 0.36249683 | Atom 257 (C ) : | -0.28509751 | Atom 282 (Mg) : | 0.36802061  |
| Atom 233 (H ) : | 0.36716074 | Atom 258 (C ) : | -0.14414342 | Atom 283 (F ) : | -0.54829594 |
| Atom 234 (H ) : | 0.26949863 | Atom 259 (C ) : | 0.24848695  | Atom 284 (F ) : | -0.54823950 |
| Atom 235 (H ) : | 0.27414378 | Atom 260 (C ) : | -0.12201835 |                 |             |

## UV-vis and fluorescence spectra

According to a previously described method all compounds obtained were exposed to  $F^-$  anions (as the tetrabutylammonium salt) to evaluate the possibility of 100% conversion of dimeric forms to monomeric ones monitoring the equilibrium shift by UV-vis spectroscopy.<sup>12</sup> Then, for two compounds,  $tBu_8Dz_4PzMg$  in pyridine and  $tBu_8Ph_8Dz_4PzMg$  in DMSO, under conditions where they exist 100% in the monomeric forms without the addition of  $F^-$  anions, the effect of the TBAF addition on their fluorescence quantum yields was tested. It was shown that the coordination of  $F^-$  anions to the monomeric complexes slightly shifts the maxima in the absorption and fluorescence spectra but does not change the fluorescence quantum yield. Thus, we can conclude that it is possible to estimate the extent of dissociation using the ratio of fluorescence peak areas (G) of the complex before and after the addition of  $F^-$  anions. The ratio of fluorescence peak areas (Table S13) before and after the addition of  $F^-$  anions will correspond to the extent of dissociation ( $\alpha$ ) only if the dimeric form of the complex does not fluoresce. Thus, in pyridine, where the equilibrium is more shifted towards the dimeric forms of the complexes, we additionally recorded the fluorescence excitation spectra (Fig S15, dot blue line) for each case, in order to exclude the contribution of the probable dimeric form fluorescence to the observed fluorescence.

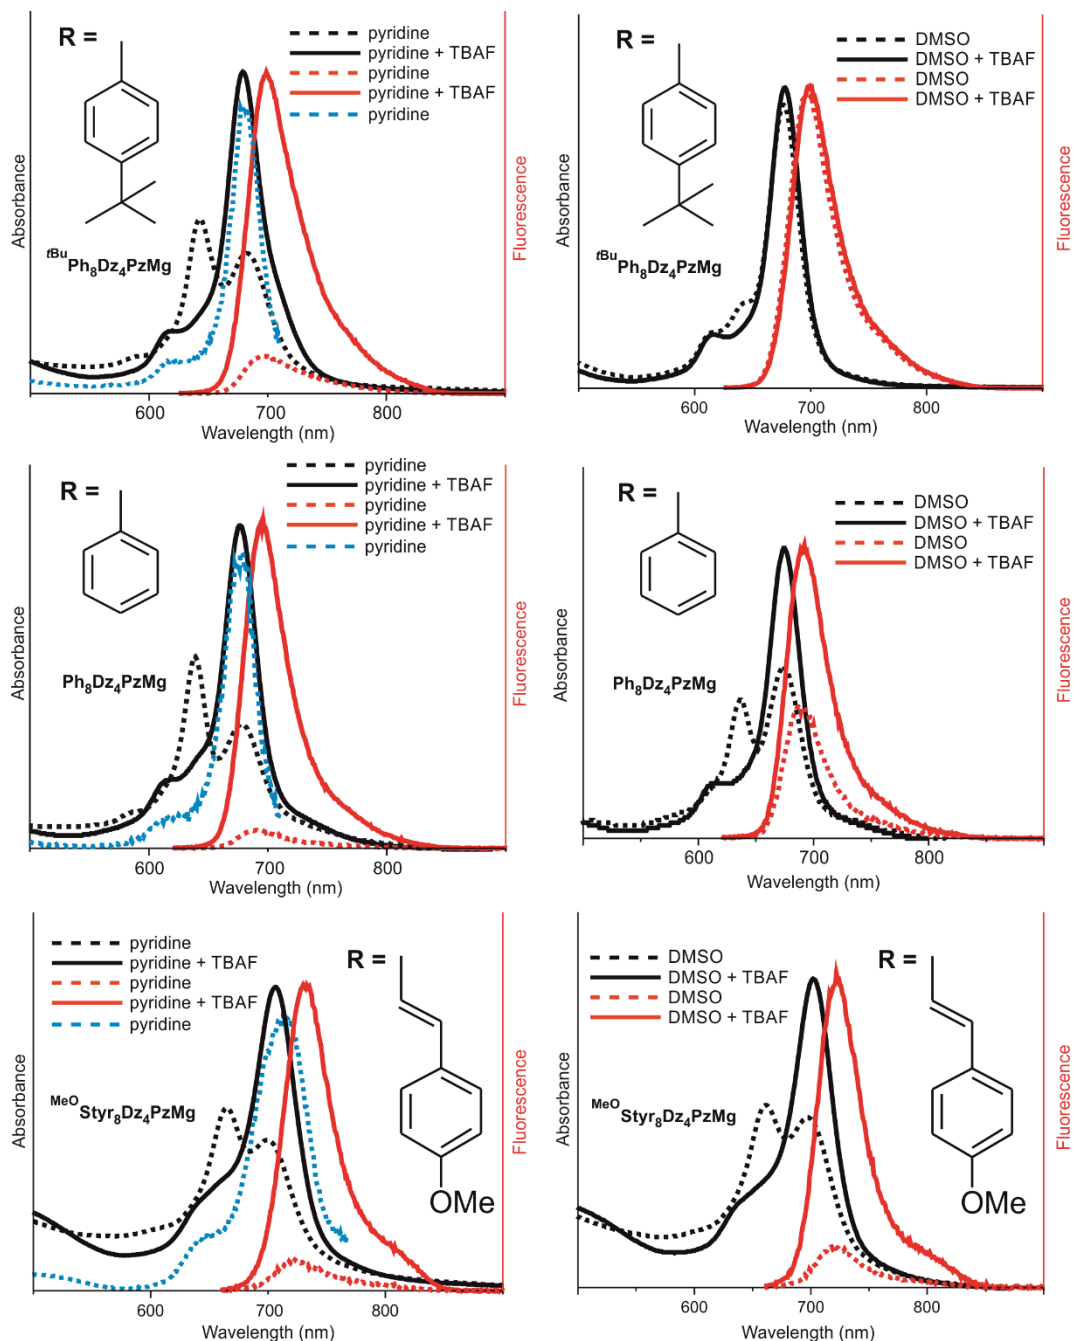

**Fig. S19** UV-vis (black line), fluorescence (red line) and excitation (blue line) spectra of complexes under different conditions.  $\lambda_{ex} = 615$  nm,  $\lambda_{em} = 730$  nm for  $tBu_8Ph_8Dz_4PzMg$  and  $Ph_8Dz_4PzMg$ ;  $\lambda_{ex} = 650$  nm,  $\lambda_{em} = 790$  nm for  $MeOStyr_8Dz_4PzMg$ .

**Table S21** Fluorescence data and determining the dissociation constant ( $K_d$ ) of dimer in solution

| Complex                                                      | Solvent  | Temp.,<br>K | G(fluorescence), a.u. |                                |                             | $K_d \cdot 10^7$ |
|--------------------------------------------------------------|----------|-------------|-----------------------|--------------------------------|-----------------------------|------------------|
|                                                              |          |             | without TBAF<br>(G)   | with TBAF<br>(G <sub>F</sub> ) | G/G <sub>F</sub> = $\alpha$ |                  |
| <i>t</i> BuPh <sub>8</sub> Dz <sub>4</sub> PzMg              | DMSO     | r.t.        | 22324                 | 22826                          | 0.98                        | 1441             |
|                                                              | pyridine |             | 2745                  | 21282                          | 0.13                        | 0.58             |
| Ph <sub>8</sub> Dz <sub>4</sub> PzMg                         | DMSO     | r.t.        | 9509                  | 21184                          | 0.45                        | 11.05            |
|                                                              | pyridine |             | 1318                  | 21448                          | 0.06                        | 0.11             |
| <i>Me</i> <sup>o</sup> Sty <sub>8</sub> Dz <sub>4</sub> PzMg | DMSO     | r.t.        | 826                   | 5836                           | 0.14                        | 0.68             |
|                                                              | pyridine |             | 1421                  | 13177                          | 0.11                        | 0.41             |

$$K_d = \frac{\alpha^2 \cdot c}{1 - \alpha}, C_M(\text{complex}) = 3 \mu\text{M}.$$

## Spectroelectrochemistry

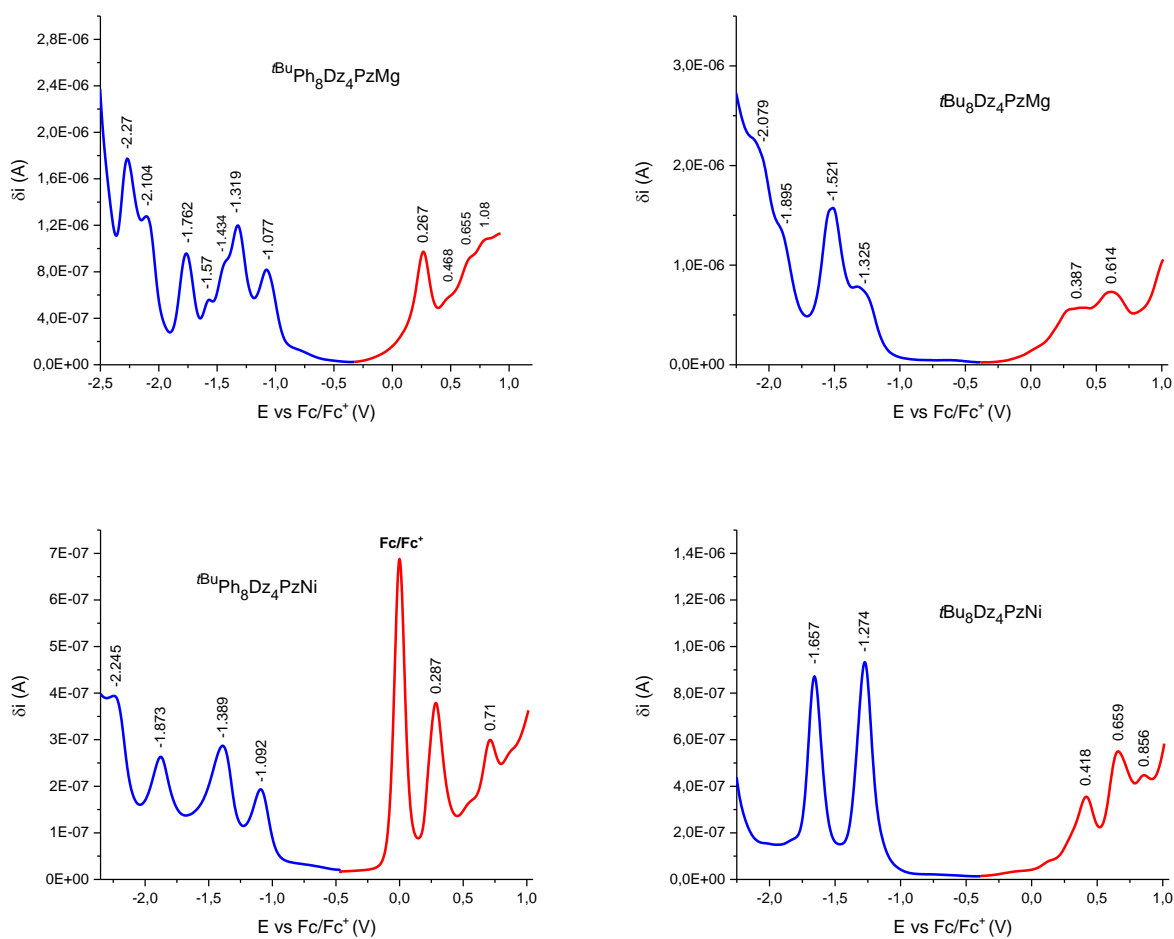**Fig. S20** CV of *t*BuPh<sub>8</sub>Dz<sub>4</sub>PzMg, *t*Bu<sub>8</sub>Dz<sub>4</sub>PzMg, *t*BuPh<sub>8</sub>Dz<sub>4</sub>PzNi and *t*Bu<sub>8</sub>Dz<sub>4</sub>PzNi (2.1 mg in 10 mL DCM) in 0.1 M TBAPF<sub>6</sub> DCM solution. Measured vs Ag/Ag<sup>+</sup> (0.01 M AN) RE, converted to Fc/Fc<sup>+</sup> scale. WE: Pt 1mm diam.

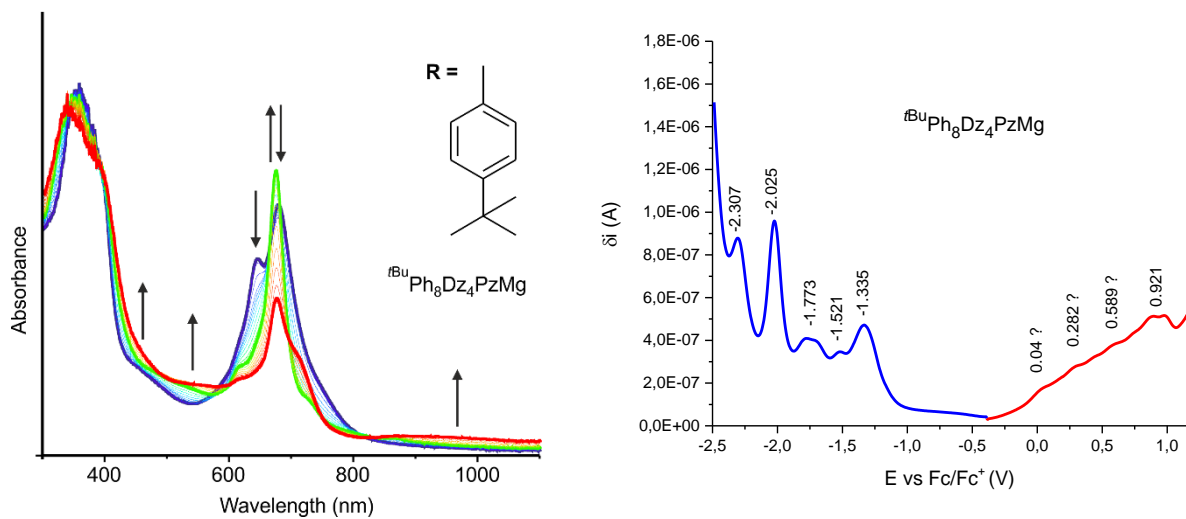

**Fig. S21** Left: UV-Vis spectral changes for  $t\text{BuPh}_8\text{Dz}_4\text{PzMg}$  (20  $\mu\text{M}$ ) in DCM containing 0.1 M  $[\text{BuN}_4][\text{PF}_6]$  during controlled potential oxidation (+0.7 V vs.  $\text{Ag}/\text{Ag}^+$ ) and reduction (-0.2 V vs.  $\text{Ag}/\text{Ag}^+$ ), respectively. Right: CV of  $t\text{BuPh}_8\text{Dz}_4\text{PzMg}$  (2.1 mg in 10 mL DCM) in 0.1 M  $\text{TBAPF}_6$  DCM solution. Measured vs  $\text{Ag}/\text{Ag}^+$  (0.01 M AN) RE, converted to  $\text{Fc}/\text{Fc}^+$  scale. WE: Pt 1mm diam.

## References

- 1 G. R. Fulmer, A. J. M. Miller, N. H. Sherden, H. E. Gottlieb, A. Nudelman, B. M. Stoltz, J. E. Bercaw and K. I. Goldberg, *Organometallics*, 2010, **29**, 2176–2179.
- 2 E. N. Tarakanova, S. A. Trashin, A. O. Simakov, T. Furuyama, A. V. Dzuban, L. N. Inasaridze, P. A. Tarakanov, P. A. Troshin, V. E. Pushkarev, N. Kobayashi and L. G. Tomilova, *Dalt. Trans.*, 2016, **45**, 12041–12052.
- 3 E. N. Tarakanova, P. A. Tarakanov, R. S. Kumeev, S. E. Nefedov and P. A. Stuzhin, *J. Porphyr. Phthalocyanines*, 2021, **25**, 1203–1211.
- 4 P. A. Tarakanov, M. P. Donzello, O. I. Koifman and P. A. Stuzhin, *Macroheterocycles*, 2011, **4**, 177–183.
- 5 E. N. Tarakanova, P. A. Tarakanov, V. E. Pushkarev and L. G. Tomilova, *J. Porphyr. Phthalocyanines*, 2014, **18**, 149–154.
- 6 E. N. Tarakanova, P. A. Tarakanov, A. O. Simakov, T. Furuyama, N. Kobayashi, D. V. Konev, O. A. Goncharova, S. A. Trashin, K. De Wael, I. V. Sulimenzov, V. V. Filatov, V. I. Kozlovskiy, L. G. Tomilova, P. A. Stuzhin and V. E. Pushkarev, *Dalt. Trans.*, 2021, **50**, 6245–6255.
- 7 M. Pia Donzello, C. Ercolani, P. A. Stuzhin, A. Chiesi-Villa and C. Rizzoli, *Eur. J. Inorg. Chem.*, 1999, **1999**, 2075–2084.
- 8 M. P. Donzello, C. Ercolani, L. Mannina, E. Viola, A. Bubnova, O. G. Khelevina and P. A. Stuzhin, *Aust. J. Chem.*, 2008, **61**, 262–272.
- 9 E. Wieczorek, D. T. Mlynarczyk, M. Kucinska, J. Długaszewska, J. Piskorz, L. Popena, W. Szczolko, S. Jurga, M. Murias, J. Mielcarek and T. Goslinski, *Eur. J. Med. Chem.*, 2018, **150**, 64–73.
- 10 E. Wieczorek, J. Piskorz, L. Popena, S. Jurga, J. Mielcarek and T. Goslinski, *Tetrahedron Lett.*, 2017, **58**, 758–761.
- 11 P. A. Tarakanov, A. O. Simakov, A. V. Dzuban, V. I. Shestov, E. N. Tarakanova, V. E. Pushkarev and L. G. Tomilova, *Org. Biomol. Chem.*, 2016, **14**, 1138–1146.
- 12 P. A. Tarakanov, E. N. Tarakanova, P. V. Dorovatovskii, Y. V. Zubavichus, V. N. Khrustalev, S. A. Trashin, K. De Wael, M. E. Neganova, D. V. Mischenko, J. L. Sessler, P. A. Stuzhin, V. E. Pushkarev and L. G. Tomilova, *Dalt. Trans.*, 2018, **47**, 14169–14173.
- 13 P. A. Stuzhin, P. Tarakanov, S. Shiryayeva, A. Zimenkova, O. I. Koifman, E. Viola, M. P. Donzello and C. Ercolani, *J. Porphyr. Phthalocyanines*, 2012, **16**, 968–976.
- 14 T. Goslinski, J. Piskorz, D. Brudnicki, A. J. P. White, M. Gdaniec, W. Szczolko and E. Tykarska, *Polyhedron*, 2011, **30**, 1004–1011.
- 15 J. Piskorz, E. Tykarska, M. Gdaniec, T. Goslinski and J. Mielcarek, *Inorg. Chem. Commun.*, 2012, **20**, 13–17.
